# Supplementary material for: Infection-related complications after common infection in association with new antibiotic prescribing in primary care: retrospective cohort study using linked electronic health records
Source: PubMed Central journal article supplement — BMJ Open. 2021 Jan 14;11(1):e041218. doi: 10.1136/bmjopen-2020-041218 (PMC7813359; doi:10.1136/bmjopen-2020-041218), 2021-01-14
Supplement: bmjopen-2020-041218.draft_revisions.pdf [file bmjopen-2020-041218.draft_revisions.pdf]

# BMJ Open

BMJ Open is committed to open peer review. As part of this commitment we make the peer review history of every article we publish publicly available.

When an article is published we post the peer reviewers' comments and the authors' responses online. We also post the versions of the paper that were used during peer review. These are the versions that the peer review comments apply to.

The versions of the paper that follow are the versions that were submitted during the peer review process. They are not the versions of record or the final published versions. They should not be cited or distributed as the published version of this manuscript.

BMJ Open is an open access journal and the full, final, typeset and author-corrected version of record of the manuscript is available on our site with no access controls, subscription charges or pay-per-view fees (<http://bmjopen.bmj.com>).

If you have any questions on BMJ Open's open peer review process please email [info.bmjopen@bmj.com](mailto:info.bmjopen@bmj.com)

# BMJ Open

## Infection-related complications after common infection in association with new antibiotic prescribing in primary care: retrospective cohort study using linked electronic health records

|                               |                                                                                                                                                                                                                                                                                                                                                                                                                                                                                                                                                              |
|-------------------------------|--------------------------------------------------------------------------------------------------------------------------------------------------------------------------------------------------------------------------------------------------------------------------------------------------------------------------------------------------------------------------------------------------------------------------------------------------------------------------------------------------------------------------------------------------------------|
| Journal:                      | <i>BMJ Open</i>                                                                                                                                                                                                                                                                                                                                                                                                                                                                                                                                              |
| Manuscript ID                 | bmjopen-2020-041218                                                                                                                                                                                                                                                                                                                                                                                                                                                                                                                                          |
| Article Type:                 | Original research                                                                                                                                                                                                                                                                                                                                                                                                                                                                                                                                            |
| Date Submitted by the Author: | 02-Jun-2020                                                                                                                                                                                                                                                                                                                                                                                                                                                                                                                                                  |
| Complete List of Authors:     | van Bodegraven, Birgitta; The University of Manchester, Health e-Research Centre<br>Palin, Victoria ; The University of Manchester, Health e-Research Centre<br>Mistry, Chirag; The University of Manchester, Health e-Research Centre<br>Sperrin, Matthew; The University of Manchester, Health e-Research Centre<br>White , Andrew; NHS Greater Manchester Shared Service<br>Welfare, William; Public Health England, North West<br>Ashcroft, Darren; University of Manchester<br>van Staa, Tjeerd; The University of Manchester, Health e-Research Centre |
| Keywords:                     | EPIDEMIOLOGY, INFECTIOUS DISEASES, Quality in health care < HEALTH SERVICES ADMINISTRATION & MANAGEMENT, Health policy < HEALTH SERVICES ADMINISTRATION & MANAGEMENT, Health informatics < BIOTECHNOLOGY & BIOINFORMATICS                                                                                                                                                                                                                                                                                                                                    |
|                               |                                                                                                                                                                                                                                                                                                                                                                                                                                                                                                                                                              |

SCHOLARONE™  
Manuscripts

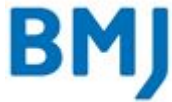

I, the Submitting Author has the right to grant and does grant on behalf of all authors of the Work (as defined in the below author licence), an exclusive licence and/or a non-exclusive licence for contributions from authors who are: i) UK Crown employees; ii) where BMJ has agreed a CC-BY licence shall apply, and/or iii) in accordance with the terms applicable for US Federal Government officers or employees acting as part of their official duties; on a worldwide, perpetual, irrevocable, royalty-free basis to BMJ Publishing Group Ltd ("BMJ") its licensees and where the relevant Journal is co-owned by BMJ to the co-owners of the Journal, to publish the Work in this journal and any other BMJ products and to exploit all rights, as set out in our [licence](#).

The Submitting Author accepts and understands that any supply made under these terms is made by BMJ to the Submitting Author unless you are acting as an employee on behalf of your employer or a postgraduate student of an affiliated institution which is paying any applicable article publishing charge ("APC") for Open Access articles. Where the Submitting Author wishes to make the Work available on an Open Access basis (and intends to pay the relevant APC), the terms of reuse of such Open Access shall be governed by a Creative Commons licence – details of these licences and which [Creative Commons](#) licence will apply to this Work are set out in our licence referred to above.

Other than as permitted in any relevant BMJ Author's Self Archiving Policies, I confirm this Work has not been accepted for publication elsewhere, is not being considered for publication elsewhere and does not duplicate material already published. I confirm all authors consent to publication of this Work and authorise the granting of this licence.

1  
2  
3  
4 **Infection-related complications after common infection in**  
5  
6 **association with new antibiotic prescribing in primary care:**  
7  
8 **retrospective cohort study using linked electronic health records**  
9  
10

11  
12 Birgitta van Bodegraven<sup>1</sup> (0000-0002-8359-9017), Victoria Palin<sup>1</sup> (0000-0002-0851-8619),  
13  
14 Chirag Mistry<sup>1</sup>, Matthew Sperrin<sup>1</sup> (0000-0002-5351-9960), Andrew White<sup>2</sup>, William Welfare  
15  
16 (0000-0002-8304-1048)<sup>3</sup>, Darren M Ashcroft (0000-0002-2958-915X)<sup>4</sup>, Tjeerd Pieter van  
17  
18 Staa (0000-0001-9363-742X)<sup>1,5</sup>  
19

20  
21 <sup>1</sup> Health e-Research Centre, Health e-Research Centre, School of Health Sciences, Faculty of  
22  
23 Biology, Medicine and Health, The University of Manchester, Oxford Road, Manchester, M13 9PL, UK  
24

25 <sup>2</sup> NHS Greater Manchester Shared Service, Ellen House, Waddington Street, Oldham, OL9 6EE, UK  
26

27 <sup>3</sup> Public Health England North West, 3 Piccadilly Place, London Road, Manchester, M1 3BN, UK  
28

29  
30 <sup>4</sup> Centre for Pharmacoepidemiology and Drug Safety, NIHR Greater Manchester Patient Safety  
31  
32 Translational Research Centre, School of Health Sciences, Faculty of Biology, Medicine and Health,  
33  
34 Manchester Academic Health Science Centre (MAHSC), The University of Manchester, Oxford Road,  
35  
36 Manchester, M13 9PL, UK  
37

38 <sup>5</sup> Utrecht Institute for Pharmaceutical Sciences, Utrecht University, Utrecht, the Netherlands  
39

40  
41 **Correspondence to:** Birgitta van Bodegraven, birgitta.vanbodegraven@manchester.ac.uk,  
42  
43 alternative: Tjeerd van Staa, tjeerd.vanstaa@manchester.ac.uk  
44

45  
46 **Keywords:** Antibiotic prescription, hospitalisation, infection-related complications, common  
47  
48 infection, primary care  
49

50  
51 **Word count:** 3525  
52  
53  
54  
55  
56  
57  
58  
59  
60

## ABSTRACT

**Objective** Determine the association of incident antibiotic prescribing levels for common infections with infection-related complications and hospitalisations by comparing high with low prescribing GP practices.

**Design** Retrospective cohort study.

**Data source** UK primary care records from the Clinical Practice Research Datalink (CPRD GOLD) and SAIL Databank (SAIL) linked with Hospital Episode Statistics (HES) data, including 546 CPRD, 346 CPRD-HES and 338 SAIL-HES practices.

**Exposures** Initial general practice visit for one of six common infections and the rate of antibiotic prescribing in each practice.

**Main outcome measures** Incidence of infection-related complications (as recorded in general practice) or infection-related hospital admission within 30 days after consultation for a common infection.

**Results** A practice with 10.4% higher antibiotic prescribing (the interquartile range (IQR)) was associated with a 5.7% lower rate of infection-related hospital admissions (95% Confidence Interval 3.3% to 8.0%). The association varied by infection with larger difference in hospital admission rate with lower respiratory tract infection (16.1%; 12.4% to 19.7%) and urinary tract infection (14.7%; 7.6% to 21.1%) and smaller difference in hospital admission rate for upper respiratory tract infection (6.5%; 3.5% to 9.5%) The association of antibiotic prescribing levels and hospital admission was largest in younger patients (8.6%; 4.0% to 13.0%) and smallest in the elderly (0.3%; -3.4% to 3.9%).

**Conclusions** There is an association between lower levels of practice level antibiotic prescribing and higher infection-related hospital admissions. Indiscriminately reducing antibiotic prescribing may lead to harm. Greater focus is needed to optimise antibiotic use by reducing inappropriate antibiotic prescribing and better targeting antibiotics to patients at high risk of infection-related complications.

## ARTICLE SUMMARY

### Strengths and limitations of this study

- Two large primary care databases with linked hospitalisation data were used to evaluate the difference in hospital admission after community acquired common infections comparing high with low prescribing GP practices.
- This analysis focusses on antibiotic prescribing at practice level with the emphasis on evaluating governmental guidance on reducing overall prescribing.
- Incidental antibiotic prescriptions were evaluated in this analysis and the results can only be interpreted in this context.
- No data was extracted on infection severity or symptom scores therefore no conclusions can be drawn on the appropriateness of antibiotics prescribed.

### INTRODUCTION

Common infections, such as sore throat or sinusitis, are often self-limiting and usually get better without antibiotics; nevertheless, they are frequently prescribed [1,2]. Research regarding antimicrobial resistance (AMR) and antibiotic prescribing rates often focuses on reducing inappropriate prescribing to lower the threat of increasing antimicrobial resistance [3]. Antibiotic prescribing for common self-limiting infections is often seen as a target for reduction [3,4]. However, a proportion of common infections are caused by bacterial infections that may progress and antibiotics may reduce infection-related adverse outcomes.

The UK AMR national action plan for 2019-2024 continues on from the last AMR strategy (2013-2018) with updated aims and targets to address the continued problem of resistance. One aim is to optimise antibiotic use through stewardship programmes, including a 25% reduction in antibiotic use in the community from the 2013 baseline [5]. Antibiotic prescribing in primary care in England shows a declining trend (-13.2%) between 2013 and 2017, however, to reach desired reduction targets continued efforts are needed [3].

1  
2  
3 A small number of studies have analysed the relationship between antibiotic prescribing  
4 rates and adverse events in primary care. Petersen *et al.* [6] (2007) and Gulliford *et al.* [7]  
5 (2016) studied the relationship between antibiotic prescribing rates in primary care and  
6 complication in patients with common respiratory tract infections (RTIs). Both studies  
7 reported reductions in incidence of pneumonia, as recorded by the general practitioner (GP),  
8 with higher levels of antibiotic prescribing. However, these studies did not evaluate the  
9 association of prescribing rates with the rate of hospital admission after common infections  
10 in primary care.  
11

12  
13  
14  
15  
16  
17  
18  
19  
20  
21 Gharbi *et al.* (2019) reported that prescribing immediate antibiotics in primary care to elderly  
22 patients for urinary tract infection (UTI) was associated with a lower risk of bloodstream  
23 infection, hospital admission, and all-cause mortality compared with no antibiotics and  
24 deferred antibiotic prescribing [8]. However, antibiotic prescribing in primary care is known to  
25 increase the risk of resistant infections [9]. This highlights the challenge in balancing  
26 prescribing to reduce the risk of severe outcomes and limiting overall antibiotic consumption  
27 to slow the development of AMR.  
28  
29  
30  
31  
32  
33  
34  
35

36 The association between practice antibiotic prescribing rates and the rate of hospital  
37 admission after common infection when clearly separated from other infection-related  
38 complications managed in the community has not previously been studied. There is  
39 uncertainty with regards to the relationship between antibiotic prescribing levels and  
40 complications that can arise after various common infections. The objective of this study was  
41 to investigate the association between practice level antibiotic prescribing in primary care for  
42 multiple common infections and the rate of infection-related complications through  
43 comparison of high and low prescribing GP practices. These data provide insight into the  
44 role of antibiotic prescribing patterns in controlling the rate of adverse events.  
45  
46  
47  
48  
49  
50  
51  
52  
53  
54

## 55 **METHOD:**

### 56 **Data sources**

1  
2  
3 The Clinical Practice Research Datalink (CPRD GOLD [10]) and the Secure Anonymised  
4 Information Linkage Databank (SAIL [11]) were used in this study. CPRD is a UK primary  
5 care database with routinely collected electronic health records [10]. All patients registered  
6 with a participating general practice are anonymously included in the dataset. Data has been  
7 collected from 1987 and represents about 8% of the UK population. CPRD is broadly  
8 representative of the general UK population in terms of age, sex, and ethnicity [10]. The  
9 SAIL databank is a data repository of anonymised personal data collected for research from  
10 75% of Welsh general practices [11]. Within SAIL, individual GP practices share anonymised  
11 patient-level clinical information on symptoms, diagnoses and prescribed treatment. As  
12 Welsh GP practices are included in both CPRD and SAIL they have been removed from  
13 CPRD to avoid replication.

14  
15 For both data sources, all patient level data was aggregated up to practice level. The final  
16 CPRD dataset contained 546 GP practices of which 346 (located in England only), were  
17 linked with hospital admitted patient care data (Hospital Episode Statistics (HES)). The SAIL  
18 Databank included 338 GP practices, all linked to HES.

### 19 **Selection and eligibility criteria:**

20  
21 The CPRD study population included patients with a consultation between 1st January 2000  
22 and 30th June 2015; for SAIL, the time period was between 1st January 2000 and 31st  
23 December 2017. The study population included patients with an initial GP consultation and  
24 clinical READ code for a common infection. This was defined as the first incident  
25 consultation for a common infection within six months and without an antibiotic prescription  
26 in the previous one month. Six common infections were included: upper respiratory tract  
27 infection (URTI, cough or cold, sore throat), lower respiratory tract infection (LRTI), otitis  
28 externa, otitis media, sinusitis, and urinary tract infection (UTI).

29  
30 Patients were eligible to be included if they were permanently registered at the GP practice,  
31 had a minimum of one year follow-up since data collection (except for children under one),  
32 and at least one record of an incident common infection. Male and females of any age were



1  
2  
3 eligible. Patients were not required to have an antibiotic prescribed at the time of visit for  
4  
5 common infection. Patients with an infection-related complication or an infection-related  
6  
7 hospital admission in the six months prior or on the day of consultation were excluded. The  
8  
9 number of patients who received an antibiotic at the consultation was determined. The  
10  
11 practice antibiotic prescribing rate was the percentage of consultations that resulted in an  
12  
13 antibiotic prescription in the complete study period.  
14  
15

### 16 **Exposure and outcomes:**

17  
18 Infection-related hospital admission was identified using the primary admission diagnosis  
19  
20 using ICD-10 codes from the linked HES data. This outcome was evaluated using the  
21  
22 CPRD-HES and SAIL-HES datasets. The second outcome evaluated was infection-related  
23  
24 complications as recorded in the primary care records. Both outcomes were evaluated  
25  
26 during the 30 days after the initial common infection consultation. This outcome was  
27  
28 evaluated using the CPRD and SAIL datasets.  
29  
30

31  
32 Person time at risk was calculated for the registered CPRD and SAIL population by counting  
33  
34 the days without diagnosis of infection-related complications during the 30 day follow-up  
35  
36 after the date of common infection. The rates of infection-related outcomes were calculated  
37  
38 by dividing the number of events by the person time at risk (per 1000 person-month). The  
39  
40 outcomes were identified based on pre-defined code lists. Compiled code lists are available  
41  
42 on [clinicalcodes.org](http://clinicalcodes.org) [12]. The ICD-10 codes used were reviewed by clinical experts.  
43  
44 Infection-related hospital admission includes codes for admission for sepsis, endocarditis,  
45  
46 acute respiratory tract infection, or bacterial meningitis. Infection-related complications as  
47  
48 recorded in the primary care records includes any revisit to the GP for infection-related  
49  
50 complications such as pneumonia, sepsis, quinsy, mastoiditis, or meningitis in the 30 day  
51  
52 follow-up period.  
53

54  
55 subsequent analyses.  
56

### 57 **Statistical analysis**

1  
2  
3 Infection-related complications were modelled with negative binomial regression using  
4 practice level antibiotic prescribing as a predictor and the log of person time at risk as an  
5 offset. The unit of analysis is the practice. The analysis was adjusted with the scaled mean  
6  
7 at practice level of age, vaccination against influenza, and hospital admission in the previous  
8  
9 year. Additionally, the analysis was adjusted with the scaled proportion of each category at  
10  
11 practice level of the following categorical characteristic: Sex, Charlson Comorbidity Index  
12  
13 [13], body mass index (BMI), smoking status (never, currently, past, unknown), and  
14  
15 socioeconomic status (SES, least deprived to most deprived). Linked Index of Multiple  
16  
17 Deprivation (IMD) data in quintiles based on patient's residential postcode were available for  
18  
19 both datasets. Census based IMD data measures deprivation at area-level based on  
20  
21 domains, such as income, employment, health, housing, and general environment [14]. The  
22  
23 proportion of socioeconomic status (SES) was derived from patients with linkage to IMD  
24  
25 quintiles. Additionally, analyses using CPRD and CPRD-HES were adjusted with the mean  
26  
27 at practice level of the number of GPs per 1000 consults and the patient transfer-out rate. No  
28  
29 imputations or other adjustments were performed for missing characteristics in the  
30  
31 covariates.  
32  
33  
34  
35  
36

37 All variables were scaled with their associated interquartile range (IQR: 75th to 25th  
38  
39 percentile) by dividing the original values by the IQR from the variable [15]. This creates a  
40  
41 natural comparison between high and low prescribing GP practices. The antibiotic  
42  
43 prescribing rate was modelled continuously. Because of the scaling the IQR becomes the  
44  
45 unit that the effect size is expressed in. Both outcomes were compared against all common  
46  
47 infections in the initial analysis. The association of each of the six common infections was  
48  
49 then studied against both outcomes separately. The analyses were further stratified by  
50  
51 gender and age categories: 0-17, 18-39, 40-59, 60-74, 75+ years old to evaluate the varied  
52  
53 prescribing among these risk groups. The beta coefficient of the antibiotic prescribing rate  
54  
55 was exponentiated and is presented as an incidence rate ratio (IRR). The effect estimates  
56  
57  
58  
59  
60

1  
2  
3 from the CPRD and SAIL cohorts were combined using a meta-analysis method with inverse  
4 variance weighting and DerSimonian and Laird random effect models.  
5  
6

7  
8 Absolute difference in antibiotic prescribing between high and low prescribing practices was  
9 calculated from the prescribing rates (25th and 75th percentiles) and mean events per  
10 practice. The absolute difference in infection-related complications between high and low  
11 prescribing was calculated using the complication rate and the IRR. The number needed to  
12 treat (NNT) with antibiotics to prevent one event of hospital admission was calculated by  
13 dividing the absolute difference in antibiotic prescribing by the absolute difference in  
14 complications. Forestplot [16], dplyr [17], and MASS [18] packages in R were used for the  
15 analysis. All analyses were performed using R-software version 3.4.1 (R Foundation for  
16 Statistical Computing; Vienna, Austria).  
17  
18  
19  
20  
21  
22  
23  
24  
25

## 26 27 **RESULTS**

28  
29 The study was based on a total of 19.6 million GP consultations for common infections.  
30 URTI was the most frequent common infection (CPRD: 9,646,774) followed by LRTI (CPRD:  
31 2,288,616) and UTI (CPRD: 1,511,176). A total of 884 GP practices were included in the  
32 analysis (CPRD: 546; SAIL: 338) (Table 1). The mean age of the practice population was 38  
33 years in CPRD and 30 years in SAIL. The majority of patients had no comorbidities recorded  
34 (Charlson score: 0). There were 25,721 cases of infection-related complications as recorded  
35 in primary care in CPRD and 15,192 cases in SAIL. The rate of these complications was 1.3  
36 and 4.1 per 1000 person-months respectively. For infection-related hospital admission, the  
37 number of cases was 17,810 in CPRD-HES and 19,796 in SAIL-HES, with rates of 1.4 and  
38 5.1 per 1000 person-months, respectively (Table 2). The majority of antibiotics were  
39 prescribed for LRTI, Sinusitis, and UTI (Table 3). Antibiotics were less likely to be prescribed  
40 for Otitis Externa. There was considerable variability between general practices in the  
41 percentages of patients prescribed an antibiotic. For URTI, 28.6% of the patients received an  
42 antibiotic at the 5th percentile practice and 66.4% at the 95th percentile practice. Summary  
43  
44  
45  
46  
47  
48  
49  
50  
51  
52  
53  
54  
55  
56  
57  
58  
59  
60

counts of infection-related hospital admission types from CPRD-HES are available in appendix 1, supplementary material.

### **Infection-related hospital admission**

The incidence of infection-related hospital admission was found to be associated with the practice-level antibiotic prescribing rate (Figure 1). A 10.4% higher antibiotic prescribing rate (IQR) was associated with an IRR of 0.943 (0.920 to 0.967), denoting a 5.7% lower infection-related hospital admission rate in the combined analysis. Results between CPRD-HES and SAIL-HES were comparable. In CPRD-HES, a 10.1% higher antibiotic prescribing rate was associated with an IRR of 0.959 (0.926 to 0.992), meaning a 4.1% lower hospital admission rate. For SAIL-HES, this was 7.2% (IRR: 0.928; 0.895 to 0.961) lower with the IQR of 10.7% higher antibiotic prescribing by GP practices.

The observed association varied by infection. The largest difference in the incidence of hospital admission for the combined analysis was observed in LRTI (IRR: 0.839; 16.1%), UTI (IRR: 0.853; 14.7%), and URTI (IRR: 0.935; 6.5%) (Figure 2). In patients with URTI, 14.9% (CPRD-HES) and 17.2% (SAIL-HES) higher antibiotic prescribing was associated with infection-related hospital admissions being lower by 7.7% (0.923; 0.879 to 0.969) and 5.6% (0.944; 0.905 to 0.984). LRTI was associated with a 14.2% (CPRD-HES, IRR: 0.858) and 18.2% (SAIL-HES, IRR: 0.818) lower incidence for hospital admission when antibiotic prescribing was higher by 8.7% and 15.1%. In patients who consulted their GP for UTI, the incidence of hospital admission was 10.5% (IRR: 0.895) lower with 7.6% higher antibiotic prescribing (CPRD-HES). In SAIL-HES, 12.0% higher antibiotic prescribing for UTI was associated with lower incidence by 16.8% (IRR: 0.832). Patients aged 18-39 years old had the greatest difference in incidence for hospital admission (CPRD-HES: 0.884 (IQR unit: 10.88)) amongst the age categories (figure 3).

The number needed to treat with antibiotics to prevent one patient from developing infection-related complications was calculated over the 30 day follow-up period. The number needed

1  
2  
3 to treat for patients with URTI at risk of hospital admission was 1164. For patients with LRTI  
4 and UTI the number needed to treat was 417 and 484 respectively.  
5  
6

### 7 **GP-recorded infection-related complications**

8  
9  
10 Higher levels of antibiotic prescribing by GP practices were associated with lower incidence  
11 of infection-related complication as recorded by the GP. The incidence of GP-recorded  
12 infection-related complications reduced by 16.9% (0.831; 0.791 to 0.873) and 9.0% (0.910;  
13 0.866 to 0.954) with an increase in antibiotic prescribing of 10.4% and 10.6% for CPRD and  
14 SAIL respectively.  
15  
16  
17  
18  
19  
20

21 Evaluating the observed association by common infection separately found that URTI was  
22 associated with lower GP-recorded infection-related complications by 20.4% (0.803; 0.758 to  
23 0.852) when antibiotic prescribing increased by 15.5% in CPRD. In SAIL, the observed  
24 reduction was 12.7% (0.873; 0.832 to 0.916) when antibiotic prescribing increased by  
25 17.2%.  
26  
27  
28  
29  
30  
31

32 Antibiotic prescribing for LRTI being higher by 9.1% and 15.1% was associated with the  
33 incidence of GP-recorded infection-related complications being lower by 16.2% (IRR: 0.838)  
34 and 5.5% (IRR: 0.945) for CPRD and SAIL respectively. For UTI, the incidence of GP-  
35 recorded infection-related complications was similarly lowered across CPRD (12.7% (IQR  
36 unit: 8.01)) and SAIL (8.7% (IQR unit: 11.95)).  
37  
38  
39  
40  
41  
42

43 No effect modification by gender was observed in any of the datasets evaluated (Figure 3).  
44 The effect was more obvious in younger patients. Patients aged 0-17 had the greatest  
45 difference in GP-recorded infection-related complications in CPRD (22%; IRR: 0.780, IQR:  
46 12.05). Patients aged 0-17 years and 40-59 showed similar differences for both datasets  
47 (Figure 3). Polynomials were fitted on a deciled antibiotic prescribing rate as a sensitivity  
48 analysis. First order polynomials best fitted the data and showed a downward linear trend  
49 from low to high prescribing (Supplementary material, appendix 2).  
50  
51  
52  
53  
54  
55  
56  
57  
58  
59  
60

## DISCUSSION

This study found that higher levels of incident antibiotic prescribing by practices were associated with lower rates of hospital admission and GP diagnosed infection-related complications. Lower rate of poor clinical outcomes with higher levels of antibiotic prescribing was more pronounced for URTI, LRTI, and UTI but had no association with poor outcomes for otitis media and otitis externa. A higher level of incident antibiotic prescribing in younger patients was associated with better clinical outcomes while no association was observed in patients over 40 years old.

This is the first study to use two large primary care databases with linked hospitalisation data to evaluate the difference in hospital admission after common infections comparing high with low prescribing GP practices. The focus of this analysis was at practice level with the emphasis on evaluating governmental guidance on reducing overall prescribing. The study population was restricted to new antibiotic prescribing in patients with newly developed common infections. Including patients with more complex clinical scenarios, like repeated antibiotic users, complicates the estimation of the effect of interest. Past consultations and potential treatment for a common infection may be associated with future consultations, treatment, and future outcomes of interest. This will lead to a problem when the outcome of interest cannot be related back to a single index visit and instead potentially to more than one visit. The results of this analysis can only be interpreted in the context of the incidental antibiotic user.

This practice level analysis possibly simplifies the relationship between antibiotic prescribing rate and infection-related complications by aggregating data up to practice level and ignoring diversity in patient characteristics within a practice. Some potential confounding at practice level may occur due to variation in patient population frailty even when characteristics have been accounted for at practice level [19]. Diagnoses are based on clinical coding both in primary and secondary care and potential misclassifications or misdiagnoses in the underlying data could have occurred. Differences in coding practices for common infections

1  
2  
3 among English GP practices has been evaluated previously and found to be problematic at  
4 times [4]. As no data were available on infection severity or symptom scores, no conclusions  
5 can be drawn on the appropriateness of antibiotics prescribed. This analysis was based on  
6 digital patient charts without access to free-text due to GDPR rules as this poses a possible  
7 patient identification risk. Digital patient charts are automatically generated and transferred  
8 to the database.  
9

10  
11  
12  
13  
14  
15  
16 The incidence rates of the clinical outcomes were different between SAIL and CPRD, with  
17 higher rates in Wales. There has been a measles epidemic in Wales recently which may  
18 partly explain these differences. However, this remains speculative. Infections are often  
19 localised and infection rates differ between locations. In addition, the level of data available  
20 does not allow in-depth investigation into this difference. The NNTs presented are related to  
21 the 30 day follow-up window. They may appear large and initial clinical relevance uncertain.  
22 UK guidance for initiating statin use states those with a 10-year risk of 10-19% are eligible.  
23 Converting this 10-year risk to a 30 day estimated NNT gives a NNT of 1139 (10%) and 569  
24 (19%). These NNTs are similar to those presented in this analysis and have led to a change  
25 in clinical practice and prescribing behaviour.  
26  
27  
28  
29  
30  
31  
32  
33  
34  
35  
36

37  
38 Those with weaker immune systems, the very young and very old, have an elevated  
39 susceptibility to infections which may increase their antibiotic use and risk of related  
40 complications [20]. Analysis performed by age group showed that higher levels of antibiotic  
41 prescribing were associated with reduced infection-related complications in younger  
42 patients. Higher levels of antibiotic prescribing were not associated with lower rates of  
43 infection-related complications in patients aged 60+ years. A possible hypothesis for this is  
44 that increased lifetime exposure and repeatedly using antibiotics could lower their  
45 effectiveness in reducing a patient's risk of complications. This observation should be  
46 considered and explored in further research. GPs may be more hesitant to withhold  
47 antibiotics from older patients to avoid under-treatment, leading to seeing a greater response  
48 in younger patients at higher prescribing rates.  
49  
50  
51  
52  
53  
54  
55  
56  
57  
58  
59  
60



1  
2  
3 Costelloe *et al.* (2010) found that patients who were prescribed an antibiotic for respiratory or  
4 urinary tract infections develop antibiotic resistance that was detectable for up to 12 months  
5 [9]. The more antibiotics prescribed, the higher the GP re-attendance rates for common  
6 infections and subsequently the larger the re-prescribing antibiotic rate becomes [21]. A  
7 randomised trial involving 34 general practices following the STAR educational programme  
8 saw reductions in overall levels of antibiotic prescribing in the intervention group [22].  
9 Hospital admission for respiratory tract infections and complications increased by 1.9% in  
10 the intervention group, suggesting that reduced antibiotic prescribing may increase hospital  
11 admission. However, this result was not found to be statistically different and had limited  
12 statistical power.  
13  
14  
15  
16  
17  
18  
19  
20  
21  
22  
23  
24

25 UK initiatives have included the TARGET toolkit and the Quality Premium (QP) to reduce  
26 overall levels of antibiotic use [22–24]. The QP was introduced in April 2015 and provided a  
27 financial incentive to Clinical Commissioning Groups (CCGs) to reduce antibiotic prescribing  
28 rates. A significant 3% reduction in antibiotic prescribing rate was observed after this  
29 initiative was introduced, with greatest reduction in children [25]. Reducing antibiotic  
30 prescribing rates may be good for antibiotic resistance, but as shown here could potentially  
31 cause more infection-related complications. Antibiotic prescribing requires a careful balance;  
32 with each prescription to treat and reduce the risk of infection-related complications, the  
33 chance of developing resistant infections increases for individual patients and drives AMR  
34 risk for the wider community. With the current aim to reduce antibiotic prescribing in the  
35 community in the UK by 25% from the 2013 baseline, particular focus is required to  
36 understand individual patient risk, reducing inappropriate prescribing and monitor infection  
37 related complications. For patients with LRTI in primary care, Moore *et al.* [26] modelled a  
38 predictive value of the risk of patients developing serious outcomes including hospital  
39 admission. Such a direct approach, together with delayed prescribing strategies [27] are  
40 suggested to target prescribing to those most likely to develop complications and reduce  
41 overall prescribing.  
42  
43  
44  
45  
46  
47  
48  
49  
50  
51  
52  
53  
54  
55  
56  
57  
58  
59  
60



1  
2  
3 A Cochrane review of 27 trials on antibiotics for sore throat found that antibiotics prevented  
4 complications (acute rheumatic fever, glomerulonephritis, otitis media, and sinusitis) in  
5 patients, but the rate of complications were so low the benefit of antibiotic prescribing may  
6 not always be clear [28]. Similarly another Cochrane review focused on antibiotics for acute  
7 otitis media in children found that serious complications, such as mastoiditis and meningitis,  
8 were rare [29]. Both reviews highlighted the inability to predict which patients are at risk of  
9 developing complications. Clinical tools such as the FeverPAIN score and Centor criteria are  
10 used to guide antibiotic treatment for acute sore throat. However, Little *et al.* (2013)  
11 concluded that clinical scores such as FeverPAIN were of limited value in predicting clinical  
12 complications [30].  
13  
14  
15  
16  
17  
18  
19  
20  
21  
22  
23  
24

25 In conclusion, lower levels of practice level antibiotic prescribing were associated with higher  
26 levels of infection-related complications and hospital admissions. Identifying and developing  
27 accurate clinical tools for predicting which patients are at risk of complications requires much  
28 needed further research. To improve patient outcomes and reduce the risk of avoidable  
29 complications, there is a need to target patients most likely to benefit from effective, safe  
30 prescribing, based on shared decision making.  
31  
32  
33  
34  
35  
36  
37  
38  
39  
40  
41  
42  
43  
44  
45  
46  
47  
48  
49  
50  
51  
52  
53  
54  
55  
56  
57  
58  
59  
60

## NOTES

**Funding:** This work was supported by Connected Health Cities which is a Northern Health Science Alliance led programme funded by the Department of Health and Social Care and delivered by a consortium of academic and National Health Service organisations across the north of England. This study is partly based on data from the Clinical Practice Research Datalink obtained under licence from the UK Medicines and Healthcare products Regulatory Agency (MHRA). HES data is subject to Crown copyright (2018) protection, re-used with the permission of The Health, & Social Care Information Centre, all rights reserved. The data is provided by patients and collected by the NHS as part of their care and support. This study also used anonymised data held in the Secure Anonymised Information Linkage (SAIL) System, which is part of the national e-health records infrastructure for Wales. The interpretation and conclusions contained in this study are those of the authors alone, and not necessarily those of the SAIL, MHRA, NHTA, NHS or the Department of Health.

**Conflict of interest:** All authors have completed the ICMJE uniform disclosure form and declare: BvB, VP, CM, DA, TvS report grants from the Department of Health and Social Care for the submitted work; no financial relationships with any organisations that might have an interest in the submitted work in the previous three years; no other relationships or activities that could appear to have influenced the submitted work.

**Ethical approval:** The study protocol was approved by the Independent Scientific Advisory Committee for CPRD research [protocol number 16\_153] and SAIL's Information Governance Protocol Review Panel [protocol number 0693]. We would like to acknowledge all the data providers who make anonymised data available for research.

**Data sharing:** Read codes used are published on Clinicalcodes.org. Electronic health records are, by definition, considered sensitive data in the UK by the Data Protection Act and cannot be shared via public deposition because of information governance restriction in place to protect patient confidentiality. Access to data is available only once approval has been obtained through the individual constituent entities controlling access to the data.

1  
2  
3 CPRD data can be requested via application to the Clinical Practice Research Datalink  
4 (www.cprd.com), and SAIL data are available by application to the Secure Anonymised  
5 Information Linkage Databank (<https://saildatabank.com/>).  
6  
7  
8  
9

10 **Author contributor statement:** BvB and TvS contributed to the idea and design of the  
11 study. TvS extracted the relevant data from the database. BvB analysed the data and  
12 drafted the paper. All authors contributed to drafts and critical revision and approved the final  
13 manuscript.  
14  
15  
16  
17  
18  
19  
20  
21  
22  
23  
24  
25  
26  
27  
28  
29  
30  
31  
32  
33  
34  
35  
36  
37  
38  
39  
40  
41  
42  
43  
44  
45  
46  
47  
48  
49  
50  
51  
52  
53  
54  
55  
56  
57  
58  
59  
60

For peer review only

## REFERENCES

1. National Institute for Health and Care Excellence (NICE), NHS, Centre for Clinical Practice at NICE. Respiratory tract infections (self-limiting): prescribing antibiotics. 2008. Available at: <https://www.nice.org.uk/guidance/cg69/chapter/1-guidance>.
2. Pouwels KB, Dolk FCK, Smith DRM, Robotham J V., Smieszek T. Actual versus 'ideal' antibiotic prescribing for common conditions in English primary care. *Journal of Antimicrobial Chemotherapy* **2018**; 73:ii19–ii26.
3. Public Health England. English surveillance programme for antimicrobial utilisation and resistance (ESPAUR) Report 2018. 2018. Available at: <https://www.gov.uk/government/publications/english-surveillance-programme-antimicrobial-utilisation-and-resistance-espaur-report>.
4. Smieszek T, Pouwels KB, Dolk FCK, et al. Potential for reducing inappropriate antibiotic prescribing in English primary care. *Journal of Antimicrobial Chemotherapy* **2018**; 73:ii36–ii43.
5. Department of Health and Social Care. UK 5-year action plan for antimicrobial resistance 2019 to 2024. 2019. Available at: [https://assets.publishing.service.gov.uk/government/uploads/system/uploads/attachment\\_data/file/784894/UK\\_AMR\\_5\\_year\\_national\\_action\\_plan.pdf](https://assets.publishing.service.gov.uk/government/uploads/system/uploads/attachment_data/file/784894/UK_AMR_5_year_national_action_plan.pdf).
6. Petersen I, Johnson AM, Islam A, Duckworth G, Livermore DM, Hayward AC. Protective effect of antibiotics against serious complications of common respiratory tract infections: retrospective cohort study with the UK General Practice Research Database. *BMJ (Clinical research ed)* **2007**; 335:982.
7. Gulliford MC, Gulliford MC, Moore M V, et al. Safety of reduced antibiotic prescribing for self limiting respiratory tract infections in primary care: cohort study using electronic health records. *The BMJ* **2016**; 354:354:1–10.
8. Gharbi M, Drysdale JH, Lishman H, et al. Antibiotic management of urinary tract infection in elderly patients in primary care and its association with bloodstream infections and all cause mortality: population based cohort study. *BMJ* **2019**; 364:l525.
9. Costelloe C, Metcalfe C, Lovering A, Mant D, Hay AD. Effect of antibiotic prescribing in primary care on antimicrobial resistance in individual patients: Systematic review and meta-analysis. *BMJ (Online)* **2010**; 340:c2096.
10. Herrett E, Gallagher AM, Bhaskaran K, et al. Data Resource Profile: Clinical Practice Research Datalink (CPRD). *Int J Epidemiol* **2015**; 44:827–836.
11. Jones KH, Ford DV, Lyons RA. The SAIL Databank: 10 years of spearheading data privacy and research utility, 2007-2017. Swansea University Medical School, Ysgol Feddygaeth Prifysgol Abertawe **2017**; :15.
12. University of Manchester, Institute of Population Health. ClinicalCodes Repository. Available at: <https://clinicalcodes.rss.mhs.man.ac.uk/>. Accessed 6 February 2020.
13. Charlson ME, Pompei P, Ales KL, MacKenzie CR. A new method of classifying prognostic comorbidity in longitudinal studies: Development and validation. *Journal of Chronic Diseases* **1987**; 40:373–383.
14. English indices of multiple deprivation 2015: technical report. Available at: <https://www.gov.uk/government/publications/english-indices-of-deprivation-2015-technical-report>. Accessed 6 February 2020.
15. Babyak MA. Rescaling continuous predictors in regression models. *Statistical Tips from the Editors of Psychosomatic Medicine*. 2009; Available at: <http://stattips.blogspot.com/2009/08/rescaling-continuous-predictors-in.html>. Accessed 6

1  
2  
3 February 2020.

4 16. Gordon M, Lumley T. Advanced Forest Plot Using 'grid' Graphics. 2017. Available at:  
5 <https://cran.r-project.org/web/packages/forestplot/forestplot.pdf>.

6 17. Wickham H, François R, Henry L, Müller K. A Grammar of Data Manipulation;  
7 Package 'dplyr'. 2019. Available at: <https://cran.r-project.org/web/packages/dplyr/dplyr.pdf>.

8 18. Ripley B, Venables B, Bates DM, Hornik K, Gebhardt A, Firth D. Support Functions  
9 and Datasets for Venables and Ripley's MASS. 2019. Available at: <https://cran.r-project.org/web/packages/MASS/MASS.pdf>.

10 19. Hope EC, Crump RE, Hollingsworth TD, Smieszek T, Robotham J V., Pouwels KB.  
11 Identifying English Practices that Are High Antibiotic Prescribers Accounting for  
12 Comorbidities and Other Legitimate Medical Reasons for Variation. *EClinicalMedicine* **2018**;

13 20. Yoshikawa TT. Epidemiology and Unique Aspects of Aging and Infectious Diseases.  
14 *Clin Infect Dis* **2000**; 30:931–933.

15 21. Little P, Gould C, Williamson I, Warner G, Gantley M, Kinmonth AL. Reattendance  
16 and complications in a randomised trial of prescribing strategies for sore throat: the  
17 medicalising effect of prescribing antibiotics. *BMJ* **1997**; 315:350.

18 22. Butler CC, Simpson SA, Dunstan F, et al. Effectiveness of multifaceted educational  
19 programme to reduce antibiotic dispensing in primary care: practice based randomised  
20 controlled trial. *BMJ* **2012**; 344:d8173.

21 23. Royal College of General Practitioners. TARGET antibiotics: Treat Antibiotics  
22 Responsibly, Guidance, Education, Tools. 2013. Available at: <http://www.rcgp.org.uk/clinical-and-research/toolkits/target-antibiotic-toolkit.aspx>. Accessed 14 May 2018.

23 24. NHS England. Quality Premium: Guidance for 2017-19. 2018: 1–32. Available at:  
24 <https://www.england.nhs.uk/ccg-out-tool/qual-prem/>. Accessed 14 May 2019.

25 25. Bou-Antoun S, Costelloe C, Honeyford K, et al. Age-related decline in antibiotic  
26 prescribing for uncomplicated respiratory tract infections in primary care in England following  
27 the introduction of a national financial incentive (the Quality Premium) for health  
28 commissioners to reduce use of antibiotic. *Journal of Antimicrobial Chemotherapy* **2018**;  
29 73:2883–2892.

30 26. Moore M, Stuart B, Lown M, et al. Predictors of adverse outcomes in uncomplicated  
31 lower respiratory tract infections. *Annals of Family Medicine* **2019**;

32 27. Little P, Stuart B, Hobbs FDR, et al. Antibiotic prescription strategies for acute sore  
33 throat: A prospective observational cohort study. *The Lancet Infectious Diseases* **2014**;

34 28. Del Mar CB, Glasziou PP. Antibiotics for sore throats? *Journal of Paediatrics and  
35 Child Health* **1998**; 34:498–499.

36 29. Venekamp RP, Sanders SL, Glasziou PP, Del Mar CB, Rovers MM. Antibiotics for  
37 acute otitis media in children. *Cochrane Database of Systematic Reviews* **2015**;

38 30. Little P, Stuart B, Richard Hobbs FD, et al. Predictors of suppurative complications  
39 for acute sore throat in primary care: Prospective clinical cohort study. *BMJ (Online)* **2013**;  
40 347:f6867.

## TABLES

**Table 1. Demographic and characteristics of the GP practices included in CPRD, CPRD-HES, and SAIL datasets. The CPRD dataset covers England, Scotland, and Northern Island. CPRD-HES covers England only. SAIL databank covers Wales only.**

|                                                          | CPRD<br>n= 546 | CPRD-HES linked<br>n= 346 | SAIL<br>n= 338 |
|----------------------------------------------------------|----------------|---------------------------|----------------|
| Consultations                                            |                |                           |                |
| Upper Respiratory Tract Infection (URTI)                 | 9,646,774      | 5,698,611                 | 1,956,752      |
| Lower Respiratory Tract Infection (LRTI)                 | 2,288,616      | 1,321,593                 | 435,929        |
| Otitis Externa                                           | 1,166,023      | 708,465                   | 183,843        |
| Otitis Media                                             | 864,791        | 529,946                   | 215,495        |
| Sinusitis                                                | 707,736        | 422,638                   | 97,636         |
| Urinary Tract Infection (UTI)                            | 1,511,176      | 881,957                   | 263,921        |
| Age (mean, sd)                                           | 38.50 (3.86)   | 38.47 (3.72)              | 30.17 (7.11)   |
| Sex female (%)                                           | 58.98          | 59.06                     | 56.25          |
| Charlson comorbidity index (CCI) (mean (%))              |                |                           |                |
| None (0)                                                 | 65.80          | 66.16                     | 77.28          |
| Low (1-2)                                                | 27.41          | 27.24                     | 18.39          |
| Medium (3-4)                                             | 5.10           | 4.97                      | 3.24           |
| High (5-6)                                               | 1.25           | 1.19                      | 0.81           |
| Very high (>7)                                           | 0.45           | 0.44                      | 0.28           |
| Region (count, %)                                        |                |                           |                |
| North England                                            | 109 (20.0%)    | 83 (24.0%)                | -              |
| Midlands                                                 | 120 (22.0%)    | 87 (25.1%)                | -              |
| South England                                            | 158 (28.9%)    | 124 (35.8%)               | -              |
| London                                                   | 67 (12.3%)     | 52 (15.0%)                | -              |
| Devolved Administrations (Northern Ireland and Scotland) | 92 (16.8%)     | -                         | -              |
| Wales                                                    | -              | -                         | 338 (100%)     |
| Socioeconomic status (mean (%))                          |                |                           |                |
| 1 least deprived                                         | 13.29          | 20.98                     | 23.77          |
| 2                                                        | 14.25          | 22.49                     | 21.36          |
| 3                                                        | 12.49          | 19.71                     | 21.17          |
| 4                                                        | 12.47          | 19.68                     | 17.65          |
| 5 most deprived                                          | 10.17          | 16.05                     | 16.05          |
| Missing data                                             | 37.32          | 1.09                      | -              |
| Hospitalisation in previous year (mean (%))              | 0.02           | 0.02                      | 0.03           |
| GPs per 1000 consults (mean, sd)                         | 3.54 (2.30)    | 3.52 (2.25)               | NA             |

Footnote table 1. GP count per 1000 consults was not available in SAIL databank.

**Table 2. Rates of infection-related complications and or hospital admission in the 30 days after GP visit for common infection. Hospital admission was identified from the linked HES data. GP-recorded infection-related complications were identified from the electronic health records, which included any revisit to the GP for complications after the initial consultation.**

| Infection-related complications            | Number of cases (30 day follow-up) | Sum person-months (30 day follow-up) | Rate and 95% CI (per 1000 person-month) |
|--------------------------------------------|------------------------------------|--------------------------------------|-----------------------------------------|
| Infection-related complication GP-recorded |                                    |                                      |                                         |
| CPRD                                       | 25,721                             | 19,220,606                           | 1.34 (1.32 - 1.35)                      |
| SAIL                                       | 15,192                             | 3,718,739                            | 4.09 (4.02 - 4.15)                      |
| Hospital admission                         |                                    |                                      |                                         |
| CPRD-HES linked                            | 17,810                             | 12,335,982                           | 1.44 (1.42 - 1.47)                      |
| SAIL-HES                                   | 19,796                             | 3,900,897                            | 5.08 (5.00 - 5.15)                      |

**Table 2. Antibiotic prescribing rates for each common infection across practices included in CPRD (n=546), CPRD-HES (n=346), and SAIL (n=338). Rates are presented for six common infections. Proportion of consultations with antibiotics prescribed is presented with the mean percentage and the 5<sup>th</sup> through 95<sup>th</sup> percentile at practice level. The mean percentage of antibiotic prescribed in CPRD after a consultation for URTI was 46.1%.**

|                                                                                     | Mean % (sd)   | 5 %   | 25 %  | 50 %  | 75 %  | 95 %  |
|-------------------------------------------------------------------------------------|---------------|-------|-------|-------|-------|-------|
| Upper Respiratory Tract Infection (URTI);<br>URTI, cough or cold, sore throat       |               |       |       |       |       |       |
| CPRD                                                                                | 46.14 (11.71) | 28.59 | 38.25 | 45.14 | 53.73 | 66.36 |
| CPRD-HES linked                                                                     | 43.74 (10.97) | 28.88 | 38.17 | 45.15 | 53.09 | 63.97 |
| SAIL                                                                                | 43.37 (12.07) | 24.83 | 34.57 | 42.88 | 51.76 | 63.43 |
| Lower Respiratory Tract Infection (LRTI);<br>Excluding community acquired pneumonia |               |       |       |       |       |       |
| CPRD                                                                                | 84.79 (8.89)  | 69.79 | 81.45 | 86.68 | 90.52 | 94.40 |
| CPRD-HES linked                                                                     | 85.24 (8.03)  | 70.89 | 81.90 | 86.80 | 90.57 | 94.68 |
| SAIL                                                                                | 78.11 (11.66) | 55.47 | 71.56 | 80.45 | 86.69 | 93.17 |
| Otitis Externa                                                                      |               |       |       |       |       |       |
| CPRD                                                                                | 26.33 (8.98)  | 15.34 | 20.00 | 24.55 | 31.00 | 42.70 |
| CPRD-HES linked                                                                     | 26.52 (8.44)  | 15.34 | 20.13 | 25.16 | 31.37 | 41.57 |
| SAIL                                                                                | 29.57 (10.65) | 14.92 | 22.03 | 28.71 | 34.89 | 48.5  |
| Otitis Media                                                                        |               |       |       |       |       |       |
| CPRD                                                                                | 78.10 (10.86) | 58.35 | 73.05 | 80.27 | 86.09 | 91.57 |
| CPRD-HES linked                                                                     | 78.27 (9.83)  | 59.20 | 73.35 | 79.51 | 85.81 | 91.30 |
| SAIL                                                                                | 78.49 (11.81) | 54.91 | 72.64 | 80.57 | 87.49 | 92.65 |
| Sinusitis                                                                           |               |       |       |       |       |       |
| CPRD                                                                                | 84.97 (8.93)  | 67.89 | 82.48 | 87.13 | 90.29 | 94.43 |
| CPRD-HES linked                                                                     | 85.75 (7.88)  | 70.07 | 83.20 | 87.60 | 90.63 | 94.57 |
| SAIL                                                                                | 82.12 (9.91)  | 63.36 | 77.44 | 84.22 | 88.89 | 94.73 |
| Urinary Tract Infection (UTI)                                                       |               |       |       |       |       |       |
| CPRD                                                                                | 85.90 (7.39)  | 74.01 | 82.96 | 87.28 | 90.98 | 93.72 |
| CPRD-HES linked                                                                     | 86.06 (6.40)  | 74.08 | 83.19 | 87.01 | 90.79 | 93.30 |
| SAIL                                                                                | 81.50 (10.30) | 61.46 | 76.70 | 84.66 | 88.65 | 93.18 |



Figures

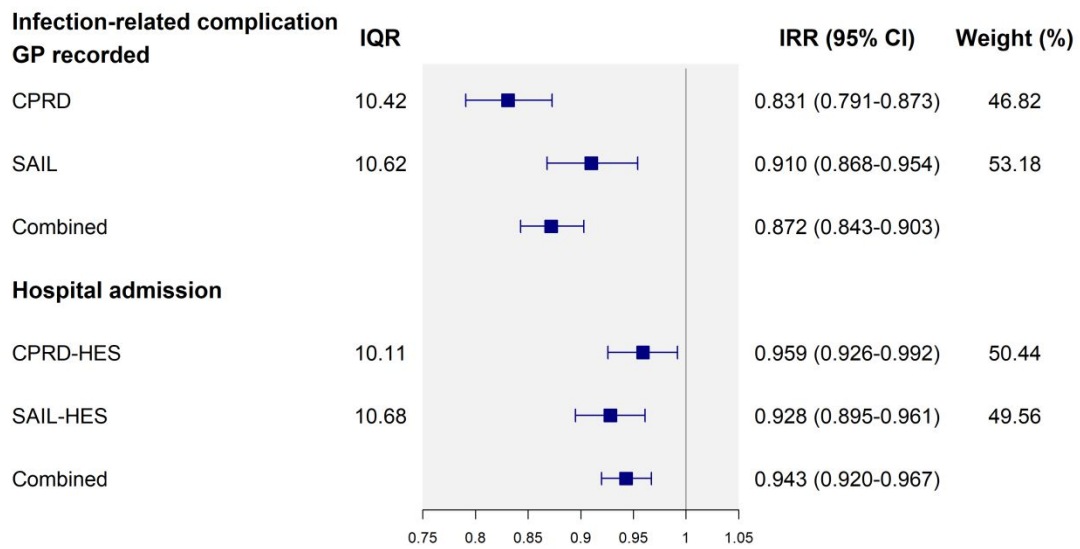

Figure 1. Incidence rate ratios (IRR) and 95% confidence interval (CI) of GP-recorded infection-related complications and hospital admissions comparing antibiotic prescribing at 75th to 25th percentile (IQR). Results are presented by data source. CPRD and SAIL effect estimates were combined using a fixed-effect meta-analysis method.



1  
2  
3  
4  
5  
6  
7  
8  
9  
10  
11  
12  
13  
14  
15  
16  
17  
18  
19  
20  
21  
22  
23  
24  
25  
26  
27  
28  
29  
30  
31  
32  
33  
34  
35  
36  
37  
38  
39  
40  
41  
42  
43  
44  
45  
46  
47  
48  
49  
50  
51  
52  
53  
54  
55  
56  
57  
58  
59  
60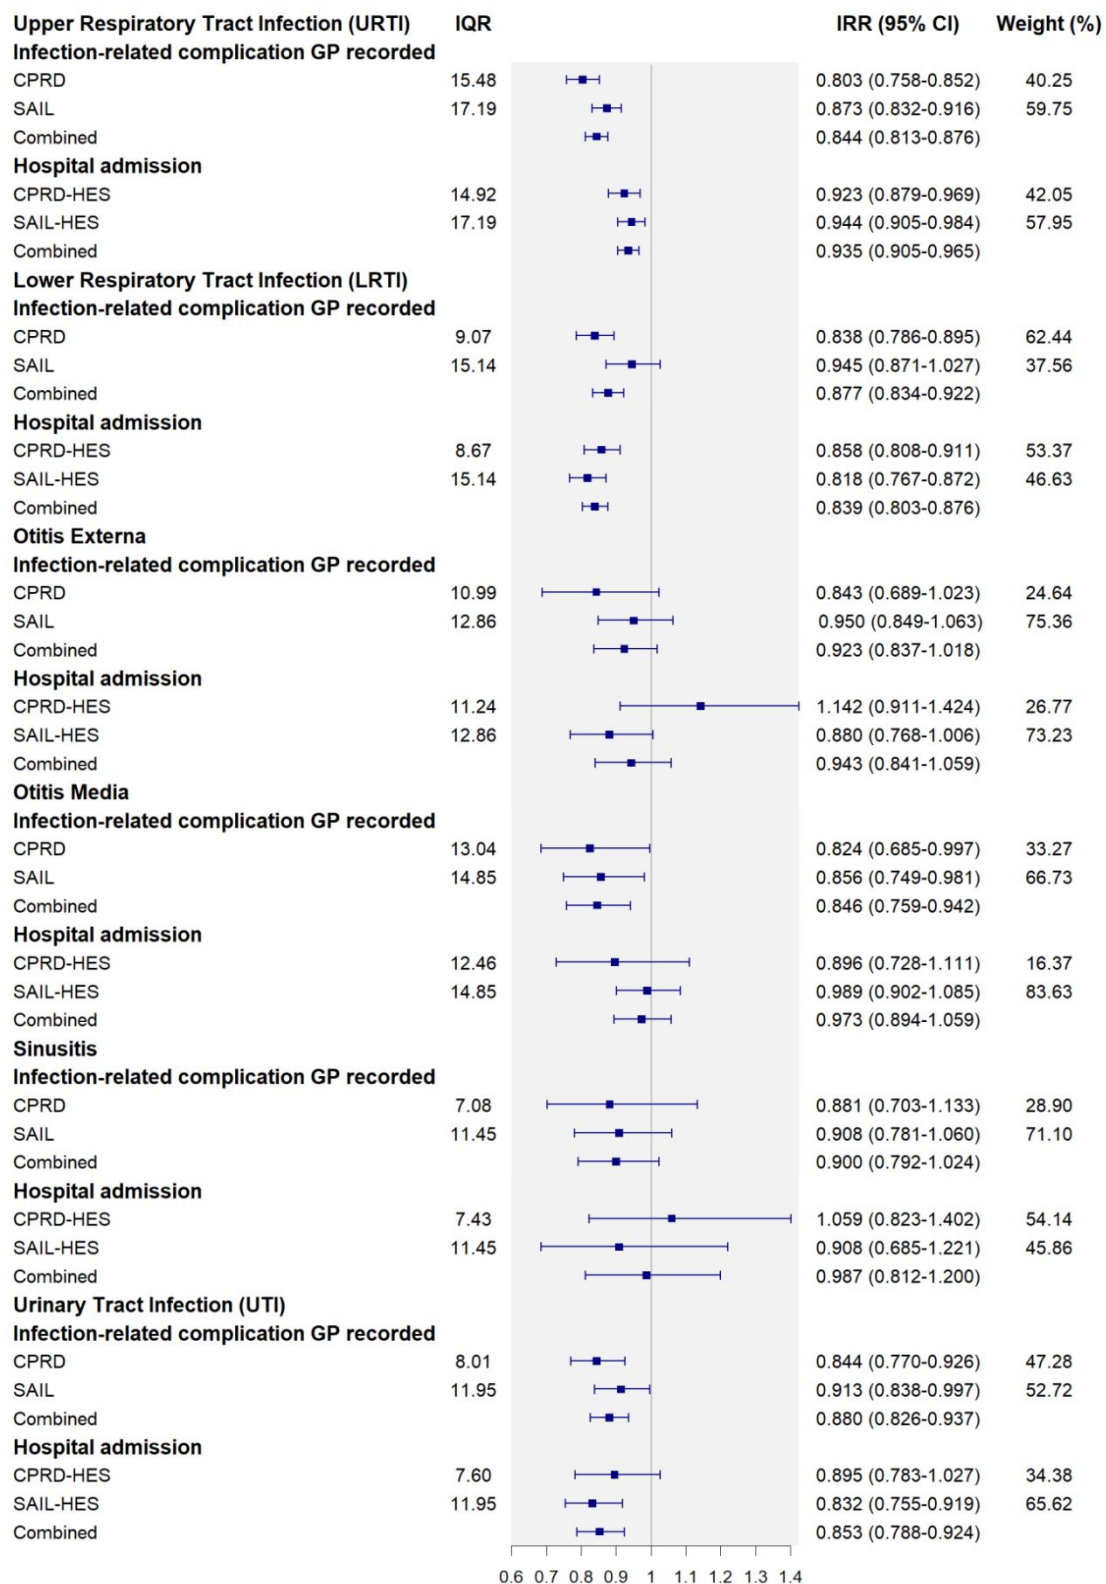

**Figure 2. Effect estimates (IRRs and 95% CI) of GP-recorded infection-related complications and hospital admissions. Analyses compared antibiotic prescribing at 75th and 25th percentile (IQR) by 6 common infections. The IRR for hospital admission after a consultation for URTI in CPRD-HES was 0.923. This means for an 14.9% increase in antibiotic prescribing the rate of hospital admission is reduced by 7.7%.**

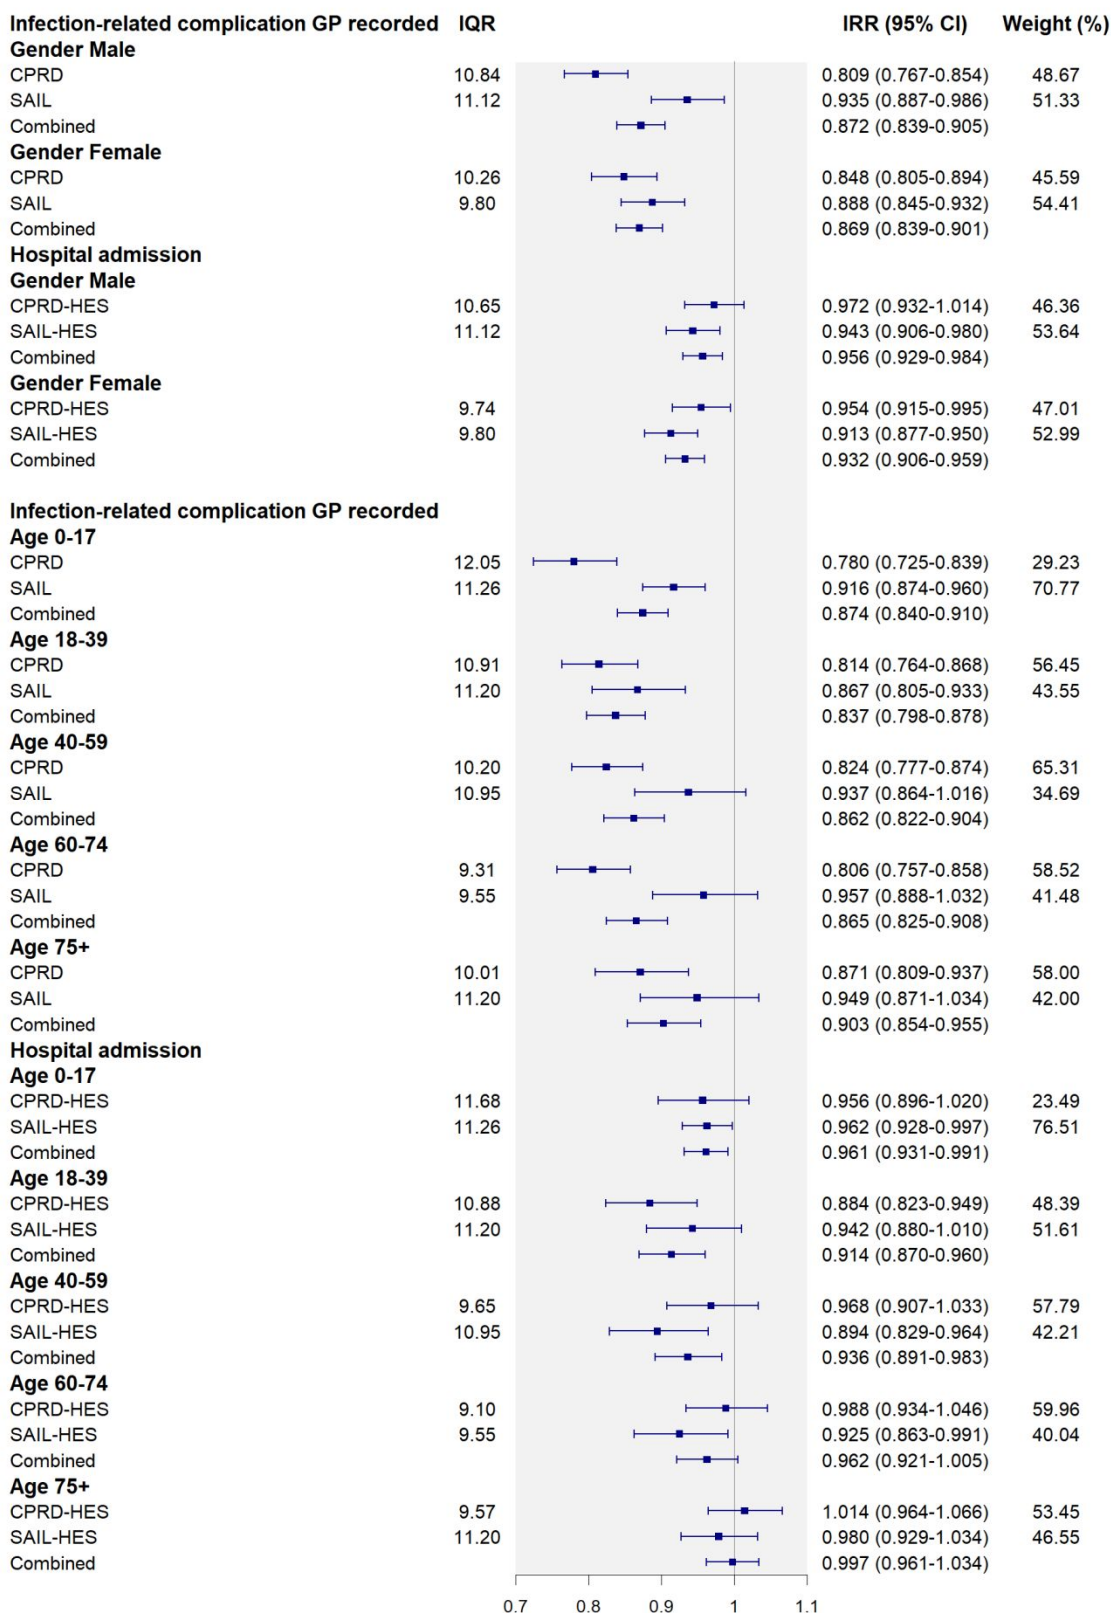

**Figure 3. Association of GP-recorded infection-related complications and hospital admissions comparing practice antibiotic prescribing at 75th and 25th percentile (IQR) by gender and age groups. Weights are from fixed-effects analysis.**

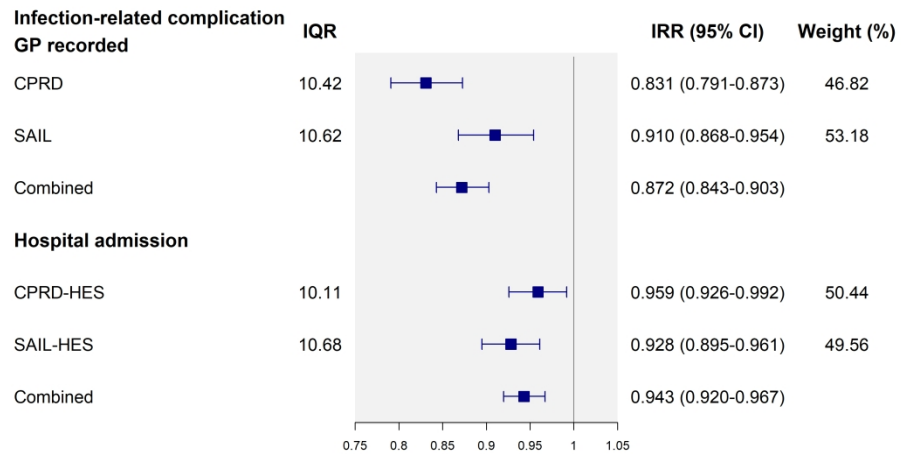

Figure 1. Incidence rate ratios (IRR) and 95% confidence interval (CI) of GP-recorded infection-related complications and hospital admissions comparing antibiotic prescribing at 75th to 25th percentile (IQR). Results are presented by data source. CPRD and SAIL effect estimates were combined using a fixed-effect meta-analysis method.

304x162mm (300 x 300 DPI)

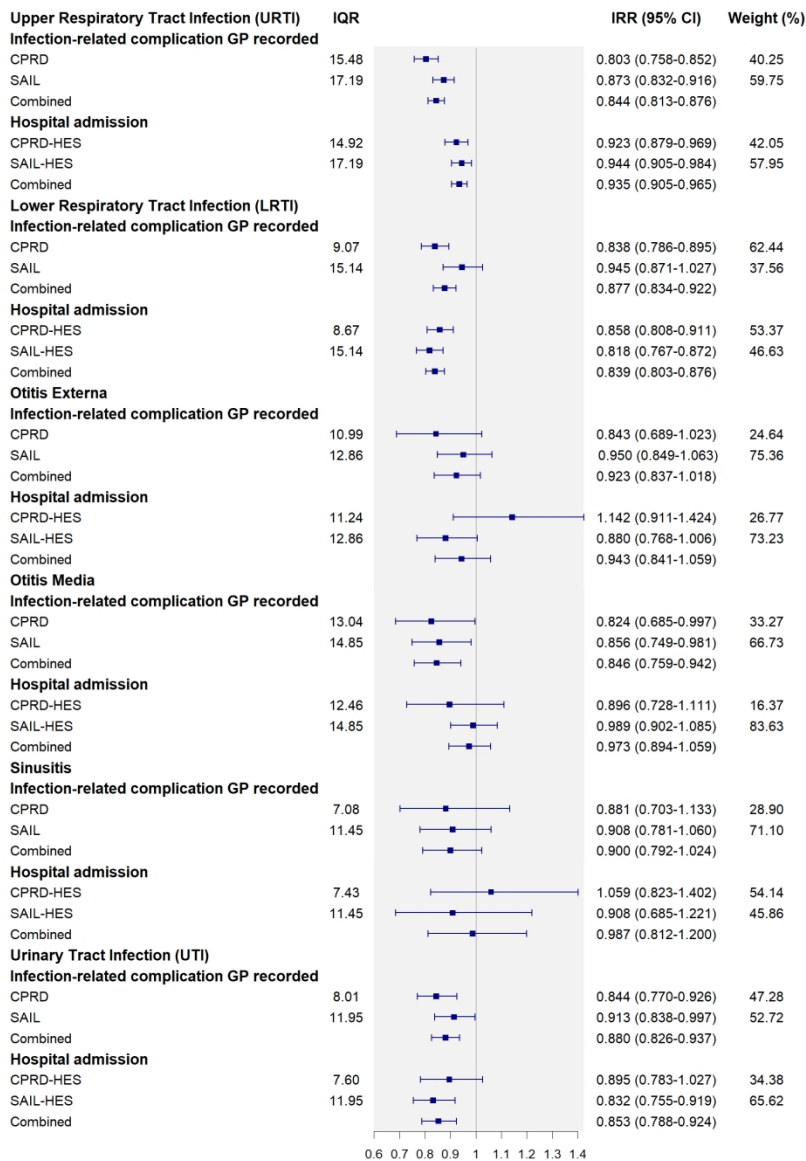

Figure 2. Effect estimates (IRRs and 95% CI) of GP-recorded infection-related complications and hospital admissions. Analyses compared antibiotic prescribing at 75th and 25th percentile (IQR) by 6 common infections. The IRR for hospital admission after a consultation for URTI in CPRD-HES was 0.923. This means for an 14.9% increase in antibiotic prescribing the rate of hospital admission is reduced by 7.7%.

330x457mm (150 x 150 DPI)

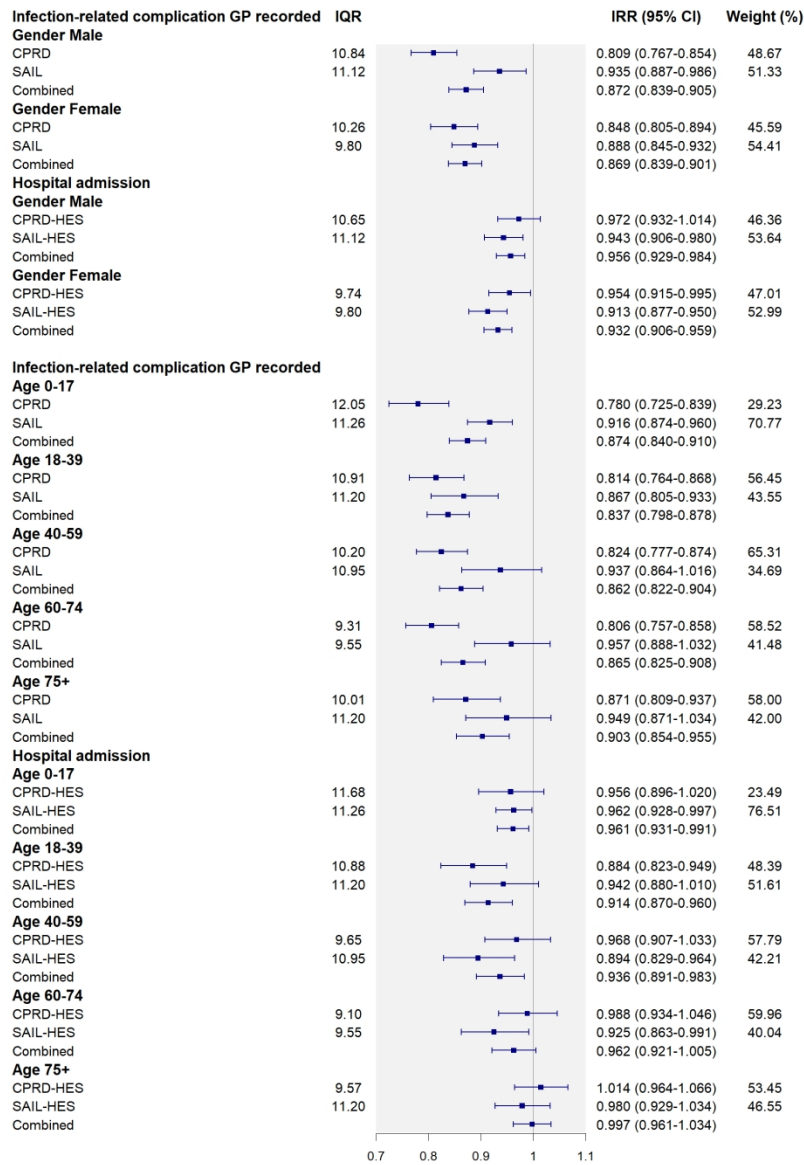

Figure 3. Association of GP-recorded infection-related complications and hospital admissions comparing practice antibiotic prescribing at 75th and 25th percentile (IQR) by gender and age groups. Weights are from fixed-effects analysis.

330x457mm (150 x 150 DPI)



## Supplementary Material

### Appendix 1. Summary counts of infection-related hospital admission types as recorded as hospital admission codes in the primary care records.

**Table S1. Summary counts of distribution of infection-related complications based on hospital admission codes in CPRD-HES. Table shows counts from CPRD-HES by sex and age for multiple infection-related complications.**

| CPRD-HES                                         | All   | Male  | Female | Age 0-17 | Age 18-39 | Age 40-59 | Age 60-74 | Age 75+ |
|--------------------------------------------------|-------|-------|--------|----------|-----------|-----------|-----------|---------|
| Cough/Cold                                       | 103   | 60    | 43     | 96       | <5        | <5        | <5        | <5      |
| LRTI/Pneumonia                                   | 13543 | 6026  | 7527   | 2515     | 877       | 1681      | 2418      | 6056    |
| Otitis externa                                   | 67    | 29    | 38     | 12       | 18        | 16        | 10        | 10      |
| Otitis media                                     | 432   | 223   | 209    | 236      | 64        | 64        | 47        | 18      |
| Sinusitis                                        | 46    | 16    | 31     | 7        | 7         | 15        | 14        | <5      |
| Sore Throat                                      | 2000  | 1066  | 932    | 481      | 1085      | 357       | 58        | 17      |
| URTI                                             | 695   | 375   | 319    | 509      | 47        | 42        | 36        | 62      |
| UTI                                              | 112   | 39    | 73     | <5       | 36        | 12        | 27        | 38      |
| Sepsis                                           | 397   | 183   | 214    | 16       | 16        | 31        | 85        | 249     |
| Meningitis                                       | 45    | 18    | 27     | 13       | 11        | 10        | 5         | 6       |
| Infection-related complication, protocol defined | 17810 | 8234  | 9580   | 3673     | 2226      | 2464      | 2890      | 6562    |
| Any hospitalisation, not infection specific      | 77704 | 34050 | 43695  | 8196     | 7865      | 11990     | 18640     | 31030   |

Note 1: the sum of specific infections does not add up to sum of infection-related complications protocol defined due to a subset of patients having multiple infection-related complication admission codes. Note 2: the sum of Male and Female, and the sum of the age categories may not add up to the sum of 'All' due to some missingness in gender or year-of-birth registration in the patient's medical records.

### Appendix 2. Sensitivity analysis of continuous antibiotic prescribing rate

A sensitivity analysis was performed to determine if treating the antibiotic prescribing rate continuously is justified. The rate of infection-related hospital admission and antibiotic prescribing rate was modelled with negative binomial regression. The antibiotic prescribing rate was decile ranked to create 10 equally sized subsections. These deciles were modelled in the exact same way as the main analyses presented in this paper. First, second, and third degree polynomials were fitted on the deciled antibiotic rate and evaluated against the IRRs for infection-related complication as recorded by the GP ('A', 'B', 'C') and for infection-related hospital admission ('D', 'E', 'F'). For both outcomes the first order polynomials were the preferred models. Figure S1 Plot A shows a strong linear trend for between low prescribing

at deciles 1 to 3 and high prescribing at deciles 8 to 10. Although the error bars of each point estimate overlap a downward linear trend is observable. Creating categories of the antibiotic prescribing rate may hide significant variability within each specific category. Treating the antibiotic prescribing rate continuously ensures that each GP practice is analysed separately against the outcomes of interest.

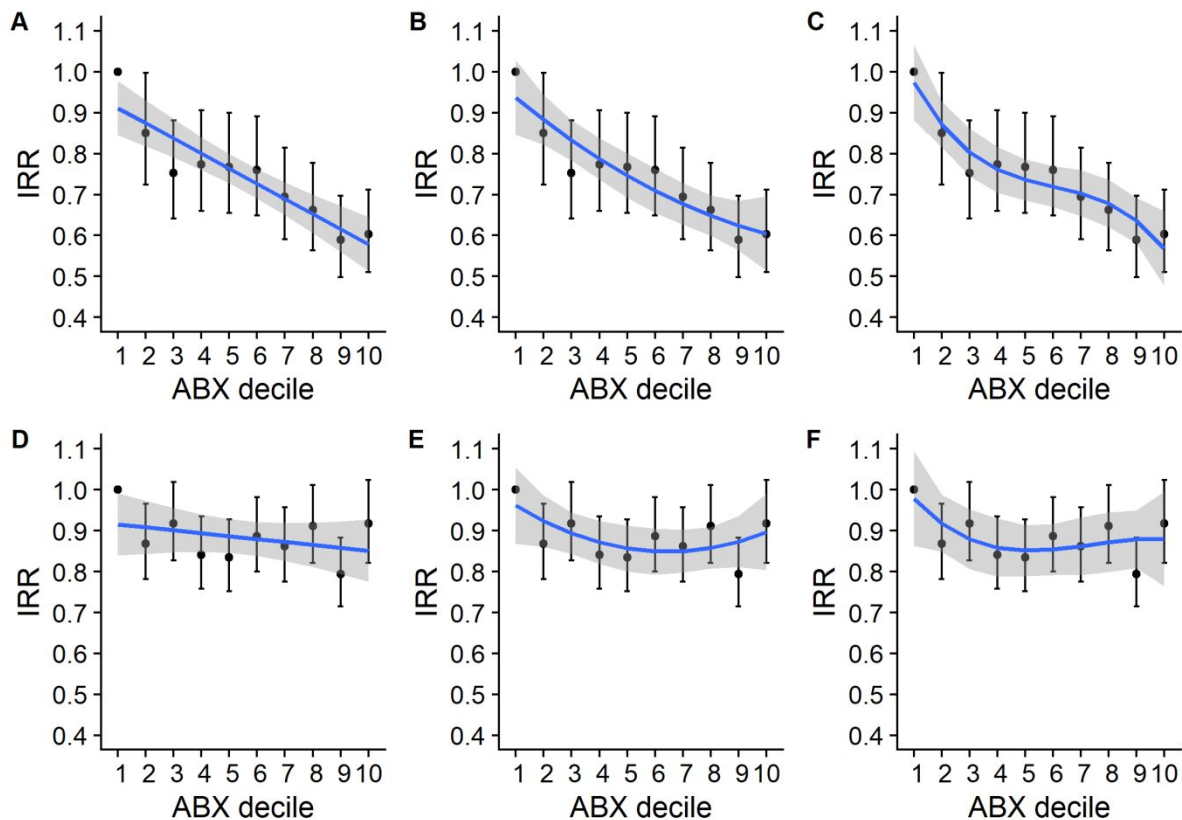

**Figure s1. First (left), second (middle), and third (right) degree polynomials fitted on the deciled antibiotic prescribing rate. Plot A, B, and C model outcome infection-related complication as recorded by the GP. Plot D, E, and F model outcome infection-related hospital admission.**

# BMJ Open

## Infection-related complications after common infection in association with new antibiotic prescribing in primary care: retrospective cohort study using linked electronic health records

|                                 |                                                                                                                                                                                                                                                                                                                                                                                                                                                                                                                                                                                                                                                                                         |
|---------------------------------|-----------------------------------------------------------------------------------------------------------------------------------------------------------------------------------------------------------------------------------------------------------------------------------------------------------------------------------------------------------------------------------------------------------------------------------------------------------------------------------------------------------------------------------------------------------------------------------------------------------------------------------------------------------------------------------------|
| Journal:                        | <i>BMJ Open</i>                                                                                                                                                                                                                                                                                                                                                                                                                                                                                                                                                                                                                                                                         |
| Manuscript ID                   | bmjopen-2020-041218.R1                                                                                                                                                                                                                                                                                                                                                                                                                                                                                                                                                                                                                                                                  |
| Article Type:                   | Original research                                                                                                                                                                                                                                                                                                                                                                                                                                                                                                                                                                                                                                                                       |
| Date Submitted by the Author:   | 01-Sep-2020                                                                                                                                                                                                                                                                                                                                                                                                                                                                                                                                                                                                                                                                             |
| Complete List of Authors:       | van Bodegraven, Birgitta; The University of Manchester, Health e-Research Centre<br>Palin, Victoria ; The University of Manchester, Health e-Research Centre<br>Mistry, Chirag; The University of Manchester, Health e-Research Centre<br>Sperrin, Matthew; The University of Manchester, Health e-Research Centre<br>White , Andrew; NHS Greater Manchester Shared Service<br>Welfare, William; Public Health England, North West<br>Ashcroft, Darren; The University of Manchester, Centre for Pharmacoepidemiology and Drug Safety, NIHR Greater Manchester Patient Safety Translational Research Centre<br>van Staa, Tjeerd; The University of Manchester, Health e-Research Centre |
| <b>Primary Subject Heading</b>: | General practice / Family practice                                                                                                                                                                                                                                                                                                                                                                                                                                                                                                                                                                                                                                                      |
| Secondary Subject Heading:      | Public health, Infectious diseases, Epidemiology                                                                                                                                                                                                                                                                                                                                                                                                                                                                                                                                                                                                                                        |
| Keywords:                       | EPIDEMIOLOGY, INFECTIOUS DISEASES, Quality in health care < HEALTH SERVICES ADMINISTRATION & MANAGEMENT, Health policy < HEALTH SERVICES ADMINISTRATION & MANAGEMENT, Health informatics < BIOTECHNOLOGY & BIOINFORMATICS                                                                                                                                                                                                                                                                                                                                                                                                                                                               |
|                                 |                                                                                                                                                                                                                                                                                                                                                                                                                                                                                                                                                                                                                                                                                         |

SCHOLARONE™  
Manuscripts





I, the Submitting Author has the right to grant and does grant on behalf of all authors of the Work (as defined in the below author licence), an exclusive licence and/or a non-exclusive licence for contributions from authors who are: i) UK Crown employees; ii) where BMJ has agreed a CC-BY licence shall apply, and/or iii) in accordance with the terms applicable for US Federal Government officers or employees acting as part of their official duties; on a worldwide, perpetual, irrevocable, royalty-free basis to BMJ Publishing Group Ltd ("BMJ") its licensees and where the relevant Journal is co-owned by BMJ to the co-owners of the Journal, to publish the Work in this journal and any other BMJ products and to exploit all rights, as set out in our [licence](#).

The Submitting Author accepts and understands that any supply made under these terms is made by BMJ to the Submitting Author unless you are acting as an employee on behalf of your employer or a postgraduate student of an affiliated institution which is paying any applicable article publishing charge ("APC") for Open Access articles. Where the Submitting Author wishes to make the Work available on an Open Access basis (and intends to pay the relevant APC), the terms of reuse of such Open Access shall be governed by a Creative Commons licence – details of these licences and which [Creative Commons](#) licence will apply to this Work are set out in our licence referred to above.

Other than as permitted in any relevant BMJ Author's Self Archiving Policies, I confirm this Work has not been accepted for publication elsewhere, is not being considered for publication elsewhere and does not duplicate material already published. I confirm all authors consent to publication of this Work and authorise the granting of this licence.

1  
2  
3  
4 **Infection-related complications after common infection in**  
5  
6 **association with new antibiotic prescribing in primary care:**  
7  
8 **retrospective cohort study using linked electronic health records**  
9  
10

11  
12 Birgitta van Bodegraven<sup>1</sup> (0000-0002-8359-9017), Victoria Palin<sup>1</sup> (0000-0002-0851-8619),  
13  
14 Chirag Mistry<sup>1</sup>, Matthew Sperrin<sup>1</sup> (0000-0002-5351-9960), Andrew White<sup>2</sup>, William Welfare<sup>3</sup>  
15  
16 (0000-0002-8304-1048), Darren M Ashcroft<sup>4</sup> (0000-0002-2958-915X), Tjeerd Pieter van  
17  
18 Staa<sup>1,5</sup> (0000-0001-9363-742X)  
19

20  
21 <sup>1</sup> Health e-Research Centre, Health e-Research Centre, School of Health Sciences, Faculty of  
22  
23 Biology, Medicine and Health, The University of Manchester, Oxford Road, Manchester, M13 9PL, UK  
24

25 <sup>2</sup> NHS Greater Manchester Shared Service, Ellen House, Waddington Street, Oldham, OL9 6EE, UK  
26

27 <sup>3</sup> Public Health England North West, 3 Piccadilly Place, London Road, Manchester, M1 3BN, UK  
28

29  
30 <sup>4</sup> Centre for Pharmacoepidemiology and Drug Safety, NIHR Greater Manchester Patient Safety  
31  
32 Translational Research Centre, School of Health Sciences, Faculty of Biology, Medicine and Health,  
33  
34 Manchester Academic Health Science Centre (MAHSC), The University of Manchester, Oxford Road,  
35  
36 Manchester, M13 9PL, UK  
37

38 <sup>5</sup> Utrecht Institute for Pharmaceutical Sciences, Utrecht University, Utrecht, the Netherlands  
39

40  
41 **Correspondence to:** Birgitta van Bodegraven, birgitta.vanbodegraven@manchester.ac.uk,  
42  
43 alternative: Tjeerd van Staa, tjeerd.vanstaa@manchester.ac.uk  
44

45  
46 **Keywords:** Antibiotic prescription, hospitalisation, infection-related complications, common  
47  
48 infection, primary care  
49

50  
51 **Word count:** 3786  
52  
53  
54  
55  
56  
57  
58  
59  
60

## ABSTRACT

**Objective** Determine the association of incident antibiotic prescribing levels for common infections with infection-related complications and hospitalisations by comparing high with low prescribing GP practices.

**Design** Retrospective cohort study.

**Data source** UK primary care records from the Clinical Practice Research Datalink (CPRD GOLD) and SAIL Databank (SAIL) linked with Hospital Episode Statistics (HES) data, including 546 CPRD, 346 CPRD-HES and 338 SAIL-HES practices.

**Exposures** Initial general practice visit for one of six common infections and the proportion of antibiotic prescribing in each practice.

**Main outcome measures** Incidence of infection-related complications (as recorded in general practice) or infection-related hospital admission within 30 days after consultation for a common infection.

**Results** A practice with 10.4% higher antibiotic prescribing (the interquartile range (IQR)) was associated with a 5.7% lower rate of infection-related hospital admissions (adjusted analysis, 95% Confidence Interval 3.3% to 8.0%). The association varied by infection with larger associations in hospital admissions with lower respiratory tract infection (16.1%; 12.4% to 19.7%) and urinary tract infection (14.7%; 7.6% to 21.1%) and smaller association in hospital admissions for upper respiratory tract infection (6.5%; 3.5% to 9.5%) The association of antibiotic prescribing levels and hospital admission was largest in patients aged 18-39 (8.6%; 4.0% to 13.0%) and smallest in the elderly aged 75+ (0.3%; -3.4% to 3.9%).

**Conclusions** There is an association between lower levels of practice level antibiotic prescribing and higher infection-related hospital admissions. Indiscriminately reducing antibiotic prescribing may lead to harm. Greater focus is needed to optimise antibiotic use by

1  
2  
3 reducing inappropriate antibiotic prescribing and better targeting antibiotics to patients at  
4 high risk of infection-related complications.  
5  
6  
7

## 8 **ARTICLE SUMMARY**

### 9 **Strengths and limitations of this study**

- 10 • Two large primary care databases with linked hospitalisation data were used to evaluate  
11 the difference in hospital admission after community acquired common infections  
12 comparing high with low prescribing GP practices.
- 13 • This analysis focusses on antibiotic prescribing at practice level with the emphasis on  
14 evaluating governmental guidance on reducing overall prescribing.
- 15 • Incidental antibiotic prescriptions without details on local antibiotic resistance levels were  
16 evaluated in this analysis and the results can only be interpreted in this context.
- 17 • No data was extracted on infection severity or symptom scores therefore no conclusions  
18 can be drawn on the appropriateness of antibiotics prescribed.

### 19 **INTRODUCTION**

20  
21  
22  
23  
24  
25  
26  
27  
28  
29  
30  
31  
32  
33  
34  
35 Common infections, such as sore throat or sinusitis, are often self-limiting and usually get  
36 better without antibiotics; nevertheless, they are frequently prescribed [1,2]. Research  
37 regarding antimicrobial resistance (AMR) and antibiotic prescribing rates often focuses on  
38 reducing inappropriate prescribing to lower the threat of increasing antimicrobial resistance  
39 [3]. Antibiotic prescribing for common self-limiting infections is often seen as a target for  
40 reduction [3,4]. However, a proportion of common infections are caused by bacterial  
41 infections that may progress and antibiotics may reduce infection-related adverse outcomes.  
42  
43  
44  
45  
46  
47  
48  
49

50 The UK AMR national action plan for 2019-2024 continues on from the last AMR strategy  
51 (2013-2018) with updated aims and targets to address the continued problem of resistance.  
52 One aim is to optimise antibiotic use through stewardship programmes, including a 25%  
53 reduction in antibiotic use in the community from the 2013 baseline [5]. Antibiotic prescribing  
54  
55  
56  
57  
58  
59  
60

1  
2  
3 in primary care in England shows a declining trend (-13.2%) between 2013 and 2017,  
4  
5 however, to reach desired reduction targets continued efforts are needed [3].  
6  
7

8 A small number of studies have analysed the relationship between antibiotic prescribing  
9  
10 rates and adverse events in primary care. Petersen *et al.* [6] (2007) and Gulliford *et al.* [7]  
11  
12 (2016) studied the relationship between antibiotic prescribing rates in primary care and  
13  
14 complication in patients with common respiratory tract infections (RTIs). Both studies  
15  
16 reported reductions in incidence of pneumonia, as recorded by the general practitioner (GP),  
17  
18 with higher levels of antibiotic prescribing. However, these studies did not evaluate the  
19  
20 association of prescribing rates with the rate of hospital admission after common infections  
21  
22 in primary care.  
23  
24

25 Gharbi *et al.* (2019) reported that prescribing immediate antibiotics in primary care to elderly  
26  
27 patients for urinary tract infection (UTI) was associated with a lower risk of bloodstream  
28  
29 infection, hospital admission, and all-cause mortality compared with no antibiotics and  
30  
31 deferred antibiotic prescribing [8]. However, antibiotic prescribing in primary care is known to  
32  
33 increase the risk of resistant infections [9]. This highlights the challenge in balancing  
34  
35 prescribing to reduce the risk of severe outcomes and limiting overall antibiotic consumption  
36  
37 to slow the development of AMR.  
38  
39

40 The association between practice antibiotic prescribing rates and the rate of hospital  
41  
42 admission after common infection when clearly separated from other infection-related  
43  
44 complications managed in the community has not previously been studied. There is  
45  
46 uncertainty with regards to the relationship between antibiotic prescribing levels and  
47  
48 complications that can arise after various common infections. The objective of this study was  
49  
50 to investigate the association between practice level antibiotic prescribing in primary care for  
51  
52 multiple common infections and the rate of infection-related complications through  
53  
54 comparison of high and low prescribing GP practices. These data provide insight into the  
55  
56 role of antibiotic prescribing patterns in controlling the rate of adverse events.  
57  
58  
59  
60

## **METHOD:**

### **Data sources**

The Clinical Practice Research Datalink (CPRD GOLD [10]) and the Secure Anonymised Information Linkage Databank (SAIL [11]) were used in this study. CPRD is a UK primary care database with routinely collected electronic health records [10]. All patients registered with a participating general practice are anonymously included in the dataset. Data has been collected from 1987 and represents about 8% of the UK population. CPRD is broadly representative of the general UK population in terms of age, sex, and ethnicity [10]. The SAIL databank is a data repository of anonymised personal data collected for research from 75% of Welsh general practices [11]. Within SAIL, individual GP practices share anonymised patient-level clinical information on symptoms, diagnoses and prescribed treatment. As Welsh GP practices are included in both CPRD and SAIL they have been removed from CPRD to avoid replication.

For both data sources, all patient level data was aggregated up to practice level. The final CPRD dataset contained 546 GP practices of which 346 (located in England only), were linked with hospital admitted patient care data (Hospital Episode Statistics (HES)). The SAIL Databank included 338 GP practices, all linked to HES.

### **Selection and eligibility criteria:**

The CPRD study population included patients with a consultation between 1st January 2000 and 30th June 2015; for SAIL, the time period was between 1st January 2000 and 31st December 2017. The study population included patients with an initial GP consultation and clinical Read code for a common infection. This was defined as the first incident consultation for a common infection within six months and without an antibiotic prescription in the previous one month. Six common infections were included: upper respiratory tract infection (URTI, cough or cold, sore throat), lower respiratory tract infection (LRTI), otitis externa, otitis media, sinusitis, and urinary tract infection (UTI).

1  
2  
3 Patients were eligible to be included if they were permanently registered at the GP practice,  
4 had a minimum of one year follow-up since data collection (except for children under one),  
5 and at least one record of an incident common infection. Male and females of any age were  
6 eligible. Patients were not required to have an antibiotic prescribed at the time of visit for  
7 common infection. Patients with an infection-related complication or an infection-related  
8 hospital admission in the six months prior or on the day of consultation were excluded.  
9  
10  
11  
12  
13  
14

### 15 16 **Exposure and outcomes:**

17  
18  
19 The number of patients who received an antibiotic at the consultation was determined. The  
20 practice antibiotic prescribing rate was the percentage of consultations that resulted in an  
21 antibiotic prescription in the complete study period.  
22  
23  
24

25  
26 Infection-related hospital admission was identified using the primary admission diagnosis  
27 using ICD-10 codes from the linked HES data. This outcome was evaluated using the  
28 CPRD-HES and SAIL-HES datasets. The second outcome evaluated was infection-related  
29 complications as recorded in the primary care records. Both outcomes were evaluated  
30 during the 30 days after the initial common infection consultation. In case of death or end of  
31 data collection within these 30 days, observations were censored. The outcomes were  
32 evaluated using the CPRD and SAIL datasets.  
33  
34  
35  
36  
37  
38  
39

40  
41 Person time at risk was calculated for the registered CPRD and SAIL population by counting  
42 the days without diagnosis of infection-related complications during the 30 day follow-up  
43 after the date of common infection. The rates of infection-related outcomes were calculated  
44 by dividing the number of events by the person time at risk (per 1000 person-month). The  
45 outcomes were identified based on pre-defined code lists. Compiled code lists are available  
46 on [clinicalcodes.org](http://clinicalcodes.org) [12]. The codes for outcomes and infections used were reviewed  
47 independently by two clinical epidemiologists. Infection-related hospital admission includes  
48 codes for admission such as for sepsis, endocarditis, acute respiratory tract infection, or  
49 bacterial meningitis. Infection-related complications as recorded in the primary care records  
50  
51  
52  
53  
54  
55  
56  
57  
58  
59  
60

1  
2  
3 includes any revisit to the GP for infection-related complications such as pneumonia, sepsis,  
4 quinsy, mastoiditis, or meningitis in the 30 day follow-up period.  
5  
6

### 7 8 **Confounders** 9

10 The proportion of socioeconomic status (SES) was derived from patients with linkage to IMD  
11 quintiles. Linked Index of Multiple Deprivation (IMD) data in quintiles based on patient's  
12 residential postcode were available for both datasets. Census based IMD data measures  
13 deprivation at area-level based on domains, such as income, employment, health, housing,  
14 and general environment [13].  
15  
16  
17  
18  
19

### 20 21 **Statistical analysis** 22

23 Infection-related complications were modelled with negative binomial regression using  
24 practice level antibiotic prescribing as a predictor and the log of person time at risk as an  
25 offset. The unit of analysis is the practice. The analysis was adjusted with the scaled mean  
26 at practice level of age, vaccination against influenza, and hospital admission in the previous  
27 year. Additionally, the analysis was adjusted with the scaled proportion of each category at  
28 practice level of the following categorical characteristic: Sex, Charlson Comorbidity Index  
29 [14], body mass index (BMI), smoking status (never, currently, past, unknown), and  
30 socioeconomic status (SES, least deprived to most deprived). Additionally, analyses using  
31 CPRD and CPRD-HES were adjusted with the mean at practice level of the number of GPs  
32 per 1000 consults, the patient transfer-out rate and region. No imputations or other  
33 adjustments were performed for missing characteristics in the covariates.  
34  
35  
36  
37  
38  
39  
40  
41  
42  
43  
44  
45  
46  
47

48 All variables were scaled with their associated interquartile range (IQR: 75th to 25th  
49 percentile) by dividing the original values by the IQR from the variable [15]. This creates a  
50 natural comparison between high and low prescribing GP practices. The antibiotic  
51 prescribing rate was modelled continuously. Because of the scaling the IQR becomes the  
52 unit that the effect size is expressed in. Both outcomes were compared against all common  
53 infections in the initial analysis. The association of each of the six common infections was  
54  
55  
56  
57  
58  
59  
60



1  
2  
3 then studied against both outcomes separately. The analyses were further stratified by  
4 gender and age categories: 0-17, 18-39, 40-59, 60-74, 75+ years old to evaluate the varied  
5 prescribing among these risk groups. The beta coefficient of the antibiotic prescribing rate  
6 was exponentiated and is presented as an incidence rate ratio (IRR). The effect estimates  
7 from the CPRD and SAIL cohorts were combined using a meta-analysis method with inverse  
8 variance weighting and DerSimonian and Laird random effect models.  
9  
10  
11  
12  
13  
14

15  
16 Absolute difference in antibiotic prescribing between high and low prescribing practices was  
17 calculated from the prescribing rates (25th and 75th percentiles) and mean events per  
18 practice. The absolute difference in infection-related complications between high and low  
19 prescribing was calculated using the complication rate and the IRR. The number needed to  
20 treat (NNT) with antibiotics to prevent one event of hospital admission was calculated by  
21 dividing the absolute difference in antibiotic prescribing by the absolute difference in  
22 complications. Forestplot [16], dplyr [17], and MASS [18] packages in R were used for the  
23 analysis. All analyses were performed using R-software version 3.4.1 (R Foundation for  
24 Statistical Computing; Vienna, Austria).  
25  
26  
27  
28  
29  
30  
31  
32  
33  
34  
35

### 36 **Patient and public involvement**

37  
38 No patients were involved in the study design and no patients were asked to consult on the  
39 outcomes or interpretation of the results. Results will be disseminated to relevant patient  
40 communities through news media and social media.  
41  
42  
43  
44

### 45 **RESULTS**

46  
47  
48 The study was based on a total of 19.6 million GP consultations for common infections.  
49 URTI was the most frequent common infection (CPRD: 9,646,774) followed by LRTI (CPRD:  
50 2,288,616) and UTI (CPRD: 1,511,176). A total of 884 GP practices were included in the  
51 analysis (CPRD: 546; SAIL: 338) (Table 1). The mean age of the practice population was 38  
52 years in CPRD and 30 years in SAIL. The majority of patients had no comorbidities recorded  
53 (Charlson score: 0). There were 25,721 cases of infection-related complications as recorded  
54  
55  
56  
57  
58  
59  
60

1  
2  
3 in primary care in CPRD and 15,192 cases in SAIL. The rate of these complications was 1.3  
4 and 4.1 per 1000 person-months respectively. For infection-related hospital admission, the  
5 number of cases was 17,810 in CPRD-HES and 19,796 in SAIL-HES, with rates of 1.4 and  
6  
7 5.1 per 1000 person-months, respectively (Table 2). The majority of antibiotics were  
8  
9 prescribed for LRTI, Sinusitis, and UTI (Table 3). Antibiotics were less likely to be prescribed  
10  
11 for Otitis Externa. There was considerable variability between general practices in the  
12  
13 percentages of patients prescribed an antibiotic. For URTI, 28.6% of the patients received an  
14  
15 antibiotic at the 5th percentile practice and 66.4% at the 95th percentile practice. Summary  
16  
17 counts of infection-related hospital admission types from CPRD-HES are available in  
18  
19 appendix 1, supplementary material.  
20  
21  
22  
23  
24

### 25 **Infection-related hospital admission**

26  
27 The incidence of infection-related hospital admission was found to be associated with the  
28  
29 practice-level antibiotic prescribing rate (Figure 1). A 10.4% higher antibiotic prescribing rate  
30  
31 (IQR) was associated with an IRR of 0.943 (0.920 to 0.967), denoting a 5.7% lower infection-  
32  
33 related hospital admission rate in the combined analysis. Results between CPRD-HES and  
34  
35 SAIL-HES were comparable. In CPRD-HES, a 10.1% higher antibiotic prescribing rate was  
36  
37 associated with an IRR of 0.959 (0.926 to 0.992), meaning a 4.1% lower hospital admission  
38  
39 rate. For SAIL-HES, this was 7.2% (IRR: 0.928; 0.895 to 0.961) lower with the IQR of 10.7%  
40  
41 higher antibiotic prescribing by GP practices.  
42  
43  
44

45 The observed association varied by infection. In the combined analysis, the largest  
46  
47 association was observed in LRTI (IRR: 0.839(16.1%); 0.803 to 0.876), UTI (IRR: 0.853  
48  
49 (0.788 to 0.924); 14.7%), and URTI (IRR: 0.935 (0.905 to 0.965); 6.5%) (Figure 2). In  
50  
51 patients with URTI, 14.9% (CPRD-HES) and 17.2% (SAIL-HES) higher antibiotic prescribing  
52  
53 was associated with infection-related hospital admissions being lower by 7.7% (0.923; 0.879  
54  
55 to 0.969) and 5.6% (0.944; 0.905 to 0.984). LRTI was associated with a 14.2% (CPRD-HES,  
56  
57 IRR: 0.858; 0.808 to 0.911) and 18.2% (SAIL-HES, IRR: 0.818; 0.767 to 0.872) lower  
58  
59 incidence for hospital admission when antibiotic prescribing was higher by 8.7% and 15.1%.  
60

1  
2  
3 In patients who consulted their GP for UTI, the incidence of hospital admission was 10.5%  
4 (IRR: 0.895 (0.783 to 1.027) lower with 7.6% higher antibiotic prescribing (CPRD-HES). In  
5 SAIL-HES, 12.0% higher antibiotic prescribing for UTI was associated with lower incidence  
6 by 16.8% (IRR: 0.832 (0.755 to 0.919)). Patients aged 18-39 years old had the largest  
7 association for hospital admission (CPRD-HES: 0.884 (0.823 to 0.949; IQR unit: 10.88))  
8 amongst the age categories (figure 3).  
9  
10  
11  
12  
13  
14

15  
16 The number needed to treat with antibiotics to prevent one patient from developing infection-  
17 related complications was calculated over the 30 day follow-up period. The number needed  
18 to treat for patients with URTI at risk of hospital admission was 1164. For patients with LRTI  
19 and UTI the number needed to treat was 417 and 484 respectively.  
20  
21  
22  
23  
24

### 25 **GP-recorded infection-related complications**

26  
27 Higher levels of antibiotic prescribing by GP practices were associated with lower incidence  
28 of infection-related complication as recorded by the GP. The incidence of GP-recorded  
29 infection-related complications reduced by 16.9% (0.831; 0.791 to 0.873) and 9.0% (0.910;  
30 0.866 to 0.954) with an increase in antibiotic prescribing of 10.4% and 10.6% for CPRD and  
31 SAIL respectively.  
32  
33  
34  
35  
36  
37

38  
39 Evaluating the observed association by common infection separately found that URTI was  
40 associated with lower GP-recorded infection-related complications by 20.4% (0.803; 0.758 to  
41 0.852) when antibiotic prescribing increased by 15.5% in CPRD. In SAIL, the observed  
42 reduction was 12.7% (0.873; 0.832 to 0.916) when antibiotic prescribing increased by  
43 17.2%.  
44  
45  
46  
47  
48  
49

50 Antibiotic prescribing for LRTI being higher by 9.1% and 15.1% was associated with the  
51 incidence of GP-recorded infection-related complications being lower by 16.2% (IRR: 0.838;  
52 0.786 to 0.895) and 5.5% (IRR: 0.945; 0.871 to 1.027) for CPRD and SAIL respectively. For  
53 UTI, the incidence of GP-recorded infection-related complications was similarly lowered  
54  
55  
56  
57  
58  
59  
60

1  
2  
3 across CPRD (15.6%; 0.844 (0.770 to 0.926) (IQR unit: 8.01)) and SAIL (8.7%; 0.913 (0.838  
4 to 0.997) (IQR unit: 11.95)).  
5  
6

7  
8 No effect modification by gender was observed in any of the datasets evaluated (Figure 3).  
9

10 The effect was more obvious in younger patients. Patients aged 0-17 had the largest  
11 association in GP-recorded infection-related complications in CPRD (22%; IRR: 0.780 (0.725  
12 to 0.839); IQR: 12.05). Patients aged 0-17 years and 40-59 showed similar associations for  
13 both datasets (Figure 3). Polynomials were fitted on a deciled antibiotic prescribing rate as a  
14 sensitivity analysis. First order polynomials best fitted the data and showed a downward  
15 linear trend from low to high prescribing (Supplementary material, appendix 2). An inverse  
16 association was found in an additional sensitivity analysis which paired URTI and LRTI with  
17 plausible subsequent infection-related complications, such as pneumonia and hospital  
18 admission for LRTI (Supplementary material, appendix 3. In patients who consulted their GP  
19 for LRTI, the incidence of a hospital admission with LRTI was 18% (0.820 (0.765 - 0.879))  
20 lower with 8.7% higher antibiotic prescribing (CPRD-HES).  
21  
22  
23  
24  
25  
26  
27  
28  
29  
30  
31  
32  
33

## 34 **DISCUSSION**

35  
36 This study found that higher levels of incident antibiotic prescribing by practices were  
37 associated with lower rates of hospital admission and GP diagnosed infection-related  
38 complications. Lower rate of poor clinical outcomes with higher levels of antibiotic  
39 prescribing was more pronounced for URTI, LRTI, and UTI but had no association with poor  
40 outcomes for otitis media and otitis externa. A higher level of incident antibiotic prescribing in  
41 younger patients was associated with better clinical outcomes while no association was  
42 observed in patients over 40 years old.  
43  
44  
45  
46  
47  
48  
49  
50

51 This is the first study to use two large primary care databases with linked hospitalisation data  
52 to evaluate the difference in hospital admission after common infections comparing high with  
53 low prescribing GP practices. The focus of this analysis was at practice level with the  
54 emphasis on evaluating governmental guidance on reducing overall prescribing. The study  
55  
56  
57  
58  
59  
60

1  
2  
3 population was restricted to new antibiotic prescribing in patients with newly developed  
4 common infections. Including patients with more complex clinical scenarios, like repeated  
5 antibiotic users, complicates the estimation of the effect of interest. Past consultations and  
6 potential treatment for a common infection may be associated with future consultations,  
7 treatment, and future outcomes of interest. This will lead to a problem when the outcome of  
8 interest cannot be related back to a single index visit and instead potentially to more than  
9 one visit. The results of this analysis can only be interpreted in the context of the incidental  
10 antibiotic user.  
11  
12  
13  
14  
15  
16  
17  
18  
19

20 This practice level analysis possibly simplifies the relationship between antibiotic prescribing  
21 rate and infection-related complications by aggregating data up to practice level and ignoring  
22 diversity in patient characteristics within a practice. Some potential confounding at practice  
23 level may occur due to variation in patient population frailty even when characteristics have  
24 been accounted for at practice level [19]. In addition, although this analysis attempted to  
25 adjust for several available factors which might influence the association investigated. There  
26 remains a potential for additional residual confounding by non-adjusted for covariates.  
27  
28  
29  
30  
31  
32  
33  
34  
35

36 Diagnoses are based on clinical coding both in primary and secondary care and potential  
37 misclassifications or misdiagnoses in the underlying data could have occurred. Differences  
38 in coding practices for common infections among English GP practices has been evaluated  
39 previously and found to be problematic at times [4]. As no data were available on infection  
40 severity or symptom scores, no conclusions can be drawn on the appropriateness of  
41 antibiotics prescribed. This analysis was based on digital patient charts without access to  
42 free-text due to GDPR rules as this poses a possible patient identification risk. Digital patient  
43 charts are automatically generated and transferred to the database. Individual patients were  
44 able to contribute multiple infection episodes, as long as the consultations were at least 6  
45 months apart.  
46  
47  
48  
49  
50  
51  
52  
53  
54  
55

56  
57 The incidence rates of the clinical outcomes were different between SAIL and CPRD, with  
58 higher rates in Wales. There has been a measles epidemic in Wales recently which may  
59  
60

1  
2  
3 partly explain these differences. However, this remains speculative. Infections are often  
4 localised and infection rates differ between locations. In addition, another possible  
5 explanation could be that this difference is due to coding behaviour. However, the level of  
6 data available does not allow in-depth investigation into this difference. The NNTs presented  
7 are related to the 30 day follow-up window. They may appear large and initial clinical  
8 relevance uncertain. UK guidance for initiating statin use states those with a 10-year risk of  
9 10-19% are eligible. Converting this 10-year risk to a 30 day estimated NNT gives a NNT of  
10 1139 (10%) and 569 (19%). These NNTs are similar to those presented in this analysis and  
11 have led to a change in clinical practice and prescribing behaviour.  
12  
13

14 Those with weaker immune systems, the very young and very old, have an elevated  
15 susceptibility to infections which may increase their antibiotic use and risk of related  
16 complications [20]. Analysis performed by age group showed that higher levels of antibiotic  
17 prescribing were associated with reduced infection-related complications in younger  
18 patients. Higher levels of antibiotic prescribing were not associated with lower rates of  
19 infection-related complications in patients aged 60+ years. A possible hypothesis for this is  
20 that increased lifetime exposure and repeatedly using antibiotics could lower their  
21 effectiveness in reducing a patient's risk of complications. Recent research reported reduced  
22 effectiveness of antibiotics with repeated use over several years [21]. A literature review by  
23 Costelloe *et al.* (2010) found that individuals who were prescribed an antibiotic for respiratory  
24 or urinary tract infections develop bacterial resistance that was detectable for up to 12  
25 months [9]. Similar association has been reported recently for resistant blood stream  
26 infection after UTI prescribing [22]. However, further research is needed to assess any age  
27 effect in the effectiveness of antibiotics. Another reason may be that GPs may be more  
28 hesitant to withhold antibiotics from older patients to avoid under-treatment, leading to  
29 seeing a greater response in younger patients at higher prescribing rates.  
30  
31

32 The more antibiotics prescribed, the higher the GP re-attendance rates for common  
33 infections and subsequently the larger the re-prescribing antibiotic rate becomes [23]. A  
34  
35  
36  
37  
38  
39  
40  
41  
42  
43  
44  
45  
46  
47  
48  
49  
50  
51  
52  
53  
54  
55  
56  
57  
58  
59  
60

1  
2  
3 randomised trial involving 34 general practices following the STAR educational programme  
4 saw reductions in overall levels of antibiotic prescribing in the intervention group [24].  
5  
6 Hospital admission for respiratory tract infections and complications increased by 1.9% in  
7  
8 the intervention group, suggesting that reduced antibiotic prescribing may increase hospital  
9  
10 admission. However, this result was not found to be statistically different and had limited  
11  
12 statistical power.  
13  
14

15  
16 UK initiatives have included the TARGET toolkit and the Quality Premium (QP) to reduce  
17  
18 overall levels of antibiotic use [24–26]. The QP was introduced in April 2015 and provided a  
19  
20 financial incentive to Clinical Commissioning Groups (CCGs) to reduce antibiotic prescribing  
21  
22 rates. A significant 3% reduction in antibiotic prescribing rate was observed after this  
23  
24 initiative was introduced, with greatest reduction in children [27]. Reducing antibiotic  
25  
26 prescribing rates may be good for antibiotic resistance, but as shown here could potentially  
27  
28 cause more infection-related complications. Antibiotic prescribing requires a careful balance;  
29  
30 with each prescription to treat and reduce the risk of infection-related complications, the  
31  
32 chance of developing resistant infections increases for individual patients and drives AMR  
33  
34 risk for the wider community. With the current aim to reduce antibiotic prescribing in the  
35  
36 community in the UK by 25% from the 2013 baseline, particular focus is required to  
37  
38 understand individual patient risk, reducing inappropriate prescribing and monitor infection  
39  
40 related complications. For patients with LRTI in primary care, Moore *et al.* [28] modelled a  
41  
42 predictive value of the risk of patients developing serious outcomes including hospital  
43  
44 admission. Such a direct approach, together with delayed prescribing strategies [29] are  
45  
46 suggested to target prescribing to those most likely to develop complications and reduce  
47  
48 overall prescribing.  
49  
50  
51

52  
53 A Cochrane review of 27 trials on antibiotics for sore throat found that antibiotics prevented  
54  
55 complications (acute rheumatic fever, glomerulonephritis, otitis media, and sinusitis) in  
56  
57 patients, but the rate of complications were so low the benefit of antibiotic prescribing may  
58  
59 not always be clear [30]. Similarly another Cochrane review focused on antibiotics for acute  
60



1  
2  
3 otitis media in children found that serious complications, such as mastoiditis and meningitis,  
4 were rare [31]. Both reviews highlighted the inability to predict which patients are at risk of  
5 developing complications. Clinical tools such as the FeverPAIN score and Centor criteria are  
6 used to guide antibiotic treatment for acute sore throat. However, Little *et al.* (2013)  
7 concluded that clinical scores such as FeverPAIN were of limited value in predicting clinical  
8 complications [32].  
9  
10  
11  
12  
13  
14  
15

16 In conclusion, lower levels of practice level antibiotic prescribing were associated with higher  
17 levels of infection-related complications and hospital admissions. Identifying and developing  
18 accurate clinical tools for predicting which patients are at risk of complications requires much  
19 needed further research. To improve patient outcomes and reduce the risk of avoidable  
20 complications, there is a need to target patients most likely to benefit from effective, safe  
21 prescribing, based on shared decision making.  
22  
23  
24  
25  
26  
27  
28  
29  
30  
31  
32  
33  
34  
35  
36  
37  
38  
39  
40  
41  
42  
43  
44  
45  
46  
47  
48  
49  
50  
51  
52  
53  
54  
55  
56  
57  
58  
59  
60

## NOTES

**Funding:** This work was supported by Connected Health Cities (grant number: n/a) which is a Northern Health Science Alliance led programme funded by the Department of Health and Social Care and delivered by a consortium of academic and National Health Service organisations across the north of England.

**Conflict of interest:** All authors have completed the ICMJE uniform disclosure form and declare: BvB, VP, CM, DA, TvS report grants from the Department of Health and Social Care for the submitted work; no financial relationships with any organisations that might have an interest in the submitted work in the previous three years; no other relationships or activities that could appear to have influenced the submitted work.

**Ethical approval:** This study is partly based on data from the Clinical Practice Research Datalink obtained under licence from the UK Medicines and Healthcare products Regulatory Agency (MHRA). HES data is subject to Crown copyright (2018) protection, re-used with the permission of The Health, & Social Care Information Centre, all rights reserved. The data is provided by patients and collected by the NHS as part of their care and support. This study also used anonymised data held in the Secure Anonymised Information Linkage (SAIL) System, which is part of the national e-health records infrastructure for Wales. The interpretation and conclusions contained in this study are those of the authors alone, and not necessarily those of the SAIL, MHRA, NHTA, NHS or the Department of Health.

The study protocol was approved by the Independent Scientific Advisory Committee for CPRD research [protocol number 16\_153] and SAIL's Information Governance Protocol Review Panel [protocol number 0693]. We would like to acknowledge all the data providers who make anonymised data available for research.

**Data sharing:** Read codes used are published on Clinicalcodes.org. Electronic health records are, by definition, considered sensitive data in the UK by the Data Protection Act and cannot be shared via public deposition because of information governance restriction in

1  
2  
3 place to protect patient confidentiality. Access to data is available only once approval has  
4 been obtained through the individual constituent entities controlling access to the data.  
5 CPRD data can be requested via application to the Clinical Practice Research Datalink  
6 (www.cprd.com), and SAIL data are available by application to the Secure Anonymised  
7 Information Linkage Databank (<https://saildatabank.com/>).  
8  
9  
10  
11  
12

13  
14 **Author contributor statement:** BvB and TvS contributed to the idea and design of the  
15 study. TvS extracted the relevant data from the databases. BvB analysed and interpreted the  
16 data with feedback from TvS and MS. BvB drafted the initial paper. VP, CM, MS, AW, WW,  
17 and DA contributed to drafts and critical revision for intellectual content. All authors approved  
18 the final manuscript.  
19  
20  
21  
22  
23  
24

25 **Patient and public involvement:** No patients were involved in the study design and no  
26 patients were asked to consult on the outcomes or interpretation of the results. Results will  
27 be disseminated to relevant patient communities through news media and social media.  
28  
29  
30  
31  
32  
33  
34  
35  
36  
37  
38  
39  
40  
41  
42  
43  
44  
45  
46  
47  
48  
49  
50  
51  
52  
53  
54  
55  
56  
57  
58  
59  
60

## REFERENCES

1. National Institute for Health and Care Excellence (NICE), NHS, Centre for Clinical Practice at NICE. Respiratory tract infections (self-limiting): prescribing antibiotics. 2008. Available at: <https://www.nice.org.uk/guidance/cg69/chapter/1-guidance>.
2. Pouwels KB, Dolk FCK, Smith DRM, Robotham J V., Smieszek T. Actual versus 'ideal' antibiotic prescribing for common conditions in English primary care. *Journal of Antimicrobial Chemotherapy* **2018**; 73:ii19–ii26.
3. Public Health England. English surveillance programme for antimicrobial utilisation and resistance (ESPAUR) Report 2018. 2018. Available at: <https://www.gov.uk/government/publications/english-surveillance-programme-antimicrobial-utilisation-and-resistance-espaur-report>.
4. Smieszek T, Pouwels KB, Dolk FCK, et al. Potential for reducing inappropriate antibiotic prescribing in English primary care. *Journal of Antimicrobial Chemotherapy* **2018**; 73:ii36–ii43.
5. Department of Health and Social Care. UK 5-year action plan for antimicrobial resistance 2019 to 2024. 2019. Available at: [https://assets.publishing.service.gov.uk/government/uploads/system/uploads/attachment\\_data/file/784894/UK\\_AMR\\_5\\_year\\_national\\_action\\_plan.pdf](https://assets.publishing.service.gov.uk/government/uploads/system/uploads/attachment_data/file/784894/UK_AMR_5_year_national_action_plan.pdf).
6. Petersen I, Johnson AM, Islam A, Duckworth G, Livermore DM, Hayward AC. Protective effect of antibiotics against serious complications of common respiratory tract infections: retrospective cohort study with the UK General Practice Research Database. *BMJ (Clinical research ed)* **2007**; 335:982.
7. Gulliford MC, Gulliford MC, Moore M V, et al. Safety of reduced antibiotic prescribing for self limiting respiratory tract infections in primary care: cohort study using electronic health records. *The BMJ* **2016**; 354:354:1–10.
8. Gharbi M, Drysdale JH, Lishman H, et al. Antibiotic management of urinary tract infection in elderly patients in primary care and its association with bloodstream infections and all cause mortality: population based cohort study. *BMJ* **2019**; 364:l525.
9. Costelloe C, Metcalfe C, Lovering A, Mant D, Hay AD. Effect of antibiotic prescribing in primary care on antimicrobial resistance in individual patients: Systematic review and meta-analysis. *BMJ (Online)* **2010**; 340:c2096.
10. Herrett E, Gallagher AM, Bhaskaran K, et al. Data Resource Profile: Clinical Practice Research Datalink (CPRD). *Int J Epidemiol* **2015**; 44:827–836.
11. Jones KH, Ford DV, Lyons RA. The SAIL Databank: 10 years of spearheading data privacy and research utility, 2007-2017. Swansea University Medical School, Ysgol Feddygaeth Prifysgol Abertawe **2017**; :15.
12. University of Manchester, Institute of Population Health. ClinicalCodes Repository. Available at: <https://clinicalcodes.rss.mhs.man.ac.uk/>. Accessed 6 February 2020.
13. Government M of H Communities & Local. English indices of multiple deprivation 2015: technical report. 2015. Available at: <https://www.gov.uk/government/publications/english-indices-of-deprivation-2015-technical-report>. Accessed 6 February 2020.

14. Charlson ME, Pompei P, Ales KL, MacKenzie CR. A new method of classifying prognostic comorbidity in longitudinal studies: Development and validation. *Journal of Chronic Diseases* **1987**; 40:373–383.
15. Babyak MA. Rescaling continuous predictors in regression models. *Statistical Tips from the Editors of Psychosomatic Medicine*. 2009; Available at: <http://stattips.blogspot.com/2009/08/rescaling-continuous-predictors-in.html>. Accessed 6 February 2020.
16. Gordon M, Lumley T. Advanced Forest Plot Using 'grid' Graphics. 2017. Available at: <https://cran.r-project.org/web/packages/forestplot/forestplot.pdf>.
17. Wickham H, François R, Henry L, Müller K. A Grammar of Data Manipulation; Package 'dplyr'. 2019. Available at: <https://cran.r-project.org/web/packages/dplyr/dplyr.pdf>.
18. Ripley B, Venables B, Bates DM, Hornik K, Gebhardt A, Firth D. Support Functions and Datasets for Venables and Ripley's MASS. 2019. Available at: <https://cran.r-project.org/web/packages/MASS/MASS.pdf>.
19. Hope EC, Crump RE, Hollingsworth TD, Smieszek T, Robotham J V., Pouwels KB. Identifying English Practices that Are High Antibiotic Prescribers Accounting for Comorbidities and Other Legitimate Medical Reasons for Variation. *EClinicalMedicine* **2018**;
20. Yoshikawa TT. Epidemiology and Unique Aspects of Aging and Infectious Diseases. *Clin Infect Dis* **2000**; 30:931–933.
21. van Staa TP, Palin V, Li Y, et al. The effectiveness of frequent antibiotic use in reducing the risk of infection-related hospital admissions: results from two large population-based cohorts. *BMC Medicine* **2020**; 18:40.
22. Lishman H, Costelloe C, Hopkins S, et al. Exploring the relationship between primary care antibiotic prescribing for urinary tract infections, *Escherichia coli* bacteraemia incidence and antimicrobial resistance: an ecological study. *International Journal of Antimicrobial Agents* **2018**; 52:790–798.
23. Little P, Gould C, Williamson I, Warner G, Gantley M, Kinmonth AL. Reattendance and complications in a randomised trial of prescribing strategies for sore throat: the medicalising effect of prescribing antibiotics. *BMJ* **1997**; 315:350.
24. Butler CC, Simpson SA, Dunstan F, et al. Effectiveness of multifaceted educational programme to reduce antibiotic dispensing in primary care: practice based randomised controlled trial. *BMJ* **2012**; 344:d8173.
25. Royal College of General Practitioners. TARGET antibiotics: Treat Antibiotics Responsibly, Guidance, Education, Tools. 2013. Available at: <http://www.rcgp.org.uk/clinical-and-research/toolkits/target-antibiotic-toolkit.aspx>. Accessed 14 May 2018.
26. NHS England. Quality Premium: Guidance for 2017-19. 2018: 1–32. Available at: <https://www.england.nhs.uk/ccg-out-tool/qual-prem/>. Accessed 14 May 2019.
27. Bou-Antoun S, Costelloe C, Honeyford K, et al. Age-related decline in antibiotic prescribing for uncomplicated respiratory tract infections in primary care in England following the introduction of a national financial incentive (the Quality Premium) for

1  
2  
3 health commissioners to reduce use of antibiotic. *Journal of Antimicrobial*  
4 *Chemotherapy* **2018**; 73:2883–2892.  
5

- 6 28. Moore M, Stuart B, Lown M, et al. Predictors of adverse outcomes in uncomplicated  
7 lower respiratory tract infections. *Annals of Family Medicine* **2019**;  
8  
9 29. Little P, Stuart B, Hobbs FDR, et al. Antibiotic prescription strategies for acute sore  
10 throat: A prospective observational cohort study. *The Lancet Infectious Diseases* **2014**;  
11  
12 30. Del Mar CB, Glasziou PP. Antibiotics for sore throats? *Journal of Paediatrics and Child*  
13 *Health* **1998**; 34:498–499.  
14  
15 31. Venekamp RP, Sanders SL, Glasziou PP, Del Mar CB, Rovers MM. Antibiotics for  
16 acute otitis media in children. *Cochrane Database of Systematic Reviews* **2015**;  
17  
18 32. Little P, Stuart B, Richard Hobbs FD, et al. Predictors of suppurative complications for  
19 acute sore throat in primary care: Prospective clinical cohort study. *BMJ (Online)* **2013**;  
20 347:f6867.  
21  
22  
23  
24  
25  
26  
27  
28  
29  
30  
31  
32  
33  
34  
35  
36  
37  
38  
39  
40  
41  
42  
43  
44  
45  
46  
47  
48  
49  
50  
51  
52  
53  
54  
55  
56  
57  
58  
59  
60

## TABLES

**Table 1. Demographic and characteristics of the GP practices included in CPRD, CPRD-HES, and SAIL datasets. The CPRD dataset covers England, Scotland, and Northern Island. CPRD-HES covers England only. SAIL databank covers Wales only.**

|                                                          | CPRD<br>n= 546 | CPRD-HES linked<br>n= 346 | SAIL<br>n= 338 |
|----------------------------------------------------------|----------------|---------------------------|----------------|
| Consultations                                            |                |                           |                |
| Upper Respiratory Tract Infection (URTI)                 | 9,646,774      | 5,698,611                 | 1,956,752      |
| Lower Respiratory Tract Infection (LRTI)                 | 2,288,616      | 1,321,593                 | 435,929        |
| Otitis Externa                                           | 1,166,023      | 708,465                   | 183,843        |
| Otitis Media                                             | 864,791        | 529,946                   | 215,495        |
| Sinusitis                                                | 707,736        | 422,638                   | 97,636         |
| Urinary Tract Infection (UTI)                            | 1,511,176      | 881,957                   | 263,921        |
| Age (mean, sd)                                           | 38.50 (3.86)   | 38.47 (3.72)              | 30.17 (7.11)   |
| Sex female (%)                                           | 58.98          | 59.06                     | 56.25          |
| Charlson comorbidity index (CCI) (mean (%))              |                |                           |                |
| None (0)                                                 | 65.80          | 66.16                     | 77.28          |
| Low (1-2)                                                | 27.41          | 27.24                     | 18.39          |
| Medium (3-4)                                             | 5.10           | 4.97                      | 3.24           |
| High (5-6)                                               | 1.25           | 1.19                      | 0.81           |
| Very high (>7)                                           | 0.45           | 0.44                      | 0.28           |
| Region (count, %)                                        |                |                           |                |
| North England                                            | 109 (20.0%)    | 83 (24.0%)                | -              |
| Midlands                                                 | 120 (22.0%)    | 87 (25.1%)                | -              |
| South England                                            | 158 (28.9%)    | 124 (35.8%)               | -              |
| London                                                   | 67 (12.3%)     | 52 (15.0%)                | -              |
| Devolved Administrations (Northern Ireland and Scotland) | 92 (16.8%)     | -                         | -              |
| Wales                                                    | -              | -                         | 338 (100%)     |
| Socioeconomic status (mean (%))                          |                |                           |                |
| 1 least deprived                                         | 13.29          | 20.98                     | 23.77          |
| 2                                                        | 14.25          | 22.49                     | 21.36          |
| 3                                                        | 12.49          | 19.71                     | 21.17          |
| 4                                                        | 12.47          | 19.68                     | 17.65          |
| 5 most deprived                                          | 10.17          | 16.05                     | 16.05          |
| Missing data                                             | 37.32          | 1.09                      | -              |
| Hospitalisation in previous year (mean (%))              | 0.02           | 0.02                      | 0.03           |
| GPs per 1000 consults (mean, sd)                         | 3.54 (2.30)    | 3.52 (2.25)               | NA             |

Footnote table 1. GP count per 1000 consults was not available in SAIL databank.



**Table 2. Rates of infection-related complications and or hospital admission in the 30 days after GP visit for common infection. Hospital admission was identified from the linked HES data. GP-recorded infection-related complications were identified from the electronic health records, which included any revisit to the GP for complications after the initial consultation.**

| Infection-related complications            | Number of cases (30 day follow-up) | Sum person-months (30 day follow-up) | Rate and 95% CI (per 1000 person-month) |
|--------------------------------------------|------------------------------------|--------------------------------------|-----------------------------------------|
| Infection-related complication GP-recorded |                                    |                                      |                                         |
| CPRD                                       | 25,721                             | 19,220,606                           | 1.34 (1.32 - 1.35)                      |
| SAIL                                       | 15,192                             | 3,718,739                            | 4.09 (4.02 - 4.15)                      |
| Hospital admission                         |                                    |                                      |                                         |
| CPRD-HES linked                            | 17,810                             | 12,335,982                           | 1.44 (1.42 - 1.47)                      |
| SAIL-HES                                   | 19,796                             | 3,900,897                            | 5.08 (5.00 - 5.15)                      |

**Table 2. Antibiotic prescribing rates for each common infection across practices included in CPRD (n=546), CPRD-HES (n=346), and SAIL (n= 338). Rates are presented for six common infections. Proportion of consultations with antibiotics prescribed is presented with the mean percentage and the 5<sup>th</sup> through 95<sup>th</sup> percentile at practice level. The mean percentage of antibiotic prescribed in CPRD after a consultation for URTI was 46.1%.**

|                                                                                     | Mean % (sd)   | 5 %   | 25 %  | 50 %  | 75 %  | 95 %  |
|-------------------------------------------------------------------------------------|---------------|-------|-------|-------|-------|-------|
| Upper Respiratory Tract Infection (URTI);<br>URTI, cough or cold, sore throat       |               |       |       |       |       |       |
| CPRD                                                                                | 46.14 (11.71) | 28.59 | 38.25 | 45.14 | 53.73 | 66.36 |
| CPRD-HES linked                                                                     | 43.74 (10.97) | 28.88 | 38.17 | 45.15 | 53.09 | 63.97 |
| SAIL                                                                                | 43.37 (12.07) | 24.83 | 34.57 | 42.88 | 51.76 | 63.43 |
| Lower Respiratory Tract Infection (LRTI);<br>Excluding community acquired pneumonia |               |       |       |       |       |       |
| CPRD                                                                                | 84.79 (8.89)  | 69.79 | 81.45 | 86.68 | 90.52 | 94.40 |
| CPRD-HES linked                                                                     | 85.24 (8.03)  | 70.89 | 81.90 | 86.80 | 90.57 | 94.68 |
| SAIL                                                                                | 78.11 (11.66) | 55.47 | 71.56 | 80.45 | 86.69 | 93.17 |
| Otitis Externa                                                                      |               |       |       |       |       |       |
| CPRD                                                                                | 26.33 (8.98)  | 15.34 | 20.00 | 24.55 | 31.00 | 42.70 |
| CPRD-HES linked                                                                     | 26.52 (8.44)  | 15.34 | 20.13 | 25.16 | 31.37 | 41.57 |
| SAIL                                                                                | 29.57 (10.65) | 14.92 | 22.03 | 28.71 | 34.89 | 48.5  |
| Otitis Media                                                                        |               |       |       |       |       |       |
| CPRD                                                                                | 78.10 (10.86) | 58.35 | 73.05 | 80.27 | 86.09 | 91.57 |
| CPRD-HES linked                                                                     | 78.27 (9.83)  | 59.20 | 73.35 | 79.51 | 85.81 | 91.30 |
| SAIL                                                                                | 78.49 (11.81) | 54.91 | 72.64 | 80.57 | 87.49 | 92.65 |
| Sinusitis                                                                           |               |       |       |       |       |       |
| CPRD                                                                                | 84.97 (8.93)  | 67.89 | 82.48 | 87.13 | 90.29 | 94.43 |
| CPRD-HES linked                                                                     | 85.75 (7.88)  | 70.07 | 83.20 | 87.60 | 90.63 | 94.57 |
| SAIL                                                                                | 82.12 (9.91)  | 63.36 | 77.44 | 84.22 | 88.89 | 94.73 |
| Urinary Tract Infection (UTI)                                                       |               |       |       |       |       |       |
| CPRD                                                                                | 85.90 (7.39)  | 74.01 | 82.96 | 87.28 | 90.98 | 93.72 |
| CPRD-HES linked                                                                     | 86.06 (6.40)  | 74.08 | 83.19 | 87.01 | 90.79 | 93.30 |
| SAIL                                                                                | 81.50 (10.30) | 61.46 | 76.70 | 84.66 | 88.65 | 93.18 |

## Figures

Figure 1. Incidence rate ratios (IRR) and 95% confidence interval (CI) of GP-recorded infection-related complications and hospital admissions comparing antibiotic prescribing at 75th to 25th percentile (IQR). Results are presented by data source. CPRD and SAIL effect estimates were combined using a fixed-effect meta-analysis method.

Figure 2. Effect estimates (IRRs and 95% CI) of GP-recorded infection-related complications and hospital admissions. Analyses compared antibiotic prescribing at 75th and 25th percentile (IQR) by 6 common infections. The IRR for hospital admission after a consultation for URTI in CPRD-HES was 0.923. This means for a 14.9% increase in antibiotic prescribing the rate of hospital admission is reduced by 7.7%.

Figure 3. Association of GP-recorded infection-related complications and hospital admissions comparing practice antibiotic prescribing at 75th and 25th percentile (IQR) by gender and age groups. Weights are from fixed-effects analysis.

1  
2  
3  
4  
5  
6  
7  
8  
9  
10  
11  
12  
13  
14  
15  
16  
17  
18  
19  
20  
21  
22  
23  
24  
25  
26  
27  
28  
29  
30  
31  
32  
33  
34  
35  
36  
37  
38  
39  
40  
41  
42  
43  
44  
45  
46  
47  
48  
49  
50  
51  
52  
53  
54  
55  
56  
57  
58  
59  
60

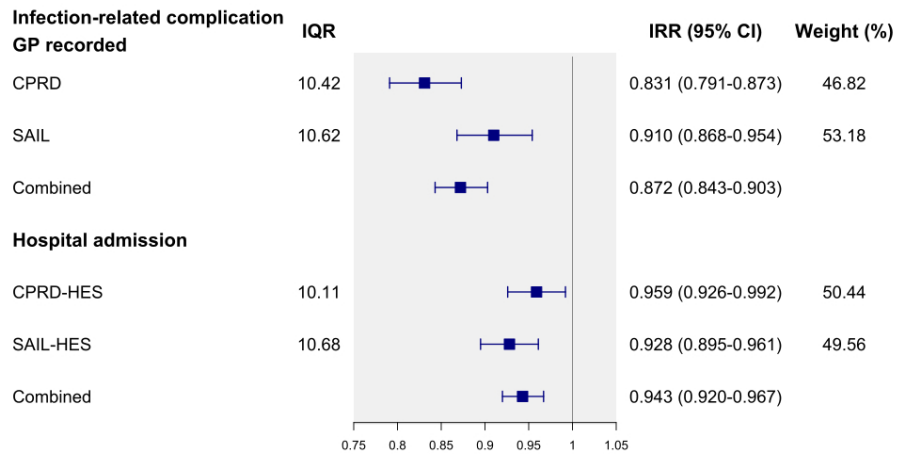

Incidence rate ratios (IRR) and 95% confidence interval (CI) of GP-recorded infection-related complications and hospital admissions comparing antibiotic prescribing at 75th to 25th percentile (IQR). Results are presented by data source. CPRD and SAIL effect estimates were combined using a fixed-effect meta-analysis method.

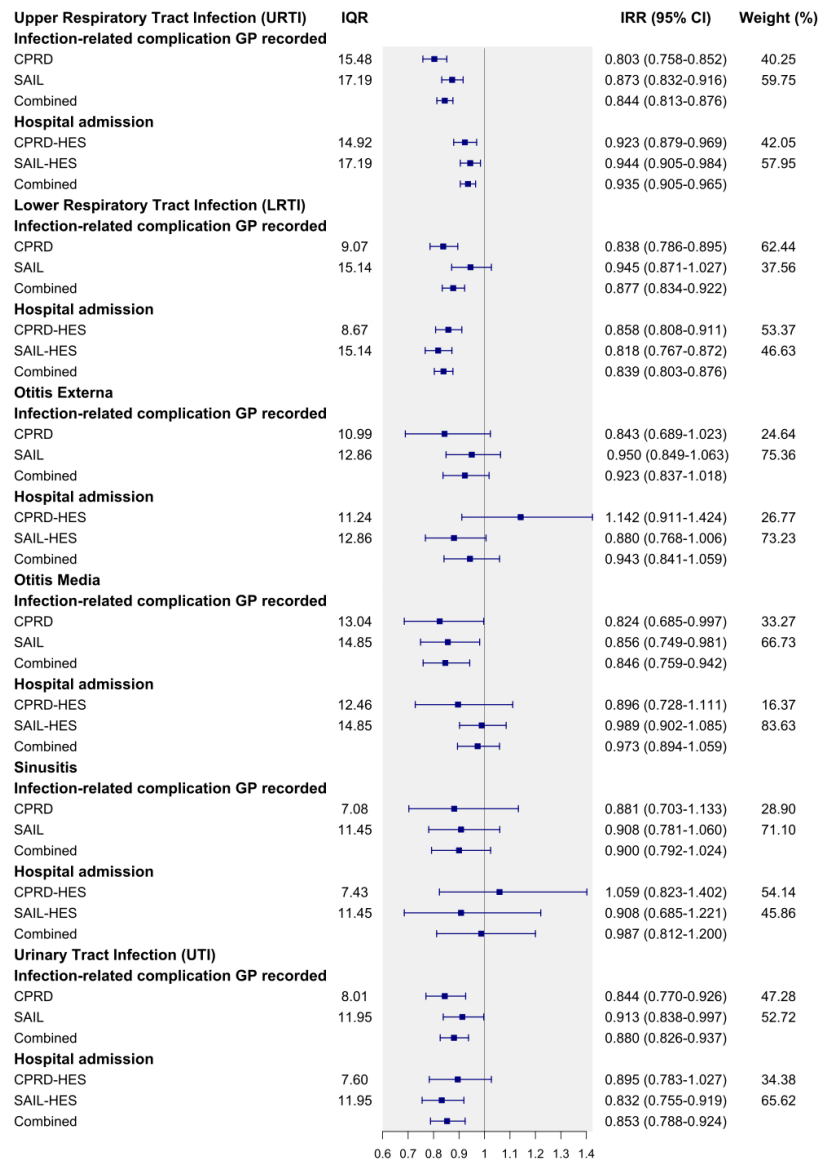

Effect estimates (IRRs and 95% CI) of GP-recorded infection-related complications and hospital admissions. Analyses compared antibiotic prescribing at 75th and 25th percentile (IQR) by 6 common infections. The IRR for hospital admission after a consultation for URTI in CPRD-HES was 0.923. This means for an 14.9% increase in antibiotic prescribing the rate of hospital admission is reduced by 7.7%.

1  
2  
3  
4  
5  
6  
7  
8  
9  
10  
11  
12  
13  
14  
15  
16  
17  
18  
19  
20  
21  
22  
23  
24  
25  
26  
27  
28  
29  
30  
31  
32  
33  
34  
35  
36  
37  
38  
39  
40  
41  
42  
43  
44  
45  
46  
47  
48  
49  
50  
51  
52  
53  
54  
55  
56  
57  
58  
59  
60

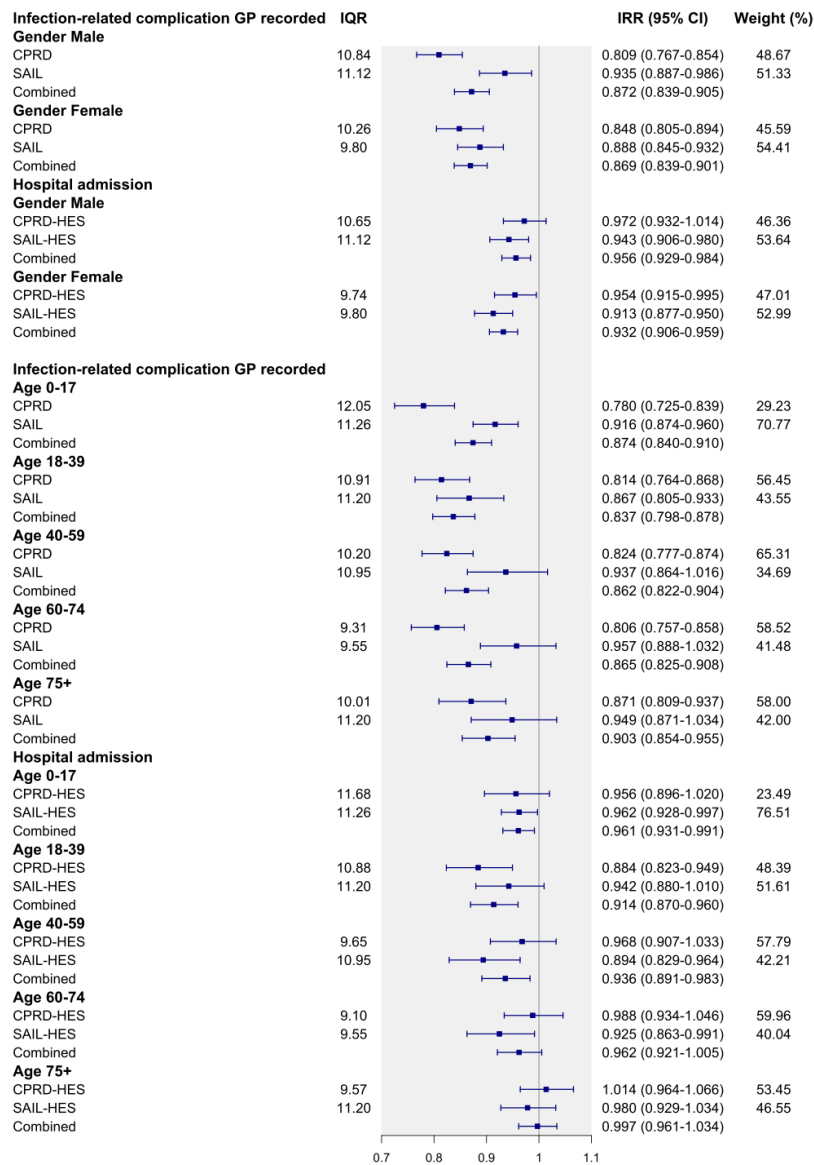

Association of GP-recorded infection-related complications and hospital admissions comparing practice antibiotic prescribing at 75th and 25th percentile (IQR) by gender and age groups. Weights are from fixed-effects analysis.

## Supplementary Material

### Appendix 1. Summary counts of infection-related hospital admission types as recorded as hospital admission codes in the primary care records.

**Table S1. Summary counts of distribution of infection-related complications based on hospital admission codes in CPRD-HES. Table shows counts from CPRD-HES by sex and age for multiple infection-related complications.**

| CPRD-HES                                         | All   | Male  | Female | Age 0-17 | Age 18-39 | Age 40-59 | Age 60-74 | Age 75+ |
|--------------------------------------------------|-------|-------|--------|----------|-----------|-----------|-----------|---------|
| Cough/Cold                                       | 103   | 60    | 43     | 96       | <5        | <5        | <5        | <5      |
| LRTI/Pneumonia                                   | 13543 | 6026  | 7527   | 2515     | 877       | 1681      | 2418      | 6056    |
| Otitis externa                                   | 67    | 29    | 38     | 12       | 18        | 16        | 10        | 10      |
| Otitis media                                     | 432   | 223   | 209    | 236      | 64        | 64        | 47        | 18      |
| Sinusitis                                        | 46    | 16    | 31     | 7        | 7         | 15        | 14        | <5      |
| Sore Throat                                      | 2000  | 1066  | 932    | 481      | 1085      | 357       | 58        | 17      |
| URTI                                             | 695   | 375   | 319    | 509      | 47        | 42        | 36        | 62      |
| UTI                                              | 112   | 39    | 73     | <5       | 36        | 12        | 27        | 38      |
| Sepsis                                           | 397   | 183   | 214    | 16       | 16        | 31        | 85        | 249     |
| Meningitis                                       | 45    | 18    | 27     | 13       | 11        | 10        | 5         | 6       |
| Infection-related complication, protocol defined | 17810 | 8234  | 9580   | 3673     | 2226      | 2464      | 2890      | 6562    |
| Any hospitalisation, not infection specific      | 77704 | 34050 | 43695  | 8196     | 7865      | 11990     | 18640     | 31030   |

Note 1: the sum of specific infections does not add up to sum of infection-related complications protocol defined due to a subset of patients having multiple infection-related complication admission codes. Note 2: the sum of Male and Female, and the sum of the age categories may not add up to the sum of 'All' due to some missingness in gender or year-of-birth registration in the patient's medical records.

## Appendix 2. Sensitivity analysis of continuous antibiotic prescribing rate

A sensitivity analysis was performed to determine if treating the antibiotic prescribing rate continuously is justified. The rate of infection-related hospital admission and antibiotic prescribing rate was modelled with negative binomial regression. The antibiotic prescribing rate was decile ranked to create 10 equally sized subsections. These deciles were modelled in the exact same way as the main analyses presented in this paper. First, second, and third degree polynomials were fitted on the deciled antibiotic rate and evaluated against the IRRs for infection-related complication as recorded by the GP ('A', 'B', 'C') and for infection-related hospital admission ('D', 'E', 'F'). For both outcomes the first order polynomials were the preferred models. Figure S1 Plot A shows a strong linear trend for between low prescribing at deciles 1 to 3 and high prescribing at deciles 8 to 10. Although the error bars of each point estimate overlap a downward linear trend is observable. Creating categories of the antibiotic prescribing rate may hide significant variability within each specific category. Treating the antibiotic prescribing rate continuously ensures that each GP practice is analysed separately against the outcomes of interest.

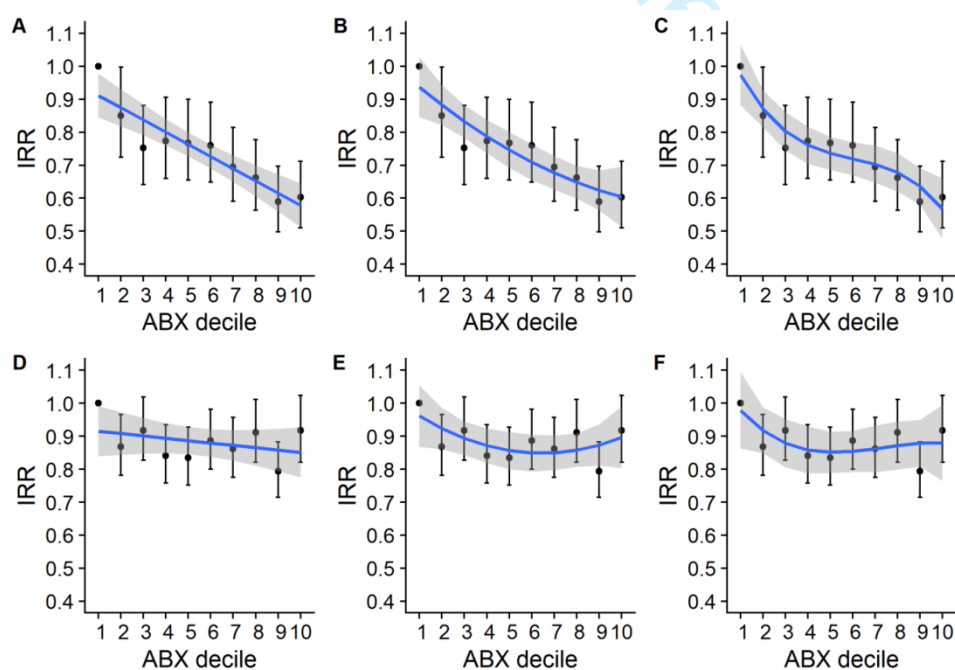

Figure s1. First (left), second (middle), and third (right) degree polynomials fitted on the deciled antibiotic prescribing rate. Plot A, B, and C model outcome infection-related complication as recorded by the GP. Plot D, E, and F model outcome infection-related hospital admission.



### Appendix 3. Sensitivity analysis of paired infection-related complication with common infection

A sensitivity analysis was performed where antibiotic prescribing for URTI and for LRTI was linked with three adverse outcomes: 1) Pneumonia GP diagnosed (CPRD), 2) LRTI hospital admission (CPRD-HES), and 3) Pneumonia hospital admission (CPRD-HES).

**Table S2. Adjusted IRRs from paired analysis of infection-related complications after a common infection with URTI or LRTI.**

| Common infection / infection-related complication | Adjusted IRR (95% CI) | IQR   |
|---------------------------------------------------|-----------------------|-------|
| URTI / Pneumonia (CPRD)                           | 0.801 (0.743 - 0.864) | 15.48 |
| URTI / LRTI (CPRD-HES)                            | 0.928 (0.868 - 0.992) | 14.92 |
| URTI / Pneumonia (CPRD-HES)                       | 0.888 (0.805 - 0.978) | 14.92 |
| LRTI / Pneumonia (CPRD)                           | 0.842 (0.787 - 0.902) | 9.07  |
| LRTI / LRTI (CPRD-HES)                            | 0.820 (0.765 - 0.879) | 8.67  |
| LRTI / Pneumonia (CPRD-HES)                       | 0.917 (0.834 - 1.011) | 8.67  |

**STROBE 2007 (v4) Statement—Checklist of items that should be included in reports of *cohort studies***

| Section/Topic                | Item # | Recommendation                                                                                                                                                                       | Reported on page # |
|------------------------------|--------|--------------------------------------------------------------------------------------------------------------------------------------------------------------------------------------|--------------------|
| <b>Title and abstract</b>    | 1      | (a) Indicate the study's design with a commonly used term in the title or the abstract                                                                                               | 1                  |
|                              |        | (b) Provide in the abstract an informative and balanced summary of what was done and what was found                                                                                  | 2                  |
| <b>Introduction</b>          |        |                                                                                                                                                                                      |                    |
| Background/rationale         | 2      | Explain the scientific background and rationale for the investigation being reported                                                                                                 | 3                  |
| Objectives                   | 3      | State specific objectives, including any prespecified hypotheses                                                                                                                     | 4                  |
| <b>Methods</b>               |        |                                                                                                                                                                                      |                    |
| Study design                 | 4      | Present key elements of study design early in the paper                                                                                                                              | 5                  |
| Setting                      | 5      | Describe the setting, locations, and relevant dates, including periods of recruitment, exposure, follow-up, and data collection                                                      | 5-7                |
| Participants                 | 6      | (a) Give the eligibility criteria, and the sources and methods of selection of participants. Describe methods of follow-up                                                           | 5-6                |
|                              |        | (b) For matched studies, give matching criteria and number of exposed and unexposed                                                                                                  | -                  |
| Variables                    | 7      | Clearly define all outcomes, exposures, predictors, potential confounders, and effect modifiers. Give diagnostic criteria, if applicable                                             | 5-7                |
| Data sources/<br>measurement | 8*     | For each variable of interest, give sources of data and details of methods of assessment (measurement). Describe comparability of assessment methods if there is more than one group | 5                  |
| Bias                         | 9      | Describe any efforts to address potential sources of bias                                                                                                                            | 7                  |
| Study size                   | 10     | Explain how the study size was arrived at                                                                                                                                            | -                  |
| Quantitative variables       | 11     | Explain how quantitative variables were handled in the analyses. If applicable, describe which groupings were chosen and why                                                         | -                  |
| Statistical methods          | 12     | (a) Describe all statistical methods, including those used to control for confounding                                                                                                | 7-8                |
|                              |        | (b) Describe any methods used to examine subgroups and interactions                                                                                                                  | 8                  |
|                              |        | (c) Explain how missing data were addressed                                                                                                                                          | 7                  |
|                              |        | (d) If applicable, explain how loss to follow-up was addressed                                                                                                                       | -                  |
|                              |        | (e) Describe any sensitivity analyses                                                                                                                                                | 8                  |
| <b>Results</b>               |        |                                                                                                                                                                                      |                    |

|                          |     |                                                                                                                                                                                                                                                                                                                                                                                                               |                                           |
|--------------------------|-----|---------------------------------------------------------------------------------------------------------------------------------------------------------------------------------------------------------------------------------------------------------------------------------------------------------------------------------------------------------------------------------------------------------------|-------------------------------------------|
| Participants             | 13* | (a) Report numbers of individuals at each stage of study—eg numbers potentially eligible, examined for eligibility, confirmed eligible, included in the study, completing follow-up, and analysed<br>(b) Give reasons for non-participation at each stage<br>(c) Consider use of a flow diagram                                                                                                               | 9<br>-<br>-                               |
| Descriptive data         | 14* | (a) Give characteristics of study participants (eg demographic, clinical, social) and information on exposures and potential confounders<br>(b) Indicate number of participants with missing data for each variable of interest<br>(c) Summarise follow-up time (eg, average and total amount)                                                                                                                | 9 + table 1<br>9 + table 1<br>9 + table 2 |
| Outcome data             | 15* | Report numbers of outcome events or summary measures over time                                                                                                                                                                                                                                                                                                                                                | 9 + table 2                               |
| Main results             | 16  | (a) Give unadjusted estimates and, if applicable, confounder-adjusted estimates and their precision (eg, 95% confidence interval). Make clear which confounders were adjusted for and why they were included<br>(b) Report category boundaries when continuous variables were categorized<br>(c) If relevant, consider translating estimates of relative risk into absolute risk for a meaningful time period | 9 – 11 +<br>Figure 1 – 3<br>-<br>-        |
| Other analyses           | 17  | Report other analyses done—eg analyses of subgroups and interactions, and sensitivity analyses                                                                                                                                                                                                                                                                                                                | 11                                        |
| <b>Discussion</b>        |     |                                                                                                                                                                                                                                                                                                                                                                                                               |                                           |
| Key results              | 18  | Summarise key results with reference to study objectives                                                                                                                                                                                                                                                                                                                                                      | 11                                        |
| <b>Limitations</b>       |     |                                                                                                                                                                                                                                                                                                                                                                                                               |                                           |
| Interpretation           | 20  | Give a cautious overall interpretation of results considering objectives, limitations, multiplicity of analyses, results from similar studies, and other relevant evidence                                                                                                                                                                                                                                    | 11-12                                     |
| Generalisability         | 21  | Discuss the generalisability (external validity) of the study results                                                                                                                                                                                                                                                                                                                                         | 11- 15                                    |
| <b>Other information</b> |     |                                                                                                                                                                                                                                                                                                                                                                                                               |                                           |
| Funding                  | 22  | Give the source of funding and the role of the funders for the present study and, if applicable, for the original study on which the present article is based                                                                                                                                                                                                                                                 | 16                                        |

\*Give information separately for cases and controls in case-control studies and, if applicable, for exposed and unexposed groups in cohort and cross-sectional studies.

**Note:** An Explanation and Elaboration article discusses each checklist item and gives methodological background and published examples of transparent reporting. The STROBE checklist is best used in conjunction with this article (freely available on the Web sites of PLoS Medicine at <http://www.plosmedicine.org/>, Annals of Internal Medicine at <http://www.annals.org/>, and Epidemiology at <http://www.epidem.com/>). Information on the STROBE Initiative is available at [www.strobe-statement.org](http://www.strobe-statement.org).

# BMJ Open

## Infection-related complications after common infection in association with new antibiotic prescribing in primary care: retrospective cohort study using linked electronic health records

|                                 |                                                                                                                                                                                                                                                                                                                                                                                                                                                                                                                                                                                                                                                                                         |
|---------------------------------|-----------------------------------------------------------------------------------------------------------------------------------------------------------------------------------------------------------------------------------------------------------------------------------------------------------------------------------------------------------------------------------------------------------------------------------------------------------------------------------------------------------------------------------------------------------------------------------------------------------------------------------------------------------------------------------------|
| Journal:                        | <i>BMJ Open</i>                                                                                                                                                                                                                                                                                                                                                                                                                                                                                                                                                                                                                                                                         |
| Manuscript ID                   | bmjopen-2020-041218.R2                                                                                                                                                                                                                                                                                                                                                                                                                                                                                                                                                                                                                                                                  |
| Article Type:                   | Original research                                                                                                                                                                                                                                                                                                                                                                                                                                                                                                                                                                                                                                                                       |
| Date Submitted by the Author:   | 17-Nov-2020                                                                                                                                                                                                                                                                                                                                                                                                                                                                                                                                                                                                                                                                             |
| Complete List of Authors:       | van Bodegraven, Birgitta; The University of Manchester, Health e-Research Centre<br>Palin, Victoria ; The University of Manchester, Health e-Research Centre<br>Mistry, Chirag; The University of Manchester, Health e-Research Centre<br>Sperrin, Matthew; The University of Manchester, Health e-Research Centre<br>White , Andrew; NHS Greater Manchester Shared Service<br>Welfare, William; Public Health England, North West<br>Ashcroft, Darren; The University of Manchester, Centre for Pharmacoepidemiology and Drug Safety, NIHR Greater Manchester Patient Safety Translational Research Centre<br>van Staa, Tjeerd; The University of Manchester, Health e-Research Centre |
| <b>Primary Subject Heading</b>: | General practice / Family practice                                                                                                                                                                                                                                                                                                                                                                                                                                                                                                                                                                                                                                                      |
| Secondary Subject Heading:      | Public health, Infectious diseases, Epidemiology, Health informatics                                                                                                                                                                                                                                                                                                                                                                                                                                                                                                                                                                                                                    |
| Keywords:                       | EPIDEMIOLOGY, INFECTIOUS DISEASES, Quality in health care < HEALTH SERVICES ADMINISTRATION & MANAGEMENT, Health policy < HEALTH SERVICES ADMINISTRATION & MANAGEMENT, Health informatics < BIOTECHNOLOGY & BIOINFORMATICS, Adverse events < THERAPEUTICS                                                                                                                                                                                                                                                                                                                                                                                                                                |
|                                 |                                                                                                                                                                                                                                                                                                                                                                                                                                                                                                                                                                                                                                                                                         |

SCHOLARONE™  
Manuscripts



I, the Submitting Author has the right to grant and does grant on behalf of all authors of the Work (as defined in the below author licence), an exclusive licence and/or a non-exclusive licence for contributions from authors who are: i) UK Crown employees; ii) where BMJ has agreed a CC-BY licence shall apply, and/or iii) in accordance with the terms applicable for US Federal Government officers or employees acting as part of their official duties; on a worldwide, perpetual, irrevocable, royalty-free basis to BMJ Publishing Group Ltd ("BMJ") its licensees and where the relevant Journal is co-owned by BMJ to the co-owners of the Journal, to publish the Work in this journal and any other BMJ products and to exploit all rights, as set out in our [licence](#).

The Submitting Author accepts and understands that any supply made under these terms is made by BMJ to the Submitting Author unless you are acting as an employee on behalf of your employer or a postgraduate student of an affiliated institution which is paying any applicable article publishing charge ("APC") for Open Access articles. Where the Submitting Author wishes to make the Work available on an Open Access basis (and intends to pay the relevant APC), the terms of reuse of such Open Access shall be governed by a Creative Commons licence – details of these licences and which [Creative Commons](#) licence will apply to this Work are set out in our licence referred to above.

Other than as permitted in any relevant BMJ Author's Self Archiving Policies, I confirm this Work has not been accepted for publication elsewhere, is not being considered for publication elsewhere and does not duplicate material already published. I confirm all authors consent to publication of this Work and authorise the granting of this licence.

1  
2  
3  
4 **Infection-related complications after common infection in**  
5  
6 **association with new antibiotic prescribing in primary care:**  
7  
8 **retrospective cohort study using linked electronic health records**  
9  
10

11  
12 Birgitta van Bodegraven<sup>1</sup> (0000-0002-8359-9017), Victoria Palin<sup>1</sup> (0000-0002-0851-8619),  
13  
14 Chirag Mistry<sup>1</sup>, Matthew Sperrin<sup>1</sup> (0000-0002-5351-9960), Andrew White<sup>2</sup>, William Welfare<sup>3</sup>  
15  
16 (0000-0002-8304-1048), Darren M Ashcroft<sup>4</sup> (0000-0002-2958-915X), Tjeerd Pieter van  
17  
18 Staa<sup>1,5</sup> (0000-0001-9363-742X)  
19

20  
21 <sup>1</sup> Health e-Research Centre, Health e-Research Centre, School of Health Sciences, Faculty of  
22  
23 Biology, Medicine and Health, The University of Manchester, Oxford Road, Manchester, M13 9PL, UK  
24

25 <sup>2</sup> NHS Greater Manchester Shared Service, Ellen House, Waddington Street, Oldham, OL9 6EE, UK  
26

27 <sup>3</sup> Public Health England North West, 3 Piccadilly Place, London Road, Manchester, M1 3BN, UK  
28

29  
30 <sup>4</sup> Centre for Pharmacoepidemiology and Drug Safety, NIHR Greater Manchester Patient Safety  
31  
32 Translational Research Centre, School of Health Sciences, Faculty of Biology, Medicine and Health,  
33  
34 Manchester Academic Health Science Centre (MAHSC), The University of Manchester, Oxford Road,  
35  
36 Manchester, M13 9PL, UK  
37

38 <sup>5</sup> Utrecht Institute for Pharmaceutical Sciences, Utrecht University, Utrecht, the Netherlands  
39

40  
41 **Correspondence to:** Birgitta van Bodegraven, birgitta.vanbodegraven@manchester.ac.uk,  
42  
43 alternative: Tjeerd van Staa, tjeerd.vanstaa@manchester.ac.uk  
44

45  
46 **Keywords:** Antibiotic prescription, hospitalisation, infection-related complications, common  
47  
48 infection, primary care  
49

50  
51 **Word count:** 4073  
52  
53  
54  
55  
56  
57  
58  
59  
60

## ABSTRACT

**Objective** Determine the association of incident antibiotic prescribing levels for common infections with infection-related complications and hospitalisations by comparing high with low prescribing GP practices.

**Design** Retrospective cohort study.

**Data source** UK primary care records from the Clinical Practice Research Datalink (CPRD GOLD) and SAIL Databank (SAIL) linked with Hospital Episode Statistics (HES) data, including 546 CPRD, 346 CPRD-HES and 338 SAIL-HES practices.

**Exposures** Initial general practice visit for one of six common infections and the proportion of antibiotic prescribing in each practice.

**Main outcome measures** Incidence of infection-related complications (as recorded in general practice) or infection-related hospital admission within 30 days after consultation for a common infection.

**Results** A practice with 10.4% higher antibiotic prescribing (the interquartile range (IQR)) was associated with a 5.7% lower rate of infection-related hospital admissions (adjusted analysis, 95% Confidence Interval 3.3% to 8.0%). The association varied by infection with larger associations in hospital admissions with lower respiratory tract infection (16.1%; 12.4% to 19.7%) and urinary tract infection (14.7%; 7.6% to 21.1%) and smaller association in hospital admissions for upper respiratory tract infection (6.5%; 3.5% to 9.5%) The association of antibiotic prescribing levels and hospital admission was largest in patients aged 18-39 (8.6%; 4.0% to 13.0%) and smallest in the elderly aged 75+ (0.3%; -3.4% to 3.9%).

**Conclusions** There is an association between lower levels of practice level antibiotic prescribing and higher infection-related hospital admissions. Indiscriminately reducing antibiotic prescribing may lead to harm. Greater focus is needed to optimise antibiotic use by



1  
2  
3 reducing inappropriate antibiotic prescribing and better targeting antibiotics to patients at  
4 high risk of infection-related complications.  
5  
6  
7

## 8 **ARTICLE SUMMARY**

### 9 **Strengths and limitations of this study**

- 10 • Two large primary care databases with linked hospitalisation data were used to evaluate  
11 the difference in hospital admission after community acquired common infections  
12 comparing high with low prescribing GP practices.
- 13 • This analysis focusses on antibiotic prescribing at practice level with the emphasis on  
14 evaluating governmental guidance on reducing overall prescribing.
- 15 • Incidental antibiotic prescriptions without details on local antibiotic resistance levels were  
16 evaluated in this analysis and the results can only be interpreted in this context.
- 17 • No data was extracted on infection severity or symptom scores therefore no conclusions  
18 can be drawn on the appropriateness of antibiotics prescribed.

## 19 **INTRODUCTION**

20  
21  
22  
23  
24  
25  
26  
27  
28  
29  
30  
31  
32  
33  
34  
35 Common infections, such as sore throat or sinusitis, are often self-limiting and usually get  
36 better without antibiotics; nevertheless, they are frequently prescribed [1,2]. Research  
37 regarding antimicrobial resistance (AMR) and antibiotic prescribing rates often focuses on  
38 reducing inappropriate prescribing to lower the threat of increasing antimicrobial resistance  
39 [3]. Antibiotic prescribing for common self-limiting infections is often seen as a target for  
40 reduction [3,4]. However, a proportion of common infections are caused by bacterial  
41 infections that may progress and antibiotics may reduce infection-related adverse outcomes.  
42  
43  
44  
45  
46  
47  
48  
49

50 The UK AMR national action plan for 2019-2024 continues on from the last AMR strategy  
51 (2013-2018) with updated aims and targets to address the continued problem of resistance.  
52 One aim is to optimise antibiotic use through stewardship programmes, including a 25%  
53 reduction in antibiotic use in the community from the 2013 baseline [5]. Antibiotic prescribing  
54  
55  
56  
57  
58  
59  
60

1  
2  
3 in primary care in England shows a declining trend (-13.2%) between 2013 and 2017,  
4  
5 however, to reach desired reduction targets continued efforts are needed [3].  
6  
7

8 A small number of studies have analysed the relationship between antibiotic prescribing  
9  
10 rates and adverse events in primary care. Petersen *et al.* [6] (2007) and Gulliford *et al.* [7]  
11  
12 (2016) studied the relationship between antibiotic prescribing rates in primary care and  
13  
14 complication in patients with common respiratory tract infections (RTIs). Both studies  
15  
16 reported reductions in incidence of pneumonia, as recorded by the general practitioner (GP),  
17  
18 with higher levels of antibiotic prescribing. However, these studies did not evaluate the  
19  
20 association of prescribing rates with the rate of hospital admission after common infections  
21  
22 in primary care.  
23  
24

25 Gharbi *et al.* (2019) reported that prescribing immediate antibiotics in primary care to elderly  
26  
27 patients for urinary tract infection (UTI) was associated with a lower risk of bloodstream  
28  
29 infection, hospital admission, and all-cause mortality compared with no antibiotics and  
30  
31 deferred antibiotic prescribing [8]. However, antibiotic prescribing in primary care is known to  
32  
33 increase the risk of resistant infections [9]. This highlights the challenge in balancing  
34  
35 prescribing to reduce the risk of severe outcomes and limiting overall antibiotic consumption  
36  
37 to slow the development of AMR.  
38  
39

40 The association between practice antibiotic prescribing rates and the rate of hospital  
41  
42 admission after common infection when clearly separated from other infection-related  
43  
44 complications managed in the community has not previously been studied. There is  
45  
46 uncertainty with regards to the relationship between antibiotic prescribing levels and  
47  
48 complications that can arise after various common infections. The objective of this study was  
49  
50 to investigate the association between practice level antibiotic prescribing in primary care for  
51  
52 multiple common infections and the rate of infection-related complications through  
53  
54 comparison of high and low prescribing GP practices. These data provide insight into the  
55  
56 role of antibiotic prescribing patterns in controlling the rate of adverse events.  
57  
58  
59  
60

## **METHOD:**

### **Data sources**

The Clinical Practice Research Datalink (CPRD GOLD [10]) and the Secure Anonymised Information Linkage Databank (SAIL [11]) were used in this study. CPRD is a UK primary care database with routinely collected electronic health records [10]. All patients registered with a participating general practice are anonymously included in the dataset. Data has been collected from 1987 and represents about 8% of the UK population. CPRD is broadly representative of the general UK population in terms of age, sex, and ethnicity [10]. The SAIL databank is a data repository of anonymised personal data collected for research from 75% of Welsh general practices [11]. Within SAIL, individual GP practices share anonymised patient-level clinical information on symptoms, diagnoses and prescribed treatment. As Welsh GP practices are included in both CPRD and SAIL they have been removed from CPRD to avoid replication.

For both data sources, all patient level data was aggregated up to practice level. The final CPRD dataset contained 546 GP practices of which 346 (located in England only), were linked with hospital admitted patient care data (Hospital Episode Statistics (HES)). The SAIL Databank included 338 GP practices, all linked to HES.

### **Selection and eligibility criteria:**

The CPRD study population included patients with a consultation between 1st January 2000 and 30th June 2015; for SAIL, the time period was between 1st January 2000 and 31st December 2017. The study population included patients with an initial GP consultation and clinical Read code for a common infection. This was defined as the first incident consultation for a common infection within six months and without an antibiotic prescription in the previous one month. Six common infections were included: upper respiratory tract infection (URTI, cough or cold, sore throat), lower respiratory tract infection (LRTI), otitis externa, otitis media, sinusitis, and urinary tract infection (UTI).

1  
2  
3 Patients were eligible to be included if they were permanently registered at the GP practice,  
4 had a minimum of one year follow-up since data collection (except for children under one),  
5 and at least one record of an incident common infection. Male and females of any age were  
6 eligible. Patients were not required to have an antibiotic prescribed at the time of visit for  
7 common infection. Patients with an infection-related complication or an infection-related  
8 hospital admission in the six months prior or on the day of consultation were excluded.  
9 Individual patients were able to contribute multiple infection episodes, as long as the  
10 consultations were at least 6 months apart.

### 21 **Exposure and outcomes:**

22  
23 The number of patients who received an antibiotic at the consultation was determined. The  
24 practice antibiotic prescribing rate was the percentage of consultations that resulted in an  
25 antibiotic prescription in the complete study period.

26  
27 Infection-related hospital admission was identified using the primary admission diagnosis  
28 using ICD-10 codes from the linked HES data. This outcome was evaluated using the  
29 CPRD-HES and SAIL-HES datasets. The second outcome evaluated was infection-related  
30 complications as recorded in the primary care records identified from Read codes. Both  
31 outcomes were evaluated during the 30 days after the initial common infection consultation.  
32 In case of death or end of data collection within these 30 days, observations were censored.  
33 The outcomes were evaluated using the CPRD and SAIL datasets.

34  
35 Person time at risk was calculated for the registered CPRD and SAIL population by counting  
36 the days without diagnosis of infection-related complications during the 30 day follow-up  
37 after the date of common infection. The rates of infection-related outcomes were calculated  
38 by dividing the number of events by the person time at risk (per 1000 person-month). The  
39 outcomes were identified based on pre-defined code lists. Compiled code lists are available  
40 on [clinicalcodes.org](http://clinicalcodes.org) [12], ICD-10 codes are available from van Staa *et al.* (2020)[13]. The  
41 codes for outcomes and infections used were reviewed independently by two clinical  
42 epidemiologists. Infection-related hospital admission includes codes for admission such as

1  
2  
3 for sepsis, endocarditis, acute respiratory tract infection, or bacterial meningitis. Infection-  
4 related complications as recorded in the primary care records includes any revisit to the GP  
5 for infection-related complications such as pneumonia, sepsis, quinsy, mastoiditis, or  
6 meningitis in the 30 day follow-up period. The same set of conditions were included in both  
7 outcomes.  
8  
9  
10  
11  
12

### 13 **Confounders**

14  
15  
16 The analysis was adjusted with the scaled mean at practice level of age, vaccination against  
17 influenza, and hospital admission in the previous year. Additionally, the analysis was  
18 adjusted with the scaled proportion of each category at practice level of the following  
19 categorical characteristic: Sex, Charlson Comorbidity Index [14], body mass index (BMI),  
20 smoking status (never, currently, past, unknown), and socioeconomic status (SES, least  
21 deprived to most deprived). The proportion of socioeconomic status (SES) was derived from  
22 patients with linkage to IMD quintiles. Linked Index of Multiple Deprivation (IMD) data in  
23 quintiles based on patient's residential postcode were available for both datasets. Census  
24 based IMD data measures deprivation at area-level based on domains, such as income,  
25 employment, health, housing, and general environment [15].  
26  
27  
28  
29  
30  
31  
32  
33  
34  
35  
36  
37

38 Additionally, analyses using CPRD and CPRD-HES were adjusted with the mean at practice  
39 level of the number of GPs per 1000 consults, the patient transfer-out rate and region. No  
40 imputations or other adjustments were performed for missing characteristics in the  
41 covariates. Missing data was present for the following covariates; BMI (CPRD: 41.4%),  
42 Smoking status (CPRD: 30.4%), and socioeconomic status (CPRD: 37.3%).  
43  
44  
45  
46  
47  
48

### 49 **Statistical analysis**

50  
51 Infection-related complications were modelled with negative binomial regression using  
52 practice level antibiotic prescribing as a predictor and the log of person time at risk as an  
53 offset. The unit of analysis is the practice. All variables were scaled with their associated  
54 interquartile range (IQR: 75th to 25th percentile) by dividing the original values by the IQR  
55  
56  
57  
58  
59  
60

1  
2  
3 from the variable [16]. This creates a natural comparison between high and low prescribing  
4 GP practices. The antibiotic prescribing rate was modelled continuously. Because of the  
5 scaling the IQR becomes the unit that the effect size is expressed in. Both outcomes were  
6 compared against all common infections in the initial analysis. Models were adjusted for  
7 missing data using a covariate specific missing data indicator. The association of each of the  
8 six common infections was then studied against both outcomes separately. The analyses  
9 were further stratified by gender and age categories: 0-17, 18-39, 40-59, 60-74, 75+ years  
10 old to evaluate the varied prescribing among these risk groups. The beta coefficient of the  
11 antibiotic prescribing rate was exponentiated and is presented as an incidence rate ratio  
12 (IRR). The effect estimates from the CPRD and SAIL cohorts were combined using a meta-  
13 analysis method with inverse variance weighting and DerSimonian and Laird random effect  
14 models.

15  
16 Absolute difference in antibiotic prescribing between high and low prescribing practices was  
17 calculated from the prescribing rates (25th and 75th percentiles) and mean events per  
18 practice. The absolute difference in infection-related complications between high and low  
19 prescribing was calculated using the complication rate and the IRR. The number needed to  
20 treat (NNT) with antibiotics to prevent one event of hospital admission was calculated by  
21 dividing the absolute difference in antibiotic prescribing by the absolute difference in  
22 complications. Forestplot [17], dplyr [18], and MASS [19] packages in R were used for the  
23 analysis. All analyses were performed using R-software version 3.4.1 (R Foundation for  
24 Statistical Computing; Vienna, Austria).

### 25 26 27 28 **Patient and public involvement**

29 No patients were involved in the study design and no patients were asked to consult on the  
30 outcomes or interpretation of the results. Results will be disseminated to relevant patient  
31 communities through news media and social media.  
32  
33  
34  
35  
36  
37  
38  
39  
40  
41  
42  
43  
44  
45  
46  
47  
48  
49  
50  
51  
52  
53  
54  
55  
56  
57  
58  
59  
60

## RESULTS

The study was based on a total of 19.6 million GP consultations for common infections. URTI was the most frequent common infection (CPRD: 9,646,774) followed by LRTI (CPRD: 2,288,616) and UTI (CPRD: 1,511,176). A total of 884 GP practices were included in the analysis (CPRD: 546; SAIL: 338) (Table 1). The mean age of the practice population was 38 years in CPRD and 30 years in SAIL. The majority of patients had no comorbidities recorded (Charlson score: 0). There were 25,721 cases of infection-related complications as recorded in primary care in CPRD and 15,192 cases in SAIL. The rate of these complications was 1.3 and 4.1 per 1000 person-months respectively. For infection-related hospital admission, the number of cases was 17,810 in CPRD-HES and 19,796 in SAIL-HES, with rates of 1.4 and 5.1 per 1000 person-months, respectively (Table 2). The majority of antibiotics were prescribed for LRTI, Sinusitis, and UTI (Table 3). Antibiotics were less likely to be prescribed for Otitis Externa. There was considerable variability between general practices in the percentages of patients prescribed an antibiotic. For URTI, 28.6% of the patients received an antibiotic at the 5th percentile practice and 66.4% at the 95th percentile practice. Summary counts of infection-related hospital admission types from CPRD-HES are available in appendix 1, supplementary material.

### Infection-related hospital admission

The incidence of infection-related hospital admission was found to be associated with the practice-level antibiotic prescribing rate (Figure 1). A 10.4% higher antibiotic prescribing rate (IQR) was associated with an IRR of 0.943 (0.920 to 0.967), denoting a 5.7% lower infection-related hospital admission rate in the combined analysis. Results between CPRD-HES and SAIL-HES were comparable. In CPRD-HES, a 10.1% higher antibiotic prescribing rate was associated with an IRR of 0.959 (0.926 to 0.992), meaning a 4.1% lower hospital admission rate. For SAIL-HES, this was 7.2% (IRR: 0.928; 0.895 to 0.961) lower with the IQR of 10.7% higher antibiotic prescribing by GP practices.



1  
2  
3 The observed association varied by infection. In the combined analysis, the largest  
4 association was observed in LRTI (IRR: 0.839(16.1%); 0.803 to 0.876), UTI (IRR: 0.853  
5 (0.788 to 0.924); 14.7%), and URTI (IRR: 0.935 (0.905 to 0.965); 6.5%) (Figure 2). In  
6 patients with URTI, 14.9% (CPRD-HES) and 17.2% (SAIL-HES) higher antibiotic prescribing  
7 was associated with infection-related hospital admissions being lower by 7.7% (0.923; 0.879  
8 to 0.969) and 5.6% (0.944; 0.905 to 0.984). LRTI was associated with a 14.2% (CPRD-HES,  
9 IRR: 0.858; 0.808 to 0.911) and 18.2% (SAIL-HES, IRR: 0.818; 0.767 to 0.872) lower  
10 incidence for hospital admission when antibiotic prescribing was higher by 8.7% and 15.1%.  
11 In patients who consulted their GP for UTI, the incidence of hospital admission was 10.5%  
12 (IRR: 0.895 (0.783 to 1.027) lower with 7.6% higher antibiotic prescribing (CPRD-HES). In  
13 SAIL-HES, 12.0% higher antibiotic prescribing for UTI was associated with lower incidence  
14 by 16.8% (IRR: 0.832 (0.755 to 0.919)). Patients aged 18-39 years old had the largest  
15 association for hospital admission (CPRD-HES: 0.884 (0.823 to 0.949; IQR unit: 10.88))  
16 amongst the age categories (figure 3).  
17  
18  
19  
20  
21  
22  
23  
24  
25  
26  
27  
28  
29  
30  
31  
32

33 The number needed to treat with antibiotics to prevent one patient from developing infection-  
34 related complications was calculated over the 30 day follow-up period. The number needed  
35 to treat for patients with URTI at risk of hospital admission was 1164. For patients with LRTI  
36 and UTI the number needed to treat was 417 and 484 respectively.  
37  
38  
39  
40  
41

### 42 **GP-recorded infection-related complications**

43 Higher levels of antibiotic prescribing by GP practices were associated with lower incidence  
44 of infection-related complication as recorded by the GP. The incidence of GP-recorded  
45 infection-related complications reduced by 16.9% (0.831; 0.791 to 0.873) and 9.0% (0.910;  
46 0.866 to 0.954) with an increase in antibiotic prescribing of 10.4% and 10.6% for CPRD and  
47 SAIL respectively.  
48  
49  
50  
51  
52  
53  
54

55 Evaluating the observed association by common infection separately found that URTI was  
56 associated with lower GP-recorded infection-related complications by 20.4% (0.803; 0.758 to  
57 0.852) when antibiotic prescribing increased by 15.5% in CPRD. In SAIL, the observed  
58  
59  
60

1  
2  
3 reduction was 12.7% (0.873; 0.832 to 0.916) when antibiotic prescribing increased by  
4  
5 17.2%.  
6

7  
8 Antibiotic prescribing for LRTI being higher by 9.1% and 15.1% was associated with the  
9  
10 incidence of GP-recorded infection-related complications being lower by 16.2% (IRR: 0.838;  
11  
12 0.786 to 0.895) and 5.5% (IRR: 0.945; 0.871 to 1.027) for CPRD and SAIL respectively. For  
13  
14 UTI, the incidence of GP-recorded infection-related complications was similarly lowered  
15  
16 across CPRD (15.6%; 0.844 (0.770 to 0.926) (IQR unit: 8.01)) and SAIL (8.7%; 0.913 (0.838  
17  
18 to 0.997) (IQR unit: 11.95)).  
19

20  
21 No effect modification by gender was observed in any of the datasets evaluated (Figure 3).  
22  
23 The effect was more obvious in younger patients. Patients aged 0-17 had the largest  
24  
25 association in GP-recorded infection-related complications in CPRD (22%; IRR: 0.780 (0.725  
26  
27 to 0.839); IQR: 12.05). Patients aged 0-17 years and 40-59 showed similar associations for  
28  
29 both datasets (Figure 3). Polynomials were fitted on a deciled antibiotic prescribing rate as a  
30  
31 sensitivity analysis. First order polynomials best fitted the data and showed a downward  
32  
33 linear trend from low to high prescribing (Supplementary material, appendix 2). An inverse  
34  
35 association was found in an additional sensitivity analysis which paired URTI and LRTI with  
36  
37 plausible subsequent infection-related complications, such as pneumonia and hospital  
38  
39 admission for LRTI (Supplementary material, appendix 3. In patients who consulted their GP  
40  
41 for LRTI, the incidence of a hospital admission with LRTI was 18% (0.820 (0.765 - 0.879))  
42  
43 lower with 8.7% higher antibiotic prescribing (CPRD-HES).  
44  
45  
46

## 47 **DISCUSSION**

48  
49 This study found that higher levels of incident antibiotic prescribing by practices were  
50  
51 associated with lower rates of hospital admission and GP diagnosed infection-related  
52  
53 complications. Lower rate of poor clinical outcomes with higher levels of antibiotic  
54  
55 prescribing was more pronounced for URTI, LRTI, and UTI but had no association with poor  
56  
57 outcomes for otitis media and otitis externa. A higher level of incident antibiotic prescribing in  
58  
59  
60

1  
2  
3 younger patients was associated with better clinical outcomes while no association was  
4  
5 observed in patients over 40 years old.  
6  
7

8 This is the first study to use two large primary care databases with linked hospitalisation data  
9  
10 to evaluate the difference in hospital admission after common infections comparing high with  
11  
12 low prescribing GP practices. The focus of this analysis was at practice level with the  
13  
14 emphasis on evaluating governmental guidance on reducing overall prescribing. Practice  
15  
16 level prescribing proportion as a standardised antibiotic measure allows for comparing the  
17  
18 range of GP prescribing within and between datasets with similar inclusion criteria. Other  
19  
20 standard measures, such as age- and sex-adjusted STAR-PU prescribing units, are  
21  
22 available although the research question here specifically focussed on the reduction of  
23  
24 overall antibiotic prescribing levels regardless of patient-mix within a practice. The study  
25  
26 population was restricted to new antibiotic prescribing in patients with newly developed  
27  
28 common infections. Including patients with more complex clinical scenarios, like repeated  
29  
30 antibiotic users, complicates the estimation of the effect of interest. Past consultations and  
31  
32 potential treatment for a common infection may be associated with future consultations,  
33  
34 treatment, and future outcomes of interest. This will lead to a problem when the outcome of  
35  
36 interest cannot be related back to a single index visit and instead potentially to more than  
37  
38 one visit. The results of this analysis can only be interpreted in the context of the incidental  
39  
40 antibiotic user.  
41  
42  
43

44 This practice level analysis possibly simplifies the relationship between antibiotic prescribing  
45  
46 rate and infection-related complications by aggregating data up to practice level and ignoring  
47  
48 diversity in patient characteristics within a practice. Some potential confounding at practice  
49  
50 level may occur due to variation in patient population frailty even when characteristics have  
51  
52 been accounted for at practice level [20]. In addition, although this analysis attempted to  
53  
54 adjust for several available factors which might influence the association investigated,  
55  
56 missing data was present in some of the covariates. The analyses accounted for this by  
57  
58 using a missing indicator and the presence of missing data in the covariates could have  
59  
60

1  
2  
3 influenced the estimates, although the large sample size and replication of the analysis in a  
4 second database (SAIL) gives weight to the interpretation of the results. There remains a  
5 potential for additional residual confounding by non-available covariates or other factors,  
6 such as quality of care, access to GPs and practices, and availability of consultations, all of  
7 which have been linked to deprivation [21,22]. However, without specific knowledge of a  
8 physician's prescribing preference relative to guidance, or qualitative data regarding patient  
9 care, it is not possible to evaluate the effects of these factors on the observed prescribing  
10 levels. Diagnoses are based on clinical coding both in primary and secondary care and  
11 potential misclassifications or misdiagnoses in the underlying data could have occurred.  
12 Differences in coding practices for common infections among English GP practices has been  
13 evaluated previously and found to be problematic at times [4]. As no data were available on  
14 infection severity or symptom scores, no conclusions can be drawn on the appropriateness  
15 of antibiotics prescribed. This analysis was based on digital patient charts without access to  
16 free-text due to GDPR rules as this poses a possible patient identification risk. Digital patient  
17 charts are automatically generated and transferred to the database. In addition, a small  
18 proportion of prescribing may be attributable to out of hours prescribing where coding of  
19 these consultation or prescriptions into the patient's record is performed afterwards and  
20 therefore subject to error and misclassification, potentially leading to an overestimation of the  
21 observed association.  
22  
23  
24  
25  
26  
27  
28  
29  
30  
31  
32  
33  
34  
35  
36  
37  
38  
39  
40  
41  
42  
43

44 The incidence rates of the clinical outcomes were different between SAIL and CPRD, with  
45 higher rates in Wales. There has been a measles epidemic in Wales recently which may  
46 partly explain these differences. However, this remains speculative. Infections are often  
47 localised and infection rates differ between locations. In addition, another possible  
48 explanation could be that this difference is due to coding behaviour. However, the level of  
49 data available does not allow in-depth investigation into this difference. The NNTs presented  
50 are related to the 30 day follow-up window. They may appear large and initial clinical  
51 relevance uncertain. UK guidance for initiating statin use states those with a 10-year risk of  
52  
53  
54  
55  
56  
57  
58  
59  
60

1  
2  
3 10-19% are eligible. Converting this 10-year risk to a 30 day estimated NNT gives a NNT of  
4  
5 1139 (10%) and 569 (19%). These NNTs are similar to those presented in this analysis and  
6  
7 have led to a change in clinical practice and prescribing behaviour.  
8  
9

10 Those with weaker immune systems, the very young and very old, have an elevated  
11  
12 susceptibility to infections which may increase their antibiotic use and risk of related  
13  
14 complications [23]. Analysis performed by age group showed that higher levels of antibiotic  
15  
16 prescribing were associated with reduced infection-related complications in younger  
17  
18 patients. Higher levels of antibiotic prescribing were not associated with lower rates of  
19  
20 infection-related complications in patients aged 60+ years. A possible explanation for this is  
21  
22 that increased lifetime exposure and repeated use of antibiotics could reduce antibiotic  
23  
24 effectiveness, for example due to altered pharmacokinetics [24] . Recent research reported  
25  
26 reduced effectiveness of antibiotics with repeated use over several years [13]. A literature  
27  
28 review by Costelloe *et al.* (2010) found that individuals who were prescribed an antibiotic for  
29  
30 respiratory or urinary tract infections develop bacterial resistance that was detectable for up  
31  
32 to 12 months [9]. Similar association has been reported recently for resistant blood stream  
33  
34 infection after UTI prescribing [25]. However, further research is needed to assess any age  
35  
36 effect in the effectiveness of antibiotics. Another reason may be that GPs may be more  
37  
38 hesitant to withhold antibiotics from older patients to avoid under-treatment, leading to  
39  
40 seeing a greater response in younger patients at higher prescribing rates.  
41  
42  
43

44 The more antibiotics prescribed, the higher the GP re-attendance rates for common  
45  
46 infections and subsequently the larger the re-prescribing antibiotic rate becomes [26]. A  
47  
48 randomised trial involving 34 general practices following the STAR educational programme  
49  
50 saw reductions in overall levels of antibiotic prescribing in the intervention group [27].  
51  
52 Hospital admission for respiratory tract infections and complications increased by 1.9% in  
53  
54 the intervention group, suggesting that reduced antibiotic prescribing may increase hospital  
55  
56 admission. However, this result was not found to be statistically different and had limited  
57  
58 statistical power.  
59  
60

1  
2  
3 UK initiatives have included the TARGET toolkit and the Quality Premium (QP) to reduce  
4 overall levels of antibiotic use [27–29]. The QP was introduced in April 2015 and provided a  
5 financial incentive to Clinical Commissioning Groups (CCGs) to reduce antibiotic prescribing  
6 rates. A significant 3% reduction in antibiotic prescribing rate was observed after this  
7 initiative was introduced, with greatest reduction in children [30]. Reducing antibiotic  
8 prescribing rates may be good for antibiotic resistance, but as shown here could potentially  
9 cause more infection-related complications. Antibiotic prescribing requires a careful balance;  
10 with each prescription to treat and reduce the risk of infection-related complications, the  
11 chance of developing resistant infections increases for individual patients and drives AMR  
12 risk for the wider community. With the current aim to reduce antibiotic prescribing in the  
13 community in the UK by 25% from the 2013 baseline, particular focus is required to  
14 understand individual patient risk, reducing inappropriate prescribing and monitor infection  
15 related complications. For patients with LRTI in primary care, Moore *et al.* [31] modelled a  
16 predictive value of the risk of patients developing serious outcomes including hospital  
17 admission. Such a direct approach, together with delayed prescribing strategies [32] are  
18 suggested to target prescribing to those most likely to develop complications and reduce  
19 overall prescribing.

20  
21  
22 A Cochrane review of 27 trials on antibiotics for sore throat found that antibiotics prevented  
23 complications (acute rheumatic fever, glomerulonephritis, otitis media, and sinusitis) in  
24 patients (NNT to benefit = 200), but the rate of complications were low (approximately 0.7%)  
25 the benefit of antibiotic prescribing may not always be clear [33]. Similarly another Cochrane  
26 review focused on antibiotics for acute otitis media in children found that serious  
27 complications, such as mastoiditis and meningitis, were rare (3/3000 children)[34]. Both  
28 reviews highlighted the inability to predict which patients are at risk of developing  
29 complications. Clinical tools such as the FeverPAIN score and Centor criteria are used to  
30 guide antibiotic treatment for acute sore throat. However, Little *et al.* (2013) concluded that  
31  
32  
33  
34  
35  
36  
37  
38  
39  
40  
41  
42  
43  
44  
45  
46  
47  
48  
49  
50  
51  
52  
53  
54  
55  
56  
57  
58  
59  
60

1  
2  
3 clinical scores such as FeverPAIN were of limited value in predicting clinical complications  
4  
5 [35].  
6

7  
8 In conclusion, lower levels of practice level antibiotic prescribing were associated with higher  
9  
10 levels of infection-related complications and hospital admissions. Identifying and developing  
11  
12 accurate clinical tools for predicting which patients are at risk of complications requires much  
13  
14 needed further research. To improve patient outcomes and reduce the risk of avoidable  
15  
16 complications, there is a need to target patients most likely to benefit from effective, safe  
17  
18 prescribing, based on shared decision making.  
19  
20  
21  
22  
23  
24  
25  
26  
27  
28  
29  
30  
31  
32  
33  
34  
35  
36  
37  
38  
39  
40  
41  
42  
43  
44  
45  
46  
47  
48  
49  
50  
51  
52  
53  
54  
55  
56  
57  
58  
59  
60

For peer review only



## NOTES

**Funding:** This work was supported by Connected Health Cities which is a Northern Health Science Alliance led programme funded by the Department of Health and Social Care and delivered by a consortium of academic and National Health Service organisations across the north of England. This study is partly based on data from the Clinical Practice Research Datalink obtained under licence from the UK Medicines and Healthcare products Regulatory Agency (MHRA). HES data is subject to Crown copyright (2018) protection, re-used with the permission of The Health, & Social Care Information Centre, all rights reserved. The data is provided by patients and collected by the NHS as part of their care and support. This study also used anonymised data held in the Secure Anonymised Information Linkage (SAIL) System, which is part of the national e-health records infrastructure for Wales. The interpretation and conclusions contained in this study are those of the authors alone, and not necessarily those of the SAIL, MHRA, NHTA, NHS or the Department of Health.

**Conflict of interest:** All authors have completed the ICMJE uniform disclosure form and declare: BvB, VP, CM, DA, TvS report grants from the Department of Health and Social Care for the submitted work; no financial relationships with any organisations that might have an interest in the submitted work in the previous three years; no other relationships or activities that could appear to have influenced the submitted work.

**Ethical approval:** The study protocol was approved by the Independent Scientific Advisory Committee for CPRD research [protocol number 16\_153] and SAIL's Information Governance Protocol Review Panel [protocol number 0693]. We would like to acknowledge all the data providers who make anonymised data available for research.

**Data sharing:** Read codes used are published on Clinicalcodes.org. Electronic health records are, by definition, considered sensitive data in the UK by the Data Protection Act and cannot be shared via public deposition because of information governance restriction in place to protect patient confidentiality. Access to data is available only once approval has been obtained through the individual constituent entities controlling access to the data.



1  
2  
3 CPRD data can be requested via application to the Clinical Practice Research Datalink  
4 (www.cprd.com), and SAIL data are available by application to the Secure Anonymised  
5 Information Linkage Databank (<https://saildatabank.com/>).  
6  
7  
8  
9

10 **Author contributor statement:** BvB and TvS contributed to the idea and design of the  
11 study. TvS extracted the relevant data from the databases. BvB analysed and interpreted the  
12 data with feedback from TvS and MS. BvB drafted the initial paper. VP, CM, MS, AW, WW,  
13 and DA contributed to drafts and critical revision for intellectual content. All authors approved  
14 the final manuscript.  
15  
16  
17  
18  
19  
20

## 21 REFERENCES

- 22 1. National Institute for Health and Care Excellence (NICE), NHS, Centre for Clinical  
23 Practice at NICE. Respiratory tract infections (self-limiting): prescribing antibiotics.  
24 2008. Available at: <https://www.nice.org.uk/guidance/cg69/chapter/1-guidance>.  
25  
26
- 27 2. Pouwels KB, Dolk FCK, Smith DRM, Robotham J V., Smieszek T. Actual versus 'ideal'  
28 antibiotic prescribing for common conditions in English primary care. *Journal of*  
29 *Antimicrobial Chemotherapy* **2018**; 73:ii19–ii26.  
30  
31
- 32 3. Public Health England. English surveillance programme for antimicrobial utilisation and  
33 resistance (ESPAUR) Report 2018. 2018. Available at:  
34 [https://www.gov.uk/government/publications/english-surveillance-programme-](https://www.gov.uk/government/publications/english-surveillance-programme-antimicrobial-utilisation-and-resistance-espaur-report)  
35 [antimicrobial-utilisation-and-resistance-espaur-report](https://www.gov.uk/government/publications/english-surveillance-programme-antimicrobial-utilisation-and-resistance-espaur-report).  
36  
37
- 38 4. Smieszek T, Pouwels KB, Dolk FCK, et al. Potential for reducing inappropriate  
39 antibiotic prescribing in English primary care. *Journal of Antimicrobial Chemotherapy*  
40 **2018**; 73:ii36–ii43.  
41
- 42 5. Department of Health and Social Care. UK 5-year action plan for antimicrobial  
43 resistance 2019 to 2024. 2019. Available at:  
44 [https://assets.publishing.service.gov.uk/government/uploads/system/uploads/attachme](https://assets.publishing.service.gov.uk/government/uploads/system/uploads/attachment_data/file/784894/UK_AMR_5_year_national_action_plan.pdf)  
45 [nt\\_data/file/784894/UK\\_AMR\\_5\\_year\\_national\\_action\\_plan.pdf](https://assets.publishing.service.gov.uk/government/uploads/system/uploads/attachment_data/file/784894/UK_AMR_5_year_national_action_plan.pdf).  
46  
47
- 48 6. Petersen I, Johnson AM, Islam A, Duckworth G, Livermore DM, Hayward AC.  
49 Protective effect of antibiotics against serious complications of common respiratory  
50 tract infections: retrospective cohort study with the UK General Practice Research  
51 Database. *BMJ (Clinical research ed)* **2007**; 335:982.  
52
- 53 7. Gulliford MC, Gulliford MC, Moore M V, et al. Safety of reduced antibiotic prescribing  
54 for self limiting respiratory tract infections in primary care: cohort study using electronic  
55 health records. *The BMJ* **2016**; 354:354:1–10.  
56
- 57 8. Gharbi M, Drysdale JH, Lishman H, et al. Antibiotic management of urinary tract  
58 infection in elderly patients in primary care and its association with bloodstream  
59 infections and all cause mortality: population based cohort study. *BMJ* **2019**; 364:i525.  
60

- 1  
2  
3 9. Costelloe C, Metcalfe C, Lovering A, Mant D, Hay AD. Effect of antibiotic prescribing in  
4 primary care on antimicrobial resistance in individual patients: Systematic review and  
5 meta-analysis. *BMJ (Online)* **2010**; 340:c2096.  
6
- 7 10. Herrett E, Gallagher AM, Bhaskaran K, et al. Data Resource Profile: Clinical Practice  
8 Research Datalink (CPRD). *Int J Epidemiol* **2015**; 44:827–836.  
9
- 10 11. Jones KH, Ford DV, Lyons RA. The SAIL Databank: 10 years of spearheading data  
11 privacy and research utility, 2007-2017. Swansea University Medical School, Ysgol  
12 Feddygaeth Prifysgol Abertawe **2017**; :15.  
13
- 14 12. University of Manchester, Institute of Population Health. ClinicalCodes Repository.  
15 Available at: <https://clinicalcodes.rss.mhs.man.ac.uk/>. Accessed 6 February 2020.  
16
- 17 13. van Staa TP, Palin V, Li Y, et al. The effectiveness of frequent antibiotic use in reducing  
18 the risk of infection-related hospital admissions: results from two large population-  
19 based cohorts. *BMC Medicine* **2020**; 18:40.  
20
- 21 14. Charlson ME, Pompei P, Ales KL, MacKenzie CR. A new method of classifying  
22 prognostic comorbidity in longitudinal studies: Development and validation. *Journal of*  
23 *Chronic Diseases* **1987**; 40:373–383.  
24
- 25 15. Government M of H Communities & Local. English indices of multiple deprivation 2015:  
26 technical report. 2015. Available at:  
27 [https://www.gov.uk/government/publications/english-indices-of-deprivation-2015-](https://www.gov.uk/government/publications/english-indices-of-deprivation-2015-technical-report)  
28 [technical-report](https://www.gov.uk/government/publications/english-indices-of-deprivation-2015-technical-report). Accessed 6 February 2020.  
29
- 30 16. Babyak MA. Rescaling continuous predictors in regression models. *Statistical Tips from*  
31 *the Editors of Psychosomatic Medicine*. 2009; Available at:  
32 <http://stattips.blogspot.com/2009/08/rescaling-continuous-predictors-in.html>. Accessed  
33 6 February 2020.  
34
- 35 17. Gordon M, Lumley T. Advanced Forest Plot Using ‘grid’ Graphics. 2017. Available at:  
36 <https://cran.r-project.org/web/packages/forestplot/forestplot.pdf>.  
37
- 38 18. Wickham H, François R, Henry L, Müller K. A Grammar of Data Manipulation; Package  
39 ‘dplyr’. 2019. Available at: <https://cran.r-project.org/web/packages/dplyr/dplyr.pdf>.  
40
- 41 19. Ripley B, Venables B, Bates DM, Hornik K, Gebhardt A, Firth D. Support Functions and  
42 Datasets for Venables and Ripley’s MASS. 2019. Available at: [https://cran.r-](https://cran.r-project.org/web/packages/MASS/MASS.pdf)  
43 [project.org/web/packages/MASS/MASS.pdf](https://cran.r-project.org/web/packages/MASS/MASS.pdf).  
44
- 45 20. Hope EC, Crump RE, Hollingsworth TD, Smieszek T, Robotham J V., Pouwels KB.  
46 Identifying English Practices that Are High Antibiotic Prescribers Accounting for  
47 Comorbidities and Other Legitimate Medical Reasons for Variation. *EClinicalMedicine*  
48 **2018**;  
49
- 50 21. Ashworth M, Armstrong D. The relationship between general practice characteristics  
51 and quality of care: a national survey of quality indicators used in the UK Quality and  
52 Outcomes Framework, 2004–5. *BMC Fam Pract* **2006**; 7:68.  
53
- 54 22. Ashworth M, Seed P, Armstrong D, Durbaba S, Jones R. The relationship between  
55 social deprivation and the quality of primary care: a national survey using indicators  
56 from the UK Quality and Outcomes Framework. *Br J Gen Pract* **2007**; 57:441–448.  
57  
58  
59  
60

- 1
- 2
- 3 23. Yoshikawa TT. Epidemiology and Unique Aspects of Aging and Infectious Diseases. *Clin Infect Dis* **2000**; 30:931–933.
- 4
- 5
- 6 24. Wehling M. Drug therapy for the elderly. Springer Science & Business Media, 2012.
- 7
- 8 25. Lishman H, Costelloe C, Hopkins S, et al. Exploring the relationship between primary
- 9 care antibiotic prescribing for urinary tract infections, Escherichia coli bacteraemia
- 10 incidence and antimicrobial resistance: an ecological study. *International Journal of*
- 11 *Antimicrobial Agents* **2018**; 52:790–798.
- 12
- 13 26. Little P, Gould C, Williamson I, Warner G, Gantley M, Kinmonth AL. Reattendance and
- 14 complications in a randomised trial of prescribing strategies for sore throat: the
- 15 medicalising effect of prescribing antibiotics. *BMJ* **1997**; 315:350.
- 16
- 17 27. Butler CC, Simpson SA, Dunstan F, et al. Effectiveness of multifaceted educational
- 18 programme to reduce antibiotic dispensing in primary care: practice based randomised
- 19 controlled trial. *BMJ* **2012**; 344:d8173.
- 20
- 21 28. Royal College of General Practitioners. TARGET antibiotics: Treat Antibiotics
- 22 Responsibly, Guidance, Education, Tools. 2013. Available at:
- 23 <http://www.rcgp.org.uk/clinical-and-research/toolkits/target-antibiotic-toolkit.aspx>.
- 24 Accessed 14 May 2018.
- 25
- 26 29. NHS England. Quality Premium: Guidance for 2017-19. 2018: 1–32. Available at:
- 27 <https://www.england.nhs.uk/ccg-out-tool/qual-prem/>. Accessed 14 May 2019.
- 28
- 29 30. Bou-Antoun S, Costelloe C, Honeyford K, et al. Age-related decline in antibiotic
- 30 prescribing for uncomplicated respiratory tract infections in primary care in England
- 31 following the introduction of a national financial incentive (the Quality Premium) for
- 32 health commissioners to reduce use of antibiotic. *Journal of Antimicrobial*
- 33 *Chemotherapy* **2018**; 73:2883–2892.
- 34
- 35 31. Moore M, Stuart B, Lown M, et al. Predictors of adverse outcomes in uncomplicated
- 36 lower respiratory tract infections. *Annals of Family Medicine* **2019**;
- 37
- 38 32. Little P, Stuart B, Hobbs FDR, et al. Antibiotic prescription strategies for acute sore
- 39 throat: A prospective observational cohort study. *The Lancet Infectious Diseases* **2014**;
- 40
- 41 33. Spinks A, Glasziou PP, Del Mar CB. Antibiotics for sore throat. *Cochrane Database*
- 42 *Syst Rev* **2013**; :CD000023.
- 43
- 44 34. Venekamp RP, Sanders SL, Glasziou PP, Del Mar CB, Rovers MM. Antibiotics for
- 45 acute otitis media in children. *Cochrane Database of Systematic Reviews* **2015**;
- 46
- 47 35. Little P, Stuart B, Richard Hobbs FD, et al. Predictors of suppurative complications for
- 48 acute sore throat in primary care: Prospective clinical cohort study. *BMJ (Online)* **2013**;
- 49 347:f6867.
- 50
- 51
- 52
- 53
- 54
- 55
- 56
- 57
- 58
- 59
- 60

## TABLES

**Table 1. Demographic and characteristics of the GP practices included in CPRD, CPRD-HES, and SAIL datasets. The CPRD dataset covers England, Scotland, and Northern Island. CPRD-HES covers England only. SAIL databank covers Wales only.**

|                                                          | CPRD<br>n= 546 | CPRD-HES linked<br>n= 346 | SAIL<br>n= 338 |
|----------------------------------------------------------|----------------|---------------------------|----------------|
| Consultations                                            |                |                           |                |
| Upper Respiratory Tract Infection (URTI)                 | 9,646,774      | 5,698,611                 | 1,956,752      |
| Lower Respiratory Tract Infection (LRTI)                 | 2,288,616      | 1,321,593                 | 435,929        |
| Otitis Externa                                           | 1,166,023      | 708,465                   | 183,843        |
| Otitis Media                                             | 864,791        | 529,946                   | 215,495        |
| Sinusitis                                                | 707,736        | 422,638                   | 97,636         |
| Urinary Tract Infection (UTI)                            | 1,511,176      | 881,957                   | 263,921        |
| Age (mean, sd)                                           | 38.50 (3.86)   | 38.47 (3.72)              | 30.17 (7.11)   |
| Sex female (%)                                           | 58.98          | 59.06                     | 56.25          |
| Charlson comorbidity index (CCI) (mean (%))              |                |                           |                |
| None (0)                                                 | 65.80          | 66.16                     | 77.28          |
| Low (1-2)                                                | 27.41          | 27.24                     | 18.39          |
| Medium (3-4)                                             | 5.10           | 4.97                      | 3.24           |
| High (5-6)                                               | 1.25           | 1.19                      | 0.81           |
| Very high (>7)                                           | 0.45           | 0.44                      | 0.28           |
| Region (count, %)                                        |                |                           |                |
| North England                                            | 109 (20.0%)    | 83 (24.0%)                | -              |
| Midlands                                                 | 120 (22.0%)    | 87 (25.1%)                | -              |
| South England                                            | 158 (28.9%)    | 124 (35.8%)               | -              |
| London                                                   | 67 (12.3%)     | 52 (15.0%)                | -              |
| Devolved Administrations (Northern Ireland and Scotland) | 92 (16.8%)     | -                         | -              |
| Wales                                                    | -              | -                         | 338 (100%)     |
| Socioeconomic status (mean (%))                          |                |                           |                |
| 1 least deprived                                         | 13.29          | 20.98                     | 23.77          |
| 2                                                        | 14.25          | 22.49                     | 21.36          |
| 3                                                        | 12.49          | 19.71                     | 21.17          |
| 4                                                        | 12.47          | 19.68                     | 17.65          |
| 5 most deprived                                          | 10.17          | 16.05                     | 16.05          |
| Missing data                                             | 37.32          | 1.09                      | -              |
| Hospitalisation in previous year (mean (%))              | 0.02           | 0.02                      | 0.03           |
| GPs per 1000 consults (mean, sd)                         | 3.54 (2.30)    | 3.52 (2.25)               | NA             |

Footnote table 1. GP count per 1000 consults was not available in SAIL databank.

**Table 2. Rates of infection-related complications and or hospital admission in the 30 days after GP visit for common infection. Hospital admission was identified from the linked HES data. GP-recorded infection-related complications were identified from the electronic health records, which included any revisit to the GP for complications after the initial consultation.**

| Infection-related complications            | Number of cases (30 day follow-up) | Sum person-months (30 day follow-up) | Rate and 95% CI (per 1000 person-month) |
|--------------------------------------------|------------------------------------|--------------------------------------|-----------------------------------------|
| Infection-related complication GP-recorded |                                    |                                      |                                         |
| CPRD                                       | 25,721                             | 19,220,606                           | 1.34 (1.32 - 1.35)                      |
| SAIL                                       | 15,192                             | 3,718,739                            | 4.09 (4.02 - 4.15)                      |
| Hospital admission                         |                                    |                                      |                                         |
| CPRD-HES linked                            | 17,810                             | 12,335,982                           | 1.44 (1.42 - 1.47)                      |
| SAIL-HES                                   | 19,796                             | 3,900,897                            | 5.08 (5.00 - 5.15)                      |

**Table 2. Antibiotic prescribing rates for each common infection across practices included in CPRD (n=546), CPRD-HES (n=346), and SAIL (n= 338). Rates are presented for six common infections. Proportion of consultations with antibiotics prescribed is presented with the mean percentage and the 5<sup>th</sup> through 95<sup>th</sup> percentile at practice level. The mean percentage of antibiotic prescribed in CPRD after a consultation for URTI was 46.1%.**

|                                                                                  | Mean % (sd)   | 5 %   | 25 %  | 50 %  | 75 %  | 95 %  |
|----------------------------------------------------------------------------------|---------------|-------|-------|-------|-------|-------|
| Upper Respiratory Tract Infection (URTI); URTI, cough or cold, sore throat       |               |       |       |       |       |       |
| CPRD                                                                             | 46.14 (11.71) | 28.59 | 38.25 | 45.14 | 53.73 | 66.36 |
| CPRD-HES linked                                                                  | 43.74 (10.97) | 28.88 | 38.17 | 45.15 | 53.09 | 63.97 |
| SAIL                                                                             | 43.37 (12.07) | 24.83 | 34.57 | 42.88 | 51.76 | 63.43 |
| Lower Respiratory Tract Infection (LRTI); Excluding community acquired pneumonia |               |       |       |       |       |       |
| CPRD                                                                             | 84.79 (8.89)  | 69.79 | 81.45 | 86.68 | 90.52 | 94.40 |
| CPRD-HES linked                                                                  | 85.24 (8.03)  | 70.89 | 81.90 | 86.80 | 90.57 | 94.68 |
| SAIL                                                                             | 78.11 (11.66) | 55.47 | 71.56 | 80.45 | 86.69 | 93.17 |
| Otitis Externa                                                                   |               |       |       |       |       |       |
| CPRD                                                                             | 26.33 (8.98)  | 15.34 | 20.00 | 24.55 | 31.00 | 42.70 |
| CPRD-HES linked                                                                  | 26.52 (8.44)  | 15.34 | 20.13 | 25.16 | 31.37 | 41.57 |
| SAIL                                                                             | 29.57 (10.65) | 14.92 | 22.03 | 28.71 | 34.89 | 48.5  |
| Otitis Media                                                                     |               |       |       |       |       |       |
| CPRD                                                                             | 78.10 (10.86) | 58.35 | 73.05 | 80.27 | 86.09 | 91.57 |
| CPRD-HES linked                                                                  | 78.27 (9.83)  | 59.20 | 73.35 | 79.51 | 85.81 | 91.30 |
| SAIL                                                                             | 78.49 (11.81) | 54.91 | 72.64 | 80.57 | 87.49 | 92.65 |
| Sinusitis                                                                        |               |       |       |       |       |       |
| CPRD                                                                             | 84.97 (8.93)  | 67.89 | 82.48 | 87.13 | 90.29 | 94.43 |
| CPRD-HES linked                                                                  | 85.75 (7.88)  | 70.07 | 83.20 | 87.60 | 90.63 | 94.57 |
| SAIL                                                                             | 82.12 (9.91)  | 63.36 | 77.44 | 84.22 | 88.89 | 94.73 |
| Urinary Tract Infection (UTI)                                                    |               |       |       |       |       |       |
| CPRD                                                                             | 85.90 (7.39)  | 74.01 | 82.96 | 87.28 | 90.98 | 93.72 |
| CPRD-HES linked                                                                  | 86.06 (6.40)  | 74.08 | 83.19 | 87.01 | 90.79 | 93.30 |
| SAIL                                                                             | 81.50 (10.30) | 61.46 | 76.70 | 84.66 | 88.65 | 93.18 |

## Figures

Figure 1. Incidence rate ratios (IRR) and 95% confidence interval (CI) of GP-recorded infection-related complications and hospital admissions comparing antibiotic prescribing at 75th to 25th percentile (IQR). Results are presented by data source. CPRD and SAIL effect estimates were combined using a fixed-effect meta-analysis method.

Figure 2. Effect estimates (IRRs and 95% CI) of GP-recorded infection-related complications and hospital admissions. Analyses compared antibiotic prescribing at 75th and 25th percentile (IQR) by 6 common infections. The IRR for hospital admission after a consultation for URTI in CPRD-HES was 0.923. This means for a 14.9% increase in antibiotic prescribing the rate of hospital admission is reduced by 7.7%.

Figure 3. Association of GP-recorded infection-related complications and hospital admissions comparing practice antibiotic prescribing at 75th and 25th percentile (IQR) by gender and age groups. Weights are from fixed-effects analysis.

1  
2  
3  
4  
5  
6  
7  
8  
9  
10  
11  
12  
13  
14  
15  
16  
17  
18  
19  
20  
21  
22  
23  
24  
25  
26  
27  
28  
29  
30  
31  
32  
33  
34  
35  
36  
37  
38  
39  
40  
41  
42  
43  
44  
45  
46  
47  
48  
49  
50  
51  
52  
53  
54  
55  
56  
57  
58  
59  
60



Incidence rate ratios (IRR) and 95% confidence interval (CI) of GP-recorded infection-related complications and hospital admissions comparing antibiotic prescribing at 75th to 25th percentile (IQR). Results are presented by data source. CPRD and SAIL effect estimates were combined using a fixed-effect meta-analysis method.





Effect estimates (IRRs and 95% CI) of GP-recorded infection-related complications and hospital admissions. Analyses compared antibiotic prescribing at 75th and 25th percentile (IQR) by 6 common infections. The IRR for hospital admission after a consultation for URTI in CPRD-HES was 0.923. This means for an 14.9% increase in antibiotic prescribing the rate of hospital admission is reduced by 7.7%.



1  
2  
3  
4  
5  
6  
7  
8  
9  
10  
11  
12  
13  
14  
15  
16  
17  
18  
19  
20  
21  
22  
23  
24  
25  
26  
27  
28  
29  
30  
31  
32  
33  
34  
35  
36  
37  
38  
39  
40  
41  
42  
43  
44  
45  
46  
47  
48  
49  
50  
51  
52  
53  
54  
55  
56  
57  
58  
59  
60



Association of GP-recorded infection-related complications and hospital admissions comparing practice antibiotic prescribing at 75th and 25th percentile (IQR) by gender and age groups. Weights are from fixed-effects analysis.

## Supplementary Material

### Appendix 1. Summary counts of infection-related hospital admission types as recorded as hospital admission codes in the primary care records.

**Table S1. Summary counts of distribution of infection-related complications based on hospital admission codes in CPRD-HES. Table shows counts from CPRD-HES by sex and age for multiple infection-related complications.**

| CPRD-HES                                         | All   | Male  | Female | Age 0-17 | Age 18-39 | Age 40-59 | Age 60-74 | Age 75+ |
|--------------------------------------------------|-------|-------|--------|----------|-----------|-----------|-----------|---------|
| Cough/Cold                                       | 103   | 60    | 43     | 96       | <5        | <5        | <5        | <5      |
| LRTI/Pneumonia                                   | 13543 | 6026  | 7527   | 2515     | 877       | 1681      | 2418      | 6056    |
| Otitis externa                                   | 67    | 29    | 38     | 12       | 18        | 16        | 10        | 10      |
| Otitis media                                     | 432   | 223   | 209    | 236      | 64        | 64        | 47        | 18      |
| Sinusitis                                        | 46    | 16    | 31     | 7        | 7         | 15        | 14        | <5      |
| Sore Throat                                      | 2000  | 1066  | 932    | 481      | 1085      | 357       | 58        | 17      |
| URTI                                             | 695   | 375   | 319    | 509      | 47        | 42        | 36        | 62      |
| UTI                                              | 112   | 39    | 73     | <5       | 36        | 12        | 27        | 38      |
| Sepsis                                           | 397   | 183   | 214    | 16       | 16        | 31        | 85        | 249     |
| Meningitis                                       | 45    | 18    | 27     | 13       | 11        | 10        | 5         | 6       |
| Infection-related complication, protocol defined | 17810 | 8234  | 9580   | 3673     | 2226      | 2464      | 2890      | 6562    |
| Any hospitalisation, not infection specific      | 77704 | 34050 | 43695  | 8196     | 7865      | 11990     | 18640     | 31030   |

Note 1: the sum of specific infections does not add up to sum of infection-related complications protocol defined due to a subset of patients having multiple infection-related complication admission codes. Note 2: the sum of Male and Female, and the sum of the age categories may not add up to the sum of 'All' due to some missingness in gender or year-of-birth registration in the patient's medical records.

## Appendix 2. Sensitivity analysis of continuous antibiotic prescribing rate

A sensitivity analysis was performed to determine if treating the antibiotic prescribing rate continuously is justified. The rate of infection-related hospital admission and antibiotic prescribing rate was modelled with negative binomial regression. The antibiotic prescribing rate was decile ranked to create 10 equally sized subsections. These deciles were modelled in the exact same way as the main analyses presented in this paper. First, second, and third degree polynomials were fitted on the deciled antibiotic rate and evaluated against the IRRs for infection-related complication as recorded by the GP ('A', 'B', 'C') and for infection-related hospital admission ('D', 'E', 'F'). For both outcomes the first order polynomials were the preferred models. Figure S1 Plot A shows a strong linear trend for between low prescribing at deciles 1 to 3 and high prescribing at deciles 8 to 10. Although the error bars of each point estimate overlap a downward linear trend is observable. Creating categories of the antibiotic prescribing rate may hide significant variability within each specific category. Treating the antibiotic prescribing rate continuously ensures that each GP practice is analysed separately against the outcomes of interest.

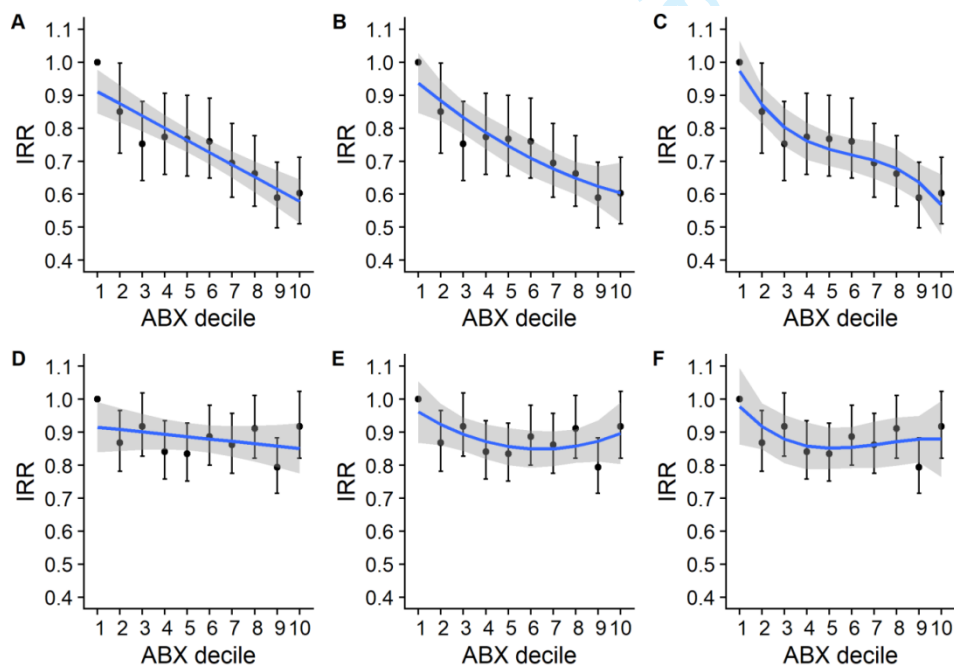

Figure s1. First (left), second (middle), and third (right) degree polynomials fitted on the deciled antibiotic prescribing rate. Plot A, B, and C model outcome infection-related complication as recorded by the GP. Plot D, E, and F model outcome infection-related hospital admission.

### Appendix 3. Sensitivity analysis of paired infection-related complication with common infection

A sensitivity analysis was performed where antibiotic prescribing for URTI and for LRTI was linked with three adverse outcomes: 1) Pneumonia GP diagnosed (CPRD), 2) LRTI hospital admission (CPRD-HES), and 3) Pneumonia hospital admission (CPRD-HES).

**Table S2. Adjusted IRRs from paired analysis of infection-related complications after a common infection with URTI or LRTI.**

| Common infection / infection-related complication | Adjusted IRR (95% CI) | IQR   |
|---------------------------------------------------|-----------------------|-------|
| URTI / Pneumonia (CPRD)                           | 0.801 (0.743 - 0.864) | 15.48 |
| URTI / LRTI (CPRD-HES)                            | 0.928 (0.868 - 0.992) | 14.92 |
| URTI / Pneumonia (CPRD-HES)                       | 0.888 (0.805 - 0.978) | 14.92 |
| LRTI / Pneumonia (CPRD)                           | 0.842 (0.787 - 0.902) | 9.07  |
| LRTI / LRTI (CPRD-HES)                            | 0.820 (0.765 - 0.879) | 8.67  |
| LRTI / Pneumonia (CPRD-HES)                       | 0.917 (0.834 - 1.011) | 8.67  |

**STROBE 2007 (v4) Statement—Checklist of items that should be included in reports of *cohort studies***

| Section/Topic                | Item # | Recommendation                                                                                                                                                                       | Reported on page # |
|------------------------------|--------|--------------------------------------------------------------------------------------------------------------------------------------------------------------------------------------|--------------------|
| <b>Title and abstract</b>    | 1      | (a) Indicate the study's design with a commonly used term in the title or the abstract                                                                                               | 1                  |
|                              |        | (b) Provide in the abstract an informative and balanced summary of what was done and what was found                                                                                  | 2                  |
| <b>Introduction</b>          |        |                                                                                                                                                                                      |                    |
| Background/rationale         | 2      | Explain the scientific background and rationale for the investigation being reported                                                                                                 | 3                  |
| Objectives                   | 3      | State specific objectives, including any prespecified hypotheses                                                                                                                     | 4                  |
| <b>Methods</b>               |        |                                                                                                                                                                                      |                    |
| Study design                 | 4      | Present key elements of study design early in the paper                                                                                                                              | 5                  |
| Setting                      | 5      | Describe the setting, locations, and relevant dates, including periods of recruitment, exposure, follow-up, and data collection                                                      | 5-7                |
| Participants                 | 6      | (a) Give the eligibility criteria, and the sources and methods of selection of participants. Describe methods of follow-up                                                           | 5-6                |
|                              |        | (b) For matched studies, give matching criteria and number of exposed and unexposed                                                                                                  | -                  |
| Variables                    | 7      | Clearly define all outcomes, exposures, predictors, potential confounders, and effect modifiers. Give diagnostic criteria, if applicable                                             | 5-7                |
| Data sources/<br>measurement | 8*     | For each variable of interest, give sources of data and details of methods of assessment (measurement). Describe comparability of assessment methods if there is more than one group | 5                  |
| Bias                         | 9      | Describe any efforts to address potential sources of bias                                                                                                                            | 7                  |
| Study size                   | 10     | Explain how the study size was arrived at                                                                                                                                            | -                  |
| Quantitative variables       | 11     | Explain how quantitative variables were handled in the analyses. If applicable, describe which groupings were chosen and why                                                         | -                  |
| Statistical methods          | 12     | (a) Describe all statistical methods, including those used to control for confounding                                                                                                | 7-8                |
|                              |        | (b) Describe any methods used to examine subgroups and interactions                                                                                                                  | 8                  |
|                              |        | (c) Explain how missing data were addressed                                                                                                                                          | 7                  |
|                              |        | (d) If applicable, explain how loss to follow-up was addressed                                                                                                                       | -                  |
|                              |        | (e) Describe any sensitivity analyses                                                                                                                                                | 8                  |
| <b>Results</b>               |        |                                                                                                                                                                                      |                    |

|                          |     |                                                                                                                                                                                                                                                                                                                                                                                                               |                                           |
|--------------------------|-----|---------------------------------------------------------------------------------------------------------------------------------------------------------------------------------------------------------------------------------------------------------------------------------------------------------------------------------------------------------------------------------------------------------------|-------------------------------------------|
| Participants             | 13* | (a) Report numbers of individuals at each stage of study—eg numbers potentially eligible, examined for eligibility, confirmed eligible, included in the study, completing follow-up, and analysed<br>(b) Give reasons for non-participation at each stage<br>(c) Consider use of a flow diagram                                                                                                               | 9<br>-<br>-                               |
| Descriptive data         | 14* | (a) Give characteristics of study participants (eg demographic, clinical, social) and information on exposures and potential confounders<br>(b) Indicate number of participants with missing data for each variable of interest<br>(c) Summarise follow-up time (eg, average and total amount)                                                                                                                | 9 + table 1<br>9 + table 1<br>9 + table 2 |
| Outcome data             | 15* | Report numbers of outcome events or summary measures over time                                                                                                                                                                                                                                                                                                                                                | 9 + table 2                               |
| Main results             | 16  | (a) Give unadjusted estimates and, if applicable, confounder-adjusted estimates and their precision (eg, 95% confidence interval). Make clear which confounders were adjusted for and why they were included<br>(b) Report category boundaries when continuous variables were categorized<br>(c) If relevant, consider translating estimates of relative risk into absolute risk for a meaningful time period | 9 – 11 +<br>Figure 1 – 3<br>-<br>-        |
| Other analyses           | 17  | Report other analyses done—eg analyses of subgroups and interactions, and sensitivity analyses                                                                                                                                                                                                                                                                                                                | 11                                        |
| <b>Discussion</b>        |     |                                                                                                                                                                                                                                                                                                                                                                                                               |                                           |
| Key results              | 18  | Summarise key results with reference to study objectives                                                                                                                                                                                                                                                                                                                                                      | 11                                        |
| <b>Limitations</b>       |     |                                                                                                                                                                                                                                                                                                                                                                                                               |                                           |
| Interpretation           | 20  | Give a cautious overall interpretation of results considering objectives, limitations, multiplicity of analyses, results from similar studies, and other relevant evidence                                                                                                                                                                                                                                    | 11-12                                     |
| Generalisability         | 21  | Discuss the generalisability (external validity) of the study results                                                                                                                                                                                                                                                                                                                                         | 11- 15                                    |
| <b>Other information</b> |     |                                                                                                                                                                                                                                                                                                                                                                                                               |                                           |
| Funding                  | 22  | Give the source of funding and the role of the funders for the present study and, if applicable, for the original study on which the present article is based                                                                                                                                                                                                                                                 | 16                                        |

\*Give information separately for cases and controls in case-control studies and, if applicable, for exposed and unexposed groups in cohort and cross-sectional studies.

**Note:** An Explanation and Elaboration article discusses each checklist item and gives methodological background and published examples of transparent reporting. The STROBE checklist is best used in conjunction with this article (freely available on the Web sites of PLoS Medicine at <http://www.plosmedicine.org/>, Annals of Internal Medicine at <http://www.annals.org/>, and Epidemiology at <http://www.epidem.com/>). Information on the STROBE Initiative is available at [www.strobe-statement.org](http://www.strobe-statement.org).
